# Supplementary material for: Transcription Factor Binding Site Redundancy in Embryonic Enhancers of the Drosophila Bithorax Complex
Source: G3 (Bethesda). 2011 Dec 1;1(7):603–6. doi: 10.1534/g3.111.001404 (PMC3276168; doi:10.1534/g3.111.001404)
Supplement: Supporting Information [file supp_1.7.603_TableS1.xls]

## Sheet: Sheet1
Drewell Supplementary table 1
map	strand	Patser start	Patser end	start	end	sequence	score	ln(P)	Anno	Dis R	Dis L	Avg dis	Avg dis En
DMU31961	D	-326881	-326873	11353	11361	aaccAAAGCGTTTacaa	6.67	-9.42			5856	5856
DMU31961	D	-321025	-321017	17209	17217	taaaAAACGGTTAtagc	7.1	-10.59		5856	136	2996
DMU31961	D	-320889	-320881	17345	17353	ctggAAGGGGTTAaaag	6.78	-9.89		136	25	80.5
DMU31961	R	-320864	-320856	17370	17378	aagcAAAGGGTTTaaga	7.78	-11.37		25	3506	1765.5
DMU31961	D	-317358	-317350	20876	20884	gggcAAAGCGTTTagct	6.67	-9.42		3506	1810	2658
DMU31961	D	-315548	-315540	22686	22694	tcccAAAGGCTTTcgaa	6.72	-9.6		1810	2679	2244.5
DMU31961	R	-312869	-312861	25365	25373	tcgtAACGGGTTTgagg	7.21	-10.85		2679	2712	2695.5
DMU31961	D	-310157	-310149	28077	28085	gcaaAAAGGGTTTcgaa	7.78	-11.37		2712	3056	2884
DMU31961	R	-307101	-307093	31133	31141	ttgtAAGGGGTTTttat	6.69	-9.54		3056	626	1841
DMU31961	D	-306475	-306467	31759	31767	gcgaAAAGGGTTCtcca	6.68	-9.49		626	2772	1699
DMU31961	D	-303703	-303695	34531	34539	ttaaAAAGCGTTTattt	6.67	-9.42		2772	3124	2948
DMU31961	D	-300579	-300571	37655	37663	gacaAACGGGTTTtggg	7.21	-10.85		3124	2307	2715.5
DMU31961	R	-298272	-298264	39962	39970	agaaAAAGGGTTTgtat	7.78	-11.37		2307	3708	3007.5
DMU31961	D	-294564	-294556	43670	43678	catcAATGGGTTAagga	6.39	-9.15		3708	741	2224.5
DMU31961	R	-293823	-293815	44411	44419	cagcAAAGCGTTTtacg	6.67	-9.42		741	237	489
DMU31961	R	-293586	-293578	44648	44656	tttaAAAGGGTTAaaga	7.87	-12.05		237	991	614
DMU31961	D	-292595	-292587	45639	45647	gaaaAAAGGGTTCcgag	6.68	-9.49		991	437	714
DMU31961	R	-292158	-292150	46076	46084	ttcaAATGGGTTTatgg	6.3	-9.06		437	132	284.5
DMU31961	D	-292026	-292018	46208	46216	aatgAAAGGCTTTattg	6.72	-9.6		132	5468	2800
DMU31961	D	-286558	-286550	51676	51684	aatcTAAGGGTTAtagg	6.83	-10.21		5468	10021	7744.5
DMU31961	D	-276537	-276529	61697	61705	ggtgAAAGGGTTCtatt	6.68	-9.49		10021	291	5156
DMU31961	D	-276246	-276238	61988	61996	aacaAAAGGGTTTggag	7.78	-11.37	IAB8	291	390	340.5	340.5
DMU31961	D	-275856	-275848	62378	62386	ggctTAAGGGTTTggtt	6.74	-9.69		390	3692	2041
DMU31961	R	-272164	-272156	66070	66078	acttAATGGGTTTcagg	6.3	-9.06		3692	2001	2846.5
DMU31961	R	-270163	-270155	68071	68079	ttaaAAGGGGTTAaagc	6.78	-9.89		2001	1	1001
DMU31961	R	-270162	-270154	68072	68080	gttaAAAGGGGTTaaag	6.3	-9.11		1	5922	2961.5
DMU31961	D	-264240	-264232	73994	74002	tatcAAAGGGTTGcgat	6.81	-10.06		5922	6705	6313.5
DMU31961	D	-257535	-257527	80699	80707	ggagAACGGGTTTatct	7.21	-10.85	IAB7a	6705	4142	5423.5	5423.5
DMU31961	D	-253393	-253385	84841	84849	caccAATGGGTTTcttt	6.3	-9.06		4142	5465	4803.5
DMU31961	R	-247928	-247920	90306	90314	agagAAAGGCTTTtcaa	6.72	-9.6	IAB6	5465	297	2881
DMU31961	R	-247631	-247623	90603	90611	aaggAACGGGTTTcggc	7.21	-10.85	IAB6	297	804	550.5
DMU31961	R	-246827	-246819	91407	91415	tggaAAGGGGTTTtacg	6.69	-9.54	IAB6	804	1	402.5
DMU31961	R	-246826	-246818	91408	91416	atggAAAGGGGTTttac	6.3	-9.11	IAB6	1	102	51.5
DMU31961	D	-246724	-246716	91510	91518	gcagAAGGGGTTAtgga	6.78	-9.89	IAB6	102	1586	844	945.9
DMU31961	R	-245138	-245130	93096	93104	ggaaAAGGGGTTActtc	6.78	-9.89		1586	1	793.5
DMU31961	R	-245137	-245129	93097	93105	aggaAAAGGGGTTactt	6.3	-9.11		1	11442	5721.5
DMU31961	D	-233695	-233687	104539	104547	ttgcAAAGGGTTGagtt	6.81	-10.06	IAB5	11442	4614	8028	8028
DMU31961	R	-229081	-229073	109153	109161	cttaAACGGGTTAaatc	7.3	-11.07		4614	9032	6823
DMU31961	R	-220049	-220041	118185	118193	agacAAAGGGTTGcagc	6.81	-10.06		9032	984	5008
DMU31961	D	-219065	-219057	119169	119177	gaagAAAGGGTTAataa	7.87	-12.05		984	5387	3185.5
DMU31961	D	-213678	-213670	124556	124564	ttagAATGGGTTTtatt	6.3	-9.06		5387	2139	3763
DMU31961	D	-211539	-211531	126695	126703	aatgAAAGGCTTTctgt	6.72	-9.6		2139	1068	1603.5
DMU31961	R	-210471	-210463	127763	127771	caacAAAGGGTGAttat	6.59	-9.37		1068	4086	2577
DMU31961	R	-206385	-206377	131849	131857	atcaAATGGGTTAatgt	6.39	-9.15		4086	805	2445.5
DMU31961	R	-205580	-205572	132654	132662	catgAAGGGGTTAgggg	6.78	-9.89		805	3643	2224
DMU31961	R	-201937	-201929	136297	136305	actcAAAGCGTTTtgct	6.67	-9.42		3643	715	2179
DMU31961	D	-201222	-201214	137012	137020	caacAAAGGGTTAgtaa	7.87	-12.05		715	4851	2783
DMU31961	R	-196371	-196363	141863	141871	acgcAAAGGGGTAtcat	6.39	-9.2		4851	1198	3024.5
DMU31961	D	-195173	-195165	143061	143069	acatTAAGGGTTAtgcg	6.83	-10.21		1198	563	880.5
DMU31961	D	-194610	-194602	143624	143632	gggcAAGGGGTTTcgag	6.69	-9.54		563	1177	870
DMU31961	D	-193433	-193425	144801	144809	tgaaAAACGGTTTgcga	7.01	-10.38		1177	287	732
DMU31961	D	-193146	-193138	145088	145096	atgcAAAGGGGTAaata	6.39	-9.2		287	429	358
DMU31961	D	-192717	-192709	145517	145525	taaaAACGGGTTTtcgt	7.21	-10.85		429	762	595.5
DMU31961	D	-191955	-191947	146279	146287	tgttAAAGGGTTTgtga	7.78	-11.37		762	117	439.5
DMU31961	D	-191838	-191830	146396	146404	cccaAAACGGTTTcagt	7.01	-10.38		117	958	537.5
DMU31961	R	-190880	-190872	147354	147362	gtggAAAGGGTTAtttg	7.87	-12.05		958	5528	3243
DMU31961	D	-185352	-185344	152882	152890	aattTAAGGGTTTtttt	6.74	-9.69		5528	8192	6860
DMU31961	D	-177160	-177152	161074	161082	aagcAATGGGTTAtttc	6.39	-9.15		8192	1773	4982.5
DMU31961	D	-175387	-175379	162847	162855	gacaAAAGCGTTTcttt	6.67	-9.42		1773	1308	1540.5
DMU31961	D	-174079	-174071	164155	164163	ggcgAAAGGGGTTtgga	6.3	-9.11		1308	1	654.5
DMU31961	D	-174078	-174070	164156	164164	gcgaAAGGGGTTTggat	6.69	-9.54		1	6816	3408.5
DMU31961	R	-167262	-167254	170972	170980	tcaaAAAGCGTTAagtg	6.76	-9.79		6816	1702	4259
DMU31961	R	-165560	-165552	172674	172682	cgtgAAAGGGTGAagct	6.59	-9.37	IAB2	1702	10013	5857.5	5857.5
DMU31961	R	-155547	-155539	182687	182695	tgtgAAAGGGTTAagaa	7.87	-12.05		10013	4511	7262
DMU31961	R	-151036	-151028	187198	187206	agttAAAGGCTTTcgag	6.72	-9.6		4511	13503	9007
DMU31961	R	-137533	-137525	200701	200709	ttgaAACGGGTTAggag	7.3	-11.07		13503	1408	7455.5
DMU31961	R	-136125	-136117	202109	202117	tgaaAAAGGGTTCaagt	6.68	-9.49		1408	1335	1371.5
DMU31961	R	-134790	-134782	203444	203452	cacaAAAGGGTGTtgtt	6.5	-9.28		1335	5986	3660.5
DMU31961	D	-128804	-128796	209430	209438	aagtAAAGGCTTAaatt	6.81	-10.07		5986	2537	4261.5
DMU31961	R	-126267	-126259	211967	211975	aagaAAAGGCTTTtcgt	6.72	-9.6		2537	4013	3275
DMU31961	D	-122254	-122246	215980	215988	taccAATGGGTTAttga	6.39	-9.15		4013	886	2449.5
DMU31961	D	-121368	-121360	216866	216874	attgTAAGGGTTTatct	6.74	-9.69		886	9846	5366
DMU31961	R	-111522	-111514	226712	226720	tttgAAAGGGTTCaaga	6.68	-9.49		9846	4074	6960
DMU31961	R	-107448	-107440	230786	230794	actaAAAGGGTTTtggg	7.78	-11.37		4074	2205	3139.5
DMU31961	D	-105243	-105235	232991	232999	tacaAATGGGTTAatac	6.39	-9.15		2205	9170	5687.5
DMU31961	R	-96073	-96065	242161	242169	acttAAAGGCTTTatta	6.72	-9.6		9170	6936	8053
DMU31961	R	-89137	-89129	249097	249105	caccAAAGGGTTAatgg	7.87	-12.05		6936	2434	4685
DMU31961	D	-86703	-86695	251531	251539	attaAATGGGTTAttcg	6.39	-9.15		2434	5346	3890
DMU31961	D	-81357	-81349	256877	256885	ttgaAAAGCGTTTgttg	6.67	-9.42		5346	2108	3727
DMU31961	R	-79249	-79241	258985	258993	cccaAAAGGGGTAaaag	6.39	-9.2		2108	1985	2046.5
DMU31961	D	-77264	-77256	260970	260978	acaaAAACGGTTTccat	7.01	-10.38		1985	167	1076
DMU31961	D	-77097	-77089	261137	261145	aactAAACGGTTAaagc	7.1	-10.59		167	870	518.5
DMU31961	R	-76227	-76219	262007	262015	cgccAATGGGTTAattt	6.39	-9.15		870	3239	2054.5
DMU31961	D	-72988	-72980	265246	265254	tttcAAAGGGGTAtgca	6.39	-9.2		3239	146	1692.5
DMU31961	D	-72842	-72834	265392	265400	ttcaAATGGGTTTcatt	6.3	-9.06		146	1372	759
DMU31961	R	-71470	-71462	266764	266772	aggcTAAGGGTTTacaa	6.74	-9.69		1372	5750	3561
DMU31961	R	-65720	-65712	272514	272522	tggtAATGGGTTAtctt	6.39	-9.15		5750	277	3013.5
DMU31961	R	-65443	-65435	272791	272799	aaatAAAGGGTTAattc	7.87	-12.05		277	5158	2717.5
DMU31961	D	-60285	-60277	277949	277957	gttaAACGGGTTAacta	7.3	-11.07		5158	6336	5747
DMU31961	R	-53949	-53941	284285	284293	tctgAAAGCGTTTcctt	6.67	-9.42		6336	876	3606
DMU31961	D	-53073	-53065	285161	285169	actgAAGGGGTTAttta	6.78	-9.89		876	3548	2212
DMU31961	R	-49525	-49517	288709	288717	gaaaAAAGGGTTGgcgg	6.81	-10.06		3548	501	2024.5
DMU31961	D	-49024	-49016	289210	289218	ccgaAAAGGGTTTaatt	7.78	-11.37		501	1696	1098.5
DMU31961	D	-47328	-47320	290906	290914	tgagAAGGGGTTTccaa	6.69	-9.54		1696	3207	2451.5
DMU31961	R	-44121	-44113	294113	294121	tgacAAACGGTTAattg	7.1	-10.59		3207	1321	2264
DMU31961	D	-42800	-42792	295434	295442	tgaaAAAGGGTTTttcg	7.78	-11.37		1321	2682	2001.5
DMU31961	D	-40118	-40110	298116	298124	cctgAAAGGGGTAatta	6.39	-9.2		2682	1040	1861
DMU31961	R	-39078	-39070	299156	299164	cactAACCGGTTTccac	6.45	-9.24		1040	1	520.5
DMU31961	D	-39077	-39069	299157	299165	tggaAACCGGTTAgtgg	6.54	-9.32		1	4136	2068.5
DMU31961	R	-34941	-34933	303293	303301	tgtgAAACGGTTTtggg	7.01	-10.38		4136	416	2276
DMU31961	D	-34525	-34517	303709	303717	aggcAAAGGCTTTacgg	6.72	-9.6		416	3653	2034.5
DMU31961	R	-30872	-30864	307362	307370	ttacAAAGGGTGTattg	6.5	-9.28		3653	1111	2382
DMU31961	D	-29761	-29753	308473	308481	tggcAAAGGGTTAgggc	7.87	-12.05		1111	1721	1416
DMU31961	D	-28040	-28032	310194	310202	ttgaAAAGGGTTGcgct	6.81	-10.06		1721	4721	3221
DMU31961	D	-23319	-23311	314915	314923	ccaaAAAGGGTTCcttc	6.68	-9.49		4721	4536	4628.5
DMU31961	R	-18783	-18775	319451	319459	gggcAAACGGTTTgtcg	7.01	-10.38		4536		4536
													Ratio
											Average	2955.6
											Enhancers	1499.07	1.97162
											BX-C	2978.51	0.992311
											IAB8	340.5	8.68019
											IAB7b	NA	NA
											IAB7a	5423.5	0.544962
											IAB6	945.9	3.12465
											IAB5	8028	0.368162
											IAB2	5857.5	0.504585
