# Supplementary material for: Transcription Factor Binding Site Redundancy in Embryonic Enhancers of the Drosophila Bithorax Complex
Source: G3 (Bethesda). 2011 Dec 1;1(7):603–6. doi: 10.1534/g3.111.001404 (PMC3276168; doi:10.1534/g3.111.001404)
Supplement: Supporting Information [file supp_1.7.603_TableS2.xls]

## Sheet: Sheet1
Drewell Supplementary table 2
map	strand	Patser start	Patser end	start	end	sequence	score	ln(P)	Anno	Dis R	Dis L	Avg dis	Avg dis En
BX-C random	D	-335793	-335785	2531	2539	ccgaAATGGGTTAcaag	6.39	-9.15			4887	4887
BX-C random	R	-330906	-330898	7418	7426	aataAAAGCGTTAccaa	6.76	-9.79		4887	1591	3239
BX-C random	D	-329315	-329307	9009	9017	ttcgAACGGGTTTgttg	7.21	-10.85		1591	6938	4264.5
BX-C random	D	-322377	-322369	15947	15955	cttcAAAGGGTTGgtgt	6.81	-10.06		6938	2095	4516.5
BX-C random	R	-320282	-320274	18042	18050	gtttAACGGGTTAtatt	7.3	-11.07		2095	10362	6228.5
BX-C random	R	-309920	-309912	28404	28412	ggagAAAGGGTTGcttc	6.81	-10.06		10362	4479	7420.5
BX-C random	R	-305441	-305433	32883	32891	acttAAAGCGTTAaagg	6.76	-9.79		4479	4771	4625
BX-C random	R	-300670	-300662	37654	37662	ggcgAATGGGTTTaaac	6.3	-9.06		4771	11181	7976
BX-C random	R	-289489	-289481	48835	48843	actcAAACGGTTAtgaa	7.1	-10.59		11181	15226	13203.5
BX-C random	D	-274263	-274255	64061	64069	cgatAAAGGGTTCtcag	6.68	-9.49		15226	1797	8511.5
BX-C random	D	-272466	-272458	65858	65866	aaagAAAGGGTTTaatg	7.78	-11.37		1797	9586	5691.5
BX-C random	D	-262880	-262872	75444	75452	agaaAATGGGTTTggtg	6.3	-9.06		9586	2286	5936
BX-C random	D	-260594	-260586	77730	77738	aattAAACGGTTTgagc	7.01	-10.38		2286	460	1373
BX-C random	D	-260134	-260126	78190	78198	gagaTACGGGTTAgcgt	6.27	-9.03		460	3582	2021
BX-C random	R	-256552	-256544	81772	81780	gtacAAACGGTTAtgaa	7.1	-10.59		3582	2033	2807.5
BX-C random	R	-254519	-254511	83805	83813	taatTAAGGGTTAaaat	6.83	-10.21		2033	12725	7379
BX-C random	D	-241794	-241786	96530	96538	cattAAAGCGTTTaaca	6.67	-9.42		12725	3355	8040
BX-C random	D	-238439	-238431	99885	99893	gaggAAAGGCTTAcaat	6.81	-10.07		3355	772	2063.5
BX-C random	R	-237667	-237659	100657	100665	gtccAACGGGTTTcttc	7.21	-10.85		772	141	456.5
BX-C random	D	-237526	-237518	100798	100806	agatAAGGGGTTAggct	6.78	-9.89		141	913	527
BX-C random	D	-236613	-236605	101711	101719	aataAATGGGTTAtggt	6.39	-9.15		913	416	664.5
BX-C random	D	-236197	-236189	102127	102135	cgtcAACCGGTTTaatt	6.45	-9.24		416	2560	1488
BX-C random	R	-233637	-233629	104687	104695	caatAATGGGTTTgatc	6.3	-9.06		2560	7827	5193.5
BX-C random	D	-225810	-225802	112514	112522	ttcgAAAGGGTGAgtgg	6.59	-9.37		7827	5147	6487
BX-C random	R	-220663	-220655	117661	117669	aagaTAAGGGTTTatca	6.74	-9.69		5147	1659	3403
BX-C random	D	-219004	-218996	119320	119328	ttttTAAGGGTTTctta	6.74	-9.69		1659	496	1077.5
BX-C random	D	-218508	-218500	119816	119824	actgTAAGGGTTTtata	6.74	-9.69		496	4126	2311
BX-C random	R	-214382	-214374	123942	123950	tttaAAAGGGTGAttga	6.59	-9.37		4126	26790	15458
BX-C random	R	-187592	-187584	150732	150740	cattAAACGGTTTtgtc	7.01	-10.38		26790	5633	16211.5
BX-C random	R	-181959	-181951	156365	156373	gcgcAAAGGCTTTtcct	6.72	-9.6		5633	15774	10703.5
BX-C random	R	-166185	-166177	172139	172147	tataAAGGGGTTAtcta	6.78	-9.89		15774	1	7887.5
BX-C random	R	-166184	-166176	172140	172148	ttatAAAGGGGTTatct	6.3	-9.11		1	30710	15355.5
BX-C random	R	-135474	-135466	202850	202858	agaaAAAGCGTTAaaac	6.76	-9.79		30710	1462	16086
BX-C random	R	-134012	-134004	204312	204320	tcttAATGGGTTAgtct	6.39	-9.15		1462	433	947.5
BX-C random	D	-133579	-133571	204745	204753	taacTAAGGGTTTgtca	6.74	-9.69		433	716	574.5
BX-C random	D	-132863	-132855	205461	205469	tcgtAAAGGGTTCtata	6.68	-9.49		716	2983	1849.5
BX-C random	D	-129880	-129872	208444	208452	tatgAATGGGTTTtgtc	6.3	-9.06		2983	382	1682.5
BX-C random	R	-129498	-129490	208826	208834	gattAAAGCGTTAaaac	6.76	-9.79		382	71	226.5
BX-C random	R	-129427	-129419	208897	208905	ccagAACCGGTTTcttc	6.45	-9.24		71	7235	3653
BX-C random	D	-122192	-122184	216132	216140	ttatAAAGGCTTAacac	6.81	-10.07		7235	5374	6304.5
BX-C random	D	-116818	-116810	221506	221514	gggcAACCGGTTTtcat	6.45	-9.24		5374	921	3147.5
BX-C random	D	-115897	-115889	222427	222435	cgcaAAAGGGTTAtatg	7.87	-12.05		921	1126	1023.5
BX-C random	D	-114771	-114763	223553	223561	ccaaAAAGGCTTAacag	6.81	-10.07		1126	13732	7429
BX-C random	R	-101039	-101031	237285	237293	gaacAAAGCGTTAggaa	6.76	-9.79		13732	11264	12498
BX-C random	D	-89775	-89767	248549	248557	cacgTAAGGGTTAatca	6.83	-10.21		11264	7064	9164
BX-C random	R	-82711	-82703	255613	255621	agtaAAAGGGTTAtgca	7.87	-12.05		7064	790	3927
BX-C random	R	-81921	-81913	256403	256411	ctaaAAAGGGTGTttga	6.5	-9.28		790	903	846.5
BX-C random	D	-81018	-81010	257306	257314	aagaTAAGGGTTAtatc	6.83	-10.21		903	14310	7606.5
BX-C random	D	-66708	-66700	271616	271624	tgcaAAAGGCTTAatct	6.81	-10.07		14310	8817	11563.5
BX-C random	R	-57891	-57883	280433	280441	agggAAAGGGTTTaata	7.78	-11.37		8817	1220	5018.5
BX-C random	D	-56671	-56663	281653	281661	ggctAATGGGTTAttaa	6.39	-9.15		1220	1341	1280.5
BX-C random	R	-55330	-55322	282994	283002	ctaaAACGGGTTAggta	7.3	-11.07		1341	9356	5348.5
BX-C random	D	-45974	-45966	292350	292358	agtaAAACGGTTTcgac	7.01	-10.38		9356	562	4959
BX-C random	D	-45412	-45404	292912	292920	acttAAAGGGTGTctaa	6.5	-9.28		562	2379	1470.5
BX-C random	D	-43033	-43025	295291	295299	gctaAAAGGGGTAgctg	6.39	-9.2		2379	7566	4972.5
BX-C random	R	-35467	-35459	302857	302865	agttAAAGGCTTTgtcg	6.72	-9.6		7566	172	3869
BX-C random	R	-35295	-35287	303029	303037	attaAAAGCGTTAgcgc	6.76	-9.79		172	7826	3999
BX-C random	D	-27469	-27461	310855	310863	gaaaAAAGGGTGTtagc	6.5	-9.28		7826	1832	4829
BX-C random	R	-25637	-25629	312687	312695	gataTAAGGGTTTcgga	6.74	-9.69		1832	1874	1853
BX-C random	D	-23763	-23755	314561	314569	cttgAAACGGTTAttct	7.1	-10.59		1874	484	1179
BX-C random	R	-23279	-23271	315045	315053	tgatAAAGGGTGTgcgg	6.5	-9.28		484	559	521.5
BX-C random	R	-22720	-22712	315604	315612	cgacAAAGGCTTAgttt	6.81	-10.07		559	10638	5598.5
BX-C random	R	-12082	-12074	326242	326250	tttgAAAGGGTTTagtg	7.78	-11.37		10638	11939	11288.5
BX-C random	D	-143	-135	338181	338189	tgatAAACGGTTAaacg	7.1	-10.59		11939		11939
													Ratio
											Average	5375.98
											Enhancer	NA	NA
											BX-C	5375.98	1
											IAB8	NA	NA
											IAB7b	NA	NA
											IAB7a	NA	NA
											IAB6	NA	NA
											IAB5	NA	NA
											IAB2	NA	NA
