# Supplementary material for: Transcription Factor Binding Site Redundancy in Embryonic Enhancers of the Drosophila Bithorax Complex
Source: G3 (Bethesda). 2011 Dec 1;1(7):603–6. doi: 10.1534/g3.111.001404 (PMC3276168; doi:10.1534/g3.111.001404)
Supplement: Supporting Information [file supp_1.7.603_TableS3.xls]

## Sheet: Sheet1
Drewell Supplementary table 3
map	strand	Patser start	Patser end	start	end	sequence	score	ln(P)	Anno	Dis R	Dis L	Avg dis	Avg dis En
DMU31961	R	-337366	-337358	868	876	gttgAAAGGCTTGacat	5.76	-8.19			2625	2625
DMU31961	D	-334741	-334733	3493	3501	ccctAAAGGGTGCcaat	5.4	-7.61		2625	1447	2036
DMU31961	R	-333294	-333286	4940	4948	gaatAACGGGATAaagc	5.54	-7.77		1447	2299	1873
DMU31961	D	-330995	-330987	7239	7247	caagAGAGGGTTAaacc	5.8	-8.28		2299	947	1623
DMU31961	D	-330048	-330040	8186	8194	cagaAAACGGTGAtgac	5.82	-8.31		947	856	901.5
DMU31961	R	-329192	-329184	9042	9050	ctgaAATCGGTTTcttc	5.53	-7.74		856	898	877
DMU31961	R	-328294	-328286	9940	9948	agcgAAAGTGTTTtccg	5.71	-8.03		898	1379	1138.5
DMU31961	D	-326915	-326907	11319	11327	ctcgAAAGTGTTAaaat	5.79	-8.24		1379	34	706.5
DMU31961	D	-326881	-326873	11353	11361	aaccAAAGCGTTTacaa	6.67	-9.42		34	0	17
DMU31961	R	-326881	-326873	11353	11361	ttgtAAACGCTTTggtt	5.96	-8.46		0	922	461
DMU31961	D	-325959	-325951	12275	12283	cgtaAAAGAGTTTtcaa	5.59	-7.81		922	1094	1008
DMU31961	R	-324865	-324857	13369	13377	atctAAAGGGTAAacac	5.43	-7.65		1094	1112	1103
DMU31961	R	-323753	-323745	14481	14489	tgctTAAGCGTTAtttg	5.72	-8.09		1112	95	603.5
DMU31961	R	-323658	-323650	14576	14584	aaatAAAGGGGTGcagt	5.34	-7.53		95	2633	1364
DMU31961	D	-321025	-321017	17209	17217	taaaAAACGGTTAtagc	7.1	-10.59		2633	136	1384.5
DMU31961	D	-320889	-320881	17345	17353	ctggAAGGGGTTAaaag	6.78	-9.89		136	25	80.5
DMU31961	R	-320864	-320856	17370	17378	aagcAAAGGGTTTaaga	7.78	-11.37		25	2408	1216.5
DMU31961	D	-318456	-318448	19778	19786	tcttAAAGGCTGTtgtt	5.45	-7.66		2408	904	1656
DMU31961	R	-317552	-317544	20682	20690	gcctAAAGTGTTActgt	5.79	-8.24		904	194	549
DMU31961	D	-317358	-317350	20876	20884	gggcAAAGCGTTTagct	6.67	-9.42		194	0	97
DMU31961	R	-317358	-317350	20876	20884	agctAAACGCTTTgccc	5.96	-8.46		0	1810	905
DMU31961	D	-315548	-315540	22686	22694	tcccAAAGGCTTTcgaa	6.72	-9.6		1810	0	905
DMU31961	R	-315548	-315540	22686	22694	ttcgAAAGCCTTTggga	5.61	-7.85		0	1998	999
DMU31961	R	-313550	-313542	24684	24692	ccacAATGGCTTAgagg	5.33	-7.5		1998	681	1339.5
DMU31961	R	-312869	-312861	25365	25373	tcgtAACGGGTTTgagg	7.21	-10.85		681	1	341
DMU31961	D	-312868	-312860	25366	25374	ctcaAACCCGTTAcgac	5.43	-7.64		1	2711	1356
DMU31961	D	-310157	-310149	28077	28085	gcaaAAAGGGTTTcgaa	7.78	-11.37		2711	1901	2306
DMU31961	D	-308256	-308248	29978	29986	cgggAAGGGGTGAacac	5.5	-7.72		1901	1155	1528
DMU31961	R	-307101	-307093	31133	31141	ttgtAAGGGGTTTttat	6.69	-9.54		1155	1	578
DMU31961	R	-307100	-307092	31134	31142	tttgTAAGGGGTTttta	5.27	-7.43		1	625	313
DMU31961	D	-306475	-306467	31759	31767	gcgaAAAGGGTTCtcca	6.68	-9.49		625	510	567.5
DMU31961	R	-305965	-305957	32269	32277	tgtaAAGGCGTTTtatg	5.58	-7.8		510	1	255.5
DMU31961	R	-305964	-305956	32270	32278	atgtAAAGGCGTTttat	5.25	-7.41		1	1995	998
DMU31961	D	-303969	-303961	34265	34273	gaggAAAGAGTTTtaca	5.59	-7.81		1995	266	1130.5
DMU31961	D	-303703	-303695	34531	34539	ttaaAAAGCGTTTattt	6.67	-9.42		266	0	133
DMU31961	R	-303703	-303695	34531	34539	aaatAAACGCTTTttaa	5.96	-8.46		0	352	176
DMU31961	R	-303351	-303343	34883	34891	gctgAAAGAGTTTccct	5.59	-7.81		352	2090	1221
DMU31961	R	-301261	-301253	36973	36981	ctggAAAGCGTTCgcct	5.57	-7.79		2090	681	1385.5
DMU31961	D	-300580	-300572	37654	37662	ggacAAACGGGTTttgg	5.54	-7.77		681	0	340.5
DMU31961	R	-300580	-300572	37654	37662	ccaaAACCCGTTTgtcc	5.34	-7.54		0	1	0.5
DMU31961	D	-300579	-300571	37655	37663	gacaAACGGGTTTtggg	7.21	-10.85		1	2307	1154
DMU31961	R	-298272	-298264	39962	39970	agaaAAAGGGTTTgtat	7.78	-11.37		2307	20	1163.5
DMU31961	R	-298252	-298244	39982	39990	ttcaATACGGTTTacgt	5.32	-7.48		20	96	58
DMU31961	R	-298156	-298148	40078	40086	ttatAAAGGGTATcgaa	5.35	-7.56		96	929	512.5
DMU31961	R	-297227	-297219	41007	41015	tgggATAGGGTTTtgcg	6.09	-8.72		929	530	729.5
DMU31961	R	-296697	-296689	41537	41545	atttTATGGGTTTtata	5.26	-7.43		530	24	277
DMU31961	D	-296673	-296665	41561	41569	cgtcAACGCGTTTcgtg	6.1	-8.8		24	1031	527.5
DMU31961	D	-295642	-295634	42592	42600	agcaAAAGTGTTTtcaa	5.71	-8.03		1031	1003	1017
DMU31961	R	-294639	-294631	43595	43603	ggccAAAGTGTTAattg	5.79	-8.24		1003	75	539
DMU31961	D	-294564	-294556	43670	43678	catcAATGGGTTAagga	6.39	-9.15		75	741	408
DMU31961	D	-293823	-293815	44411	44419	cgtaAAACGCTTTgctg	5.96	-8.46		741	0	370.5
DMU31961	R	-293823	-293815	44411	44419	cagcAAAGCGTTTtacg	6.67	-9.42		0	237	118.5
DMU31961	R	-293586	-293578	44648	44656	tttaAAAGGGTTAaaga	7.87	-12.05		237	327	282
DMU31961	D	-293259	-293251	44975	44983	tcccAAAGGGATAttgc	6.1	-8.76		327	664	495.5
DMU31961	D	-292595	-292587	45639	45647	gaaaAAAGGGTTCcgag	6.68	-9.49		664	437	550.5
DMU31961	R	-292158	-292150	46076	46084	ttcaAATGGGTTTatgg	6.3	-9.06		437	132	284.5
DMU31961	D	-292026	-292018	46208	46216	aatgAAAGGCTTTattg	6.72	-9.6		132	0	66
DMU31961	R	-292026	-292018	46208	46216	caatAAAGCCTTTcatt	5.61	-7.85		0	1366	683
DMU31961	D	-290660	-290652	47574	47582	tattAAGGCGTTAaaat	5.67	-7.95		1366	51	708.5
DMU31961	R	-290609	-290601	47625	47633	ttttAAAGGGATAaact	6.1	-8.76		51	409	230
DMU31961	D	-290200	-290192	48034	48042	tgtcAAACGGGTTgaga	5.54	-7.77		409	0	204.5
DMU31961	R	-290200	-290192	48034	48042	tctcAACCCGTTTgaca	5.34	-7.54		0	1	0.5
DMU31961	D	-290199	-290191	48035	48043	gtcaAACGGGTTGagag	6.25	-8.99		1	3287	1644
DMU31961	D	-286912	-286904	51322	51330	ctgaTAAGGCTTTtctt	5.69	-7.98		3287	0	1643.5
DMU31961	R	-286912	-286904	51322	51330	aagaAAAGCCTTAtcag	5.7	-8.01		0	197	98.5
DMU31961	D	-286715	-286707	51519	51527	ttttAAAGAGTTTacac	5.59	-7.81		197	157	177
DMU31961	D	-286558	-286550	51676	51684	aatcTAAGGGTTAtagg	6.83	-10.21		157	1205	681
DMU31961	R	-285353	-285345	52881	52889	acatAAAGGCGTAacgc	5.34	-7.54		1205	4350	2777.5
DMU31961	D	-281003	-280995	57231	57239	tgccAAGGGGTTGtcaa	5.73	-8.11		4350	4466	4408
DMU31961	D	-276537	-276529	61697	61705	ggtgAAAGGGTTCtatt	6.68	-9.49	IAB8	4466	164	2315
DMU31961	D	-276373	-276365	61861	61869	agggAAAGCGTGAaggc	5.48	-7.69	IAB8	164	127	145.5
DMU31961	D	-276246	-276238	61988	61996	aacaAAAGGGTTTggag	7.78	-11.37	IAB8	127	105	116	858.833
DMU31961	R	-276141	-276133	62093	62101	caatTATGGGTTTtatg	5.26	-7.43		105	285	195
DMU31961	D	-275856	-275848	62378	62386	ggctTAAGGGTTTggtt	6.74	-9.69		285	614	449.5
DMU31961	R	-275242	-275234	62992	63000	atccTAAGGGTTCtatt	5.64	-7.93		614	1912	1263
DMU31961	D	-273330	-273322	64904	64912	tggcAACGGGTCTggaa	5.35	-7.55		1912	1166	1539
DMU31961	R	-272164	-272156	66070	66078	acttAATGGGTTTcagg	6.3	-9.06		1166	1739	1452.5
DMU31961	D	-270425	-270417	67809	67817	ctttAAAGTGTTAgcag	5.79	-8.24		1739	262	1000.5
DMU31961	R	-270163	-270155	68071	68079	ttaaAAGGGGTTAaagc	6.78	-9.89		262	1	131.5
DMU31961	R	-270162	-270154	68072	68080	gttaAAAGGGGTTaaag	6.3	-9.11		1	929	465
DMU31961	D	-269233	-269225	69001	69009	aaggGAAGGGTTAgcag	5.39	-7.59		929	3472	2200.5
DMU31961	D	-265761	-265753	72473	72481	aggcAAAGGGTATtttt	5.35	-7.56		3472	43	1757.5
DMU31961	R	-265718	-265710	72516	72524	ggtgAAAGGGATAaaaa	6.1	-8.76		43	232	137.5
DMU31961	R	-265486	-265478	72748	72756	tatcAAAGCGTGTtatt	5.39	-7.59		232	718	475
DMU31961	D	-264768	-264760	73466	73474	atatAAACGGATAttta	5.33	-7.51		718	129	423.5
DMU31961	D	-264639	-264631	73595	73603	atttTATGGGTTTataa	5.26	-7.43		129	399	264
DMU31961	D	-264240	-264232	73994	74002	tatcAAAGGGTTGcgat	6.81	-10.06		399	430	414.5
DMU31961	R	-263810	-263802	74424	74432	tgatAAAGGGATTtact	6.01	-8.57		430	857	643.5
DMU31961	R	-262953	-262945	75281	75289	cgtgTACGGGTTTctgc	6.18	-8.88		857	306	581.5
DMU31961	D	-262647	-262639	75587	75595	tccgAAAGGCGTTggag	5.25	-7.41		306	4322	2314
DMU31961	R	-258325	-258317	79909	79917	ggcaAAGGGCTTTcggt	5.64	-7.92	IAB7a	4322	1	2161.5
DMU31961	R	-258324	-258316	79910	79918	cggcAAAGGGCTTtcgg	5.25	-7.41	IAB7a	1	789	395
DMU31961	D	-257535	-257527	80699	80707	ggagAACGGGTTTatct	7.21	-10.85	IAB7a	789	350	569.5
DMU31961	D	-257185	-257177	81049	81057	caccAAAGGGTAAgaga	5.43	-7.65	IAB7a	350	1416	883
DMU31961	D	-255769	-255761	82465	82473	aaaaTAAGGCTTTgcta	5.69	-7.98	IAB7a	1416	0	708
DMU31961	R	-255769	-255761	82465	82473	tagcAAAGCCTTAtttt	5.7	-8.01	IAB7a	0	523	261.5	829.75
DMU31961	D	-255246	-255238	82988	82996	tgctAAAGTGTTTcggt	5.71	-8.03		523	1853	1188
DMU31961	D	-253393	-253385	84841	84849	caccAATGGGTTTcttt	6.3	-9.06		1853	583	1218
DMU31961	R	-252810	-252802	85424	85432	gaatAAAGTGTTTatct	5.71	-8.03		583	2706	1644.5
DMU31961	R	-250104	-250096	88130	88138	ccatAAAGGGATAttta	6.1	-8.76		2706	701	1703.5
DMU31961	D	-249403	-249395	88831	88839	cgtaAATCGGTTAagtt	5.62	-7.86		701	214	457.5
DMU31961	R	-249189	-249181	89045	89053	aaaaAAAGGCTGAtaag	5.53	-7.75		214	983	598.5
DMU31961	D	-248206	-248198	90028	90036	tgatAAAGGCTGAatta	5.53	-7.75	IAB6	983	278	630.5
DMU31961	D	-247928	-247920	90306	90314	ttgaAAAGCCTTTctct	5.61	-7.85	IAB6	278	0	139
DMU31961	R	-247928	-247920	90306	90314	agagAAAGGCTTTtcaa	6.72	-9.6	IAB6	0	297	148.5
DMU31961	R	-247631	-247623	90603	90611	aaggAACGGGTTTcggc	7.21	-10.85	IAB6	297	566	431.5
DMU31961	R	-247065	-247057	91169	91177	atcgAACGGGTTGggat	6.25	-8.99	IAB6	566	238	402
DMU31961	R	-246827	-246819	91407	91415	tggaAAGGGGTTTtacg	6.69	-9.54	IAB6	238	1	119.5
DMU31961	R	-246826	-246818	91408	91416	atggAAAGGGGTTttac	6.3	-9.11	IAB6	1	102	51.5
DMU31961	D	-246724	-246716	91510	91518	gcagAAGGGGTTAtgga	6.78	-9.89	IAB6	102	1304	703	328.188
DMU31961	D	-245420	-245412	92814	92822	ggttAATGGGTTGgggt	5.33	-7.5		1304	120	712
DMU31961	D	-245300	-245292	92934	92942	ggcaAATGGGTTGgagt	5.33	-7.5		120	66	93
DMU31961	D	-245234	-245226	93000	93008	gtgaAAAGTGTTTtaca	5.71	-8.03		66	96	81
DMU31961	R	-245138	-245130	93096	93104	ggaaAAGGGGTTActtc	6.78	-9.89		96	1	48.5
DMU31961	R	-245137	-245129	93097	93105	aggaAAAGGGGTTactt	6.3	-9.11		1	871	436
DMU31961	D	-244266	-244258	93968	93976	agtaAATGGGTTGgccc	5.33	-7.5		871	1689	1280
DMU31961	D	-242577	-242569	95657	95665	atggTAAGGGTTGccaa	5.77	-8.22		1689	147	918
DMU31961	D	-242430	-242422	95804	95812	agatAAAGAGTTTcgcc	5.59	-7.81		147	482	314.5
DMU31961	D	-241948	-241940	96286	96294	accgAACGGGTTCaagt	6.12	-8.83		482	3498	1990
DMU31961	R	-238450	-238442	99784	99792	aagtTAAGGCTTAgttg	5.77	-8.22		3498	978	2238
DMU31961	D	-237472	-237464	100762	100770	gcaaATCGGGTTTagct	5.52	-7.73		978	479	728.5
DMU31961	R	-236993	-236985	101241	101249	atttAAAGCGTTCcaat	5.57	-7.79		479	1749	1114
DMU31961	D	-235244	-235236	102990	102998	aaaaTAAGCGTTTaagg	5.63	-7.89		1749	0	874.5
DMU31961	R	-235244	-235236	102990	102998	ccttAAACGCTTAtttt	6.05	-8.65		0	1549	774.5
DMU31961	D	-233695	-233687	104539	104547	ttgcAAAGGGTTGagtt	6.81	-10.06	IAB5	1549	1614	1581.5	1581.5
DMU31961	D	-232081	-232073	106153	106161	ttaaAAAGGCTTGacaa	5.76	-8.19		1614	543	1078.5
DMU31961	R	-231538	-231530	106696	106704	gagaAATGGCTTAatta	5.33	-7.5		543	1185	864
DMU31961	R	-230353	-230345	107881	107889	ggatAAAGAGTTTcggg	5.59	-7.81		1185	856	1020.5
DMU31961	D	-229497	-229489	108737	108745	atggAAAGGATTTtagt	5.75	-8.16		856	416	636
DMU31961	R	-229081	-229073	109153	109161	cttaAACGGGTTAaatc	7.3	-11.07		416	1	208.5
DMU31961	D	-229080	-229072	109154	109162	atttAACCCGTTTaagc	5.34	-7.54		1	0	0.5
DMU31961	R	-229080	-229072	109154	109162	gcttAAACGGGTTaaat	5.54	-7.77		0	1594	797
DMU31961	R	-227486	-227478	110748	110756	gtacAAGGGCTTAtatc	5.73	-8.11		1594	321	957.5
DMU31961	D	-227165	-227157	111069	111077	gtccAACGGGTCAgagg	5.43	-7.65		321	3174	1747.5
DMU31961	R	-223991	-223983	114243	114251	aaatAAGGGCTTTtctg	5.64	-7.92		3174	202	1688
DMU31961	D	-223789	-223781	114445	114453	ttgcAAAGGATTAtggc	5.84	-8.33		202	2949	1575.5
DMU31961	D	-220840	-220832	117394	117402	tttcAAGGGCTTAaatt	5.73	-8.11		2949	180	1564.5
DMU31961	R	-220660	-220652	117574	117582	aagaAAAGGGTGGtttt	5.53	-7.75		180	66	123
DMU31961	D	-220594	-220586	117640	117648	ttaaAACGGCTTTtaca	6.16	-8.84		66	57	61.5
DMU31961	R	-220537	-220529	117697	117705	atgaAATGGCTTAcaag	5.33	-7.5		57	488	272.5
DMU31961	R	-220049	-220041	118185	118193	agacAAAGGGTTGcagc	6.81	-10.06		488	236	362
DMU31961	D	-219813	-219805	118421	118429	cgggAAAGGGTCTcgca	5.91	-8.4		236	748	492
DMU31961	D	-219065	-219057	119169	119177	gaagAAAGGGTTAataa	7.87	-12.05		748	758	753
DMU31961	R	-218307	-218299	119927	119935	tgccAAACGGGTAtggg	5.63	-7.88		758	1440	1099
DMU31961	D	-216867	-216859	121367	121375	gacgAAGGGCTTAatgt	5.73	-8.11		1440	409	924.5
DMU31961	D	-216458	-216450	121776	121784	ggctAAAGGGTAAatat	5.43	-7.65		409	692	550.5
DMU31961	D	-215766	-215758	122468	122476	atatGAAGGGTTTcgaa	5.3	-7.47		692	1891	1291.5
DMU31961	R	-213875	-213867	124359	124367	acttATCGGGTTTttat	5.52	-7.73		1891	197	1044
DMU31961	D	-213678	-213670	124556	124564	ttagAATGGGTTTtatt	6.3	-9.06		197	41	119
DMU31961	D	-213637	-213629	124597	124605	aggaAATGGCTTAaacc	5.33	-7.5		41	156	98.5
DMU31961	R	-213481	-213473	124753	124761	ctggTAACGGTTAcatt	6.06	-8.69		156	38	97
DMU31961	D	-213443	-213435	124791	124799	tatgAAGGCGTTAtaaa	5.67	-7.95		38	1904	971
DMU31961	D	-211539	-211531	126695	126703	aatgAAAGGCTTTctgt	6.72	-9.6		1904	0	952
DMU31961	R	-211539	-211531	126695	126703	acagAAAGCCTTTcatt	5.61	-7.85		0	369	184.5
DMU31961	D	-211170	-211162	127064	127072	ttaaAAAGTGTTTcaca	5.71	-8.03		369	699	534
DMU31961	R	-210471	-210463	127763	127771	caacAAAGGGTGAttat	6.59	-9.37		699	1521	1110
DMU31961	R	-208950	-208942	129284	129292	actgAAAGCGTTGatgg	5.7	-8.01		1521	1688	1604.5
DMU31961	R	-207262	-207254	130972	130980	aaacAAAGTGTTAattc	5.79	-8.24		1688	859	1273.5
DMU31961	R	-206403	-206395	131831	131839	tagaACAGGGTTTctat	5.72	-8.07		859	18	438.5
DMU31961	R	-206385	-206377	131849	131857	atcaAATGGGTTAatgt	6.39	-9.15		18	805	411.5
DMU31961	R	-205580	-205572	132654	132662	catgAAGGGGTTAgggg	6.78	-9.89		805	1697	1251
DMU31961	R	-203883	-203875	134351	134359	tattAAAGAGTTTacca	5.59	-7.81		1697	165	931
DMU31961	R	-203718	-203710	134516	134524	cagcTAAGGGTTGttaa	5.77	-8.22		165	1781	973
DMU31961	D	-201937	-201929	136297	136305	agcaAAACGCTTTgagt	5.96	-8.46		1781	0	890.5
DMU31961	R	-201937	-201929	136297	136305	actcAAAGCGTTTtgct	6.67	-9.42		0	715	357.5
DMU31961	D	-201222	-201214	137012	137020	caacAAAGGGTTAgtaa	7.87	-12.05		715	3391	2053
DMU31961	R	-197831	-197823	140403	140411	tccgAAAGAGTTTctgg	5.59	-7.81		3391	1460	2425.5
DMU31961	R	-196371	-196363	141863	141871	acgcAAAGGGGTAtcat	6.39	-9.2		1460	73	766.5
DMU31961	D	-196298	-196290	141936	141944	atagAAACGGTTCctta	5.92	-8.41		73	131	102
DMU31961	R	-196167	-196159	142067	142075	aatgAACGGCTTAtgta	6.25	-8.99		131	508	319.5
DMU31961	R	-195659	-195651	142575	142583	cgtaAATGCGTTAttgg	5.27	-7.45		508	486	497
DMU31961	D	-195173	-195165	143061	143069	acatTAAGGGTTAtgcg	6.83	-10.21		486	221	353.5
DMU31961	R	-194952	-194944	143282	143290	cgtcAACCGGTTGcatt	5.48	-7.7		221	1	111
DMU31961	D	-194951	-194943	143283	143291	atgcAACCGGTTGacga	5.48	-7.7		1	177	89
DMU31961	D	-194774	-194766	143460	143468	agtgAAGCGGTTAaatg	6.01	-8.6		177	164	170.5
DMU31961	D	-194610	-194602	143624	143632	gggcAAGGGGTTTcgag	6.69	-9.54		164	93	128.5
DMU31961	R	-194517	-194509	143717	143725	gcgaAAAGGGTCAtaaa	6	-8.55		93	25	59
DMU31961	R	-194492	-194484	143742	143750	cgctGAAGGGTTAaact	5.39	-7.59		25	1059	542
DMU31961	D	-193433	-193425	144801	144809	tgaaAAACGGTTTgcga	7.01	-10.38		1059	0	529.5
DMU31961	R	-193433	-193425	144801	144809	tcgcAAACCGTTTttca	5.9	-8.37		0	287	143.5
DMU31961	D	-193146	-193138	145088	145096	atgcAAAGGGGTAaata	6.39	-9.2		287	428	357.5
DMU31961	D	-192718	-192710	145516	145524	gtaaAAACGGGTTttcg	5.54	-7.77		428	0	214
DMU31961	R	-192718	-192710	145516	145524	cgaaAACCCGTTTttac	5.34	-7.54		0	1	0.5
DMU31961	D	-192717	-192709	145517	145525	taaaAACGGGTTTtcgt	7.21	-10.85		1	762	381.5
DMU31961	D	-191955	-191947	146279	146287	tgttAAAGGGTTTgtga	7.78	-11.37		762	117	439.5
DMU31961	D	-191838	-191830	146396	146404	cccaAAACGGTTTcagt	7.01	-10.38		117	0	58.5
DMU31961	R	-191838	-191830	146396	146404	actgAAACCGTTTtggg	5.9	-8.37		0	937	468.5
DMU31961	R	-190901	-190893	147333	147341	gtggAAAGGATTTccta	5.75	-8.16		937	21	479
DMU31961	R	-190880	-190872	147354	147362	gtggAAAGGGTTAtttg	7.87	-12.05		21	509	265
DMU31961	R	-190371	-190363	147863	147871	tataAAAGGATTAaaca	5.84	-8.33		509	465	487
DMU31961	D	-189906	-189898	148328	148336	taaaAATCGGTTTatgg	5.53	-7.74		465	159	312
DMU31961	D	-189747	-189739	148487	148495	taaaAAAGGATTTgaaa	5.75	-8.16		159	319	239
DMU31961	R	-189428	-189420	148806	148814	cttaAAAGCGGTAaaat	5.28	-7.46		319	2724	1521.5
DMU31961	R	-186704	-186696	151530	151538	aagaGAAGGGTTAttat	5.39	-7.59		2724	1352	2038
DMU31961	D	-185352	-185344	152882	152890	aattTAAGGGTTTtttt	6.74	-9.69		1352	1176	1264
DMU31961	D	-184176	-184168	154058	154066	ctgcAAAGTGTTTtatg	5.71	-8.03		1176	7016	4096
DMU31961	D	-177160	-177152	161074	161082	aagcAATGGGTTAtttc	6.39	-9.15		7016	123	3569.5
DMU31961	R	-177037	-177029	161197	161205	caaaGAAGGGTTTcctt	5.3	-7.47		123	1194	658.5
DMU31961	R	-175843	-175835	162391	162399	aattAAACGGTTCgcaa	5.92	-8.41		1194	456	825
DMU31961	D	-175387	-175379	162847	162855	gacaAAAGCGTTTcttt	6.67	-9.42		456	0	228
DMU31961	R	-175387	-175379	162847	162855	aaagAAACGCTTTtgtc	5.96	-8.46		0	1308	654
DMU31961	D	-174079	-174071	164155	164163	ggcgAAAGGGGTTtgga	6.3	-9.11		1308	1	654.5
DMU31961	D	-174078	-174070	164156	164164	gcgaAAGGGGTTTggat	6.69	-9.54		1	2179	1090
DMU31961	D	-171899	-171891	166335	166343	gtccAAAGGGCTAgacg	5.34	-7.52		2179	54	1116.5
DMU31961	R	-171845	-171837	166389	166397	aggaTAAGGGGTAccaa	5.35	-7.58		54	178	116
DMU31961	R	-171667	-171659	166567	166575	ttttAAAGGATTTtact	5.75	-8.16		178	349	263.5
DMU31961	R	-171318	-171310	166916	166924	attaAAGGCGTTTaatg	5.58	-7.8		349	1	175
DMU31961	R	-171317	-171309	166917	166925	aattAAAGGCGTTtaat	5.25	-7.41		1	606	303.5
DMU31961	D	-170711	-170703	167523	167531	acagTAAGGGTGAatgg	5.55	-7.78		606	3449	2027.5
DMU31961	R	-167262	-167254	170972	170980	tcaaAAAGCGTTAagtg	6.76	-9.79		3449	236	1842.5
DMU31961	D	-167026	-167018	171208	171216	gattTAAGGCTTTccga	5.69	-7.98	IAB2	236	0	118
DMU31961	R	-167026	-167018	171208	171216	tcggAAAGCCTTAaatc	5.7	-8.01	IAB2	0	1466	733
DMU31961	R	-165560	-165552	172674	172682	cgtgAAAGGGTGAagct	6.59	-9.37	IAB2	1466	4150	2808	1219.67
DMU31961	R	-161410	-161402	176824	176832	aattAAAGGCGTTctgc	5.25	-7.41		4150	2890	3520
DMU31961	R	-158520	-158512	179714	179722	atgaTATGGGTTAtttt	5.35	-7.56		2890	2973	2931.5
DMU31961	R	-155547	-155539	182687	182695	tgtgAAAGGGTTAagaa	7.87	-12.05		2973	1353	2163
DMU31961	D	-154194	-154186	184040	184048	tccaTATGGGTTTtatt	5.26	-7.43		1353	1020	1186.5
DMU31961	D	-153174	-153166	185060	185068	cacaAAAGTGTTAggga	5.79	-8.24		1020	1536	1278
DMU31961	D	-151638	-151630	186596	186604	cattTAACGGTTAttgc	6.06	-8.69		1536	261	898.5
DMU31961	R	-151377	-151369	186857	186865	tggtTAAGGCTTAtttc	5.77	-8.22		261	341	301
DMU31961	D	-151036	-151028	187198	187206	ctcgAAAGCCTTTaact	5.61	-7.85		341	0	170.5
DMU31961	R	-151036	-151028	187198	187206	agttAAAGGCTTTcgag	6.72	-9.6		0	1292	646
DMU31961	D	-149744	-149736	188490	188498	acggAAACGGTTCcact	5.92	-8.41		1292	1236	1264
DMU31961	D	-148508	-148500	189726	189734	tcagAACGCGTTTgcct	6.1	-8.8		1236	2290	1763
DMU31961	D	-146218	-146210	192016	192024	tttaAATGGCTTAagtt	5.33	-7.5		2290	7438	4864
DMU31961	D	-138780	-138772	199454	199462	tcgaAAAGGGGTGtttg	5.34	-7.53		7438	1	3719.5
DMU31961	D	-138779	-138771	199455	199463	cgaaAAGGGGTGTttgg	5.41	-7.63		1	1246	623.5
DMU31961	R	-137533	-137525	200701	200709	ttgaAACGGGTTAggag	7.3	-11.07		1246	1	623.5
DMU31961	D	-137532	-137524	200702	200710	tcctAACCCGTTTcaac	5.34	-7.54		1	0	0.5
DMU31961	R	-137532	-137524	200702	200710	gttgAAACGGGTTagga	5.54	-7.77		0	917	458.5
DMU31961	D	-136615	-136607	201619	201627	gcttTAACGGTTAcggt	6.06	-8.69		917	490	703.5
DMU31961	R	-136125	-136117	202109	202117	tgaaAAAGGGTTCaagt	6.68	-9.49		490	1258	874
DMU31961	D	-134867	-134859	203367	203375	aggtAATCGGTTAggtg	5.62	-7.86		1258	77	667.5
DMU31961	R	-134790	-134782	203444	203452	cacaAAAGGGTGTtgtt	6.5	-9.28		77	879	478
DMU31961	D	-133911	-133903	204323	204331	gattAAAGTGTTTtcca	5.71	-8.03		879	3393	2136
DMU31961	D	-130518	-130510	207716	207724	agttAAGGCGTTTattt	5.58	-7.8		3393	1714	2553.5
DMU31961	D	-128804	-128796	209430	209438	aagtAAAGGCTTAaatt	6.81	-10.07		1714	644	1179
DMU31961	R	-128160	-128152	210074	210082	tccgAAACGGTTCgcca	5.92	-8.41		644	28	336
DMU31961	R	-128132	-128124	210102	210110	ttccAAAGGCTGTtggt	5.45	-7.66		28	67	47.5
DMU31961	R	-128065	-128057	210169	210177	tgcaAAAGGGTCAcgga	6	-8.55		67	244	155.5
DMU31961	D	-127821	-127813	210413	210421	tgaaAAAGTGTTAagtg	5.79	-8.24		244	1029	636.5
DMU31961	D	-126792	-126784	211442	211450	atcaAAAGGCTTGgcct	5.76	-8.19		1029	525	777
DMU31961	D	-126267	-126259	211967	211975	acgaAAAGCCTTTtctt	5.61	-7.85		525	0	262.5
DMU31961	R	-126267	-126259	211967	211975	aagaAAAGGCTTTtcgt	6.72	-9.6		0	720	360
DMU31961	D	-125547	-125539	212687	212695	cgtaAAAGGGCTAtaaa	5.34	-7.52		720	1821	1270.5
DMU31961	D	-123726	-123718	214508	214516	cctcAATCGGTTTcaat	5.53	-7.74		1821	264	1042.5
DMU31961	R	-123462	-123454	214772	214780	gtggAAAGTGTTTttca	5.71	-8.03		264	1208	736
DMU31961	D	-122254	-122246	215980	215988	taccAATGGGTTAttga	6.39	-9.15		1208	886	1047
DMU31961	D	-121368	-121360	216866	216874	attgTAAGGGTTTatct	6.74	-9.69		886	2400	1643
DMU31961	R	-118968	-118960	219266	219274	agagATACGGTTAgcct	5.41	-7.61		2400	4202	3301
DMU31961	R	-114766	-114758	223468	223476	atggAAAGTGTTAaatg	5.79	-8.24		4202	286	2244
DMU31961	D	-114480	-114472	223754	223762	aaggAAAGGGTGGctaa	5.53	-7.75		286	262	274
DMU31961	D	-114218	-114210	224016	224024	agagAAAGTGTTTtcaa	5.71	-8.03		262	307	284.5
DMU31961	D	-113911	-113903	224323	224331	cggaTAAGCGTTTgccg	5.63	-7.89		307	0	153.5
DMU31961	R	-113911	-113903	224323	224331	cggcAAACGCTTAtccg	6.05	-8.65		0	416	208
DMU31961	D	-113495	-113487	224739	224747	atgcAAAGGCTTCtcct	5.63	-7.89		416	144	280
DMU31961	D	-113351	-113343	224883	224891	tccaAAAGTGTTTtatg	5.71	-8.03		144	260	202
DMU31961	D	-113091	-113083	225143	225151	tcgaATAGGGTTTtaag	6.09	-8.72		260	570	415
DMU31961	D	-112521	-112513	225713	225721	cgaaAAAGGGTATtttc	5.35	-7.56		570	999	784.5
DMU31961	R	-111522	-111514	226712	226720	tttgAAAGGGTTCaaga	6.68	-9.49		999	60	529.5
DMU31961	R	-111462	-111454	226772	226780	ttatAAAGGATTTtcga	5.75	-8.16		60	706	383
DMU31961	R	-110756	-110748	227478	227486	attcAAAGTGTTTcaaa	5.71	-8.03		706	1286	996
DMU31961	R	-109470	-109462	228764	228772	tttaAAAGGATTAttta	5.84	-8.33		1286	169	727.5
DMU31961	R	-109301	-109293	228933	228941	aattGAAGGGTTTcaca	5.3	-7.47		169	1207	688
DMU31961	D	-108094	-108086	230140	230148	acagAAACGGTTCcatc	5.92	-8.41		1207	576	891.5
DMU31961	D	-107518	-107510	230716	230724	cttaAATGCGTTAtaac	5.27	-7.45		576	70	323
DMU31961	R	-107448	-107440	230786	230794	actaAAAGGGTTTtggg	7.78	-11.37		70	2021	1045.5
DMU31961	R	-105427	-105419	232807	232815	gttcAACGGGTTCctgt	6.12	-8.83		2021	184	1102.5
DMU31961	D	-105243	-105235	232991	232999	tacaAATGGGTTAatac	6.39	-9.15		184	38	111
DMU31961	D	-105205	-105197	233029	233037	aactAAAGGGTAAttta	5.43	-7.65		38	391	214.5
DMU31961	R	-104814	-104806	233420	233428	tggcAACGGCTTTtatg	6.16	-8.84		391	1798	1094.5
DMU31961	D	-103016	-103008	235218	235226	attcAAAGGGTCTatga	5.91	-8.4		1798	85	941.5
DMU31961	R	-102931	-102923	235303	235311	tgaaAAAGGATTTcgct	5.75	-8.16		85	206	145.5
DMU31961	D	-102725	-102717	235509	235517	acttTAAGGGTGTgggt	5.46	-7.68		206	107	156.5
DMU31961	R	-102618	-102610	235616	235624	ggcaAATGGCTTAatta	5.33	-7.5		107	1185	646
DMU31961	D	-101433	-101425	236801	236809	aaaaAAAGGATTAtttt	5.84	-8.33		1185	90	637.5
DMU31961	R	-101343	-101335	236891	236899	gaaaAAAGGATTTcaat	5.75	-8.16		90	2824	1457
DMU31961	D	-98519	-98511	239715	239723	ttaaAACGGATTAttag	5.27	-7.45		2824	2446	2635
DMU31961	D	-96073	-96065	242161	242169	taatAAAGCCTTTaagt	5.61	-7.85		2446	0	1223
DMU31961	R	-96073	-96065	242161	242169	acttAAAGGCTTTatta	6.72	-9.6		0	1008	504
DMU31961	R	-95065	-95057	243169	243177	ctcgTAAGCGTTAcgat	5.72	-8.09		1008	471	739.5
DMU31961	D	-94594	-94586	243640	243648	ttaaAAAGAGTTTaaca	5.59	-7.81		471	2665	1568
DMU31961	R	-91929	-91921	246305	246313	gtatGAAGGGTTTtcgg	5.3	-7.47		2665	2643	2654
DMU31961	D	-89286	-89278	248948	248956	atgcAAAGGGGTGaaag	5.34	-7.53		2643	1	1322
DMU31961	D	-89285	-89277	248949	248957	tgcaAAGGGGTGAaaga	5.5	-7.72		1	148	74.5
DMU31961	R	-89137	-89129	249097	249105	caccAAAGGGTTAatgg	7.87	-12.05		148	1268	708
DMU31961	D	-87869	-87861	250365	250373	tgggAAAGTGTTTatgc	5.71	-8.03		1268	612	940
DMU31961	R	-87257	-87249	250977	250985	gggtAAAGGGTATtaaa	5.35	-7.56		612	554	583
DMU31961	D	-86703	-86695	251531	251539	attaAATGGGTTAttcg	6.39	-9.15		554	1447	1000.5
DMU31961	D	-85256	-85248	252978	252986	actgAAGGCGTTTattt	5.58	-7.8		1447	3016	2231.5
DMU31961	R	-82240	-82232	255994	256002	gcttAAAGTGTTTtgct	5.71	-8.03		3016	883	1949.5
DMU31961	D	-81357	-81349	256877	256885	ttgaAAAGCGTTTgttg	6.67	-9.42		883	0	441.5
DMU31961	R	-81357	-81349	256877	256885	caacAAACGCTTTtcaa	5.96	-8.46		0	929	464.5
DMU31961	R	-80428	-80420	257806	257814	ggtaAAAGGGTGGggcg	5.53	-7.75		929	1179	1054
DMU31961	R	-79249	-79241	258985	258993	cccaAAAGGGGTAaaag	6.39	-9.2		1179	116	647.5
DMU31961	R	-79133	-79125	259101	259109	aaaaAAAGGATTTtata	5.75	-8.16		116	1448	782
DMU31961	D	-77685	-77677	260549	260557	ccagAAAGAGTTTtgcc	5.59	-7.81		1448	173	810.5
DMU31961	R	-77512	-77504	260722	260730	ggaaAAAGTGTTTttct	5.71	-8.03		173	70	121.5
DMU31961	D	-77442	-77434	260792	260800	ccccAAAGGGTCAacaa	6	-8.55		70	178	124
DMU31961	D	-77264	-77256	260970	260978	acaaAAACGGTTTccat	7.01	-10.38		178	0	89
DMU31961	R	-77264	-77256	260970	260978	atggAAACCGTTTttgt	5.9	-8.37		0	167	83.5
DMU31961	D	-77097	-77089	261137	261145	aactAAACGGTTAaagc	7.1	-10.59		167	870	518.5
DMU31961	R	-76227	-76219	262007	262015	cgccAATGGGTTAattt	6.39	-9.15		870	1950	1410
DMU31961	D	-74277	-74269	263957	263965	gtttAAAGGATTTtcat	5.75	-8.16		1950	989	1469.5
DMU31961	D	-73288	-73280	264946	264954	cgcaAAAGAGTTTgcaa	5.59	-7.81		989	300	644.5
DMU31961	D	-72988	-72980	265246	265254	tttcAAAGGGGTAtgca	6.39	-9.2		300	146	223
DMU31961	D	-72842	-72834	265392	265400	ttcaAATGGGTTTcatt	6.3	-9.06		146	1372	759
DMU31961	R	-71470	-71462	266764	266772	aggcTAAGGGTTTacaa	6.74	-9.69		1372	1093	1232.5
DMU31961	D	-70377	-70369	267857	267865	ctcgAAAGGCTGTtaat	5.45	-7.66		1093	2210	1651.5
DMU31961	D	-68167	-68159	270067	270075	ctgtTACCGGTTAtttg	5.5	-7.71		2210	1252	1731
DMU31961	R	-66915	-66907	271319	271327	acgcAAAGGCTGAccga	5.53	-7.75		1252	1195	1223.5
DMU31961	R	-65720	-65712	272514	272522	tggtAATGGGTTAtctt	6.39	-9.15		1195	277	736
DMU31961	R	-65443	-65435	272791	272799	aaatAAAGGGTTAattc	7.87	-12.05		277	142	209.5
DMU31961	D	-65301	-65293	272933	272941	atttAGAGGGTTAagaa	5.8	-8.28		142	2468	1305
DMU31961	D	-62833	-62825	275401	275409	ttagAACGGGTGAactt	6.03	-8.62		2468	282	1375
DMU31961	R	-62551	-62543	275683	275691	cccgAAAGGGTCAgcaa	6	-8.55		282	277	279.5
DMU31961	R	-62274	-62266	275960	275968	taaaAAACGGTTCccta	5.92	-8.41		277	1392	834.5
DMU31961	R	-60882	-60874	277352	277360	aaacTAACGGTTAaatg	6.06	-8.69		1392	596	994
DMU31961	D	-60286	-60278	277948	277956	tgttAAACGGGTTaact	5.54	-7.77		596	0	298
DMU31961	R	-60286	-60278	277948	277956	agttAACCCGTTTaaca	5.34	-7.54		0	1	0.5
DMU31961	D	-60285	-60277	277949	277957	gttaAACGGGTTAacta	7.3	-11.07		1	3182	1591.5
DMU31961	D	-57103	-57095	281131	281139	cttcAAGGGCTTAaaaa	5.73	-8.11		3182	3154	3168
DMU31961	D	-53949	-53941	284285	284293	aaggAAACGCTTTcaga	5.96	-8.46		3154	0	1577
DMU31961	R	-53949	-53941	284285	284293	tctgAAAGCGTTTcctt	6.67	-9.42		0	492	246
DMU31961	D	-53457	-53449	284777	284785	aggaAAAGGGTGGaaaa	5.53	-7.75		492	384	438
DMU31961	D	-53073	-53065	285161	285169	actgAAGGGGTTAttta	6.78	-9.89		384	826	605
DMU31961	R	-52247	-52239	285987	285995	accgATCGGGTTTtatt	5.52	-7.73		826	1532	1179
DMU31961	D	-50715	-50707	287519	287527	gcgaAAACGCTTAaaac	6.05	-8.65		1532	0	766
DMU31961	R	-50715	-50707	287519	287527	gtttTAAGCGTTTtcgc	5.63	-7.89		0	150	75
DMU31961	D	-50565	-50557	287669	287677	atagAAAGGCGTTtcta	5.25	-7.41		150	1	75.5
DMU31961	D	-50564	-50556	287670	287678	tagaAAGGCGTTTctaa	5.58	-7.8		1	589	295
DMU31961	D	-49975	-49967	288259	288267	tgcaTATGGGTTAcgaa	5.35	-7.56		589	450	519.5
DMU31961	R	-49525	-49517	288709	288717	gaaaAAAGGGTTGgcgg	6.81	-10.06		450	501	475.5
DMU31961	D	-49024	-49016	289210	289218	ccgaAAAGGGTTTaatt	7.78	-11.37		501	63	282
DMU31961	R	-48961	-48953	289273	289281	cactTAGGGGTTAaggg	5.74	-8.15		63	1293	678
DMU31961	D	-47668	-47660	290566	290574	gcatAAAGTGTTTtata	5.71	-8.03		1293	74	683.5
DMU31961	R	-47594	-47586	290640	290648	aaaaTAAGGGGTAaagg	5.35	-7.58		74	266	170
DMU31961	D	-47328	-47320	290906	290914	tgagAAGGGGTTTccaa	6.69	-9.54		266	1736	1001
DMU31961	D	-45592	-45584	292642	292650	gaaaAACGGCTTTgcaa	6.16	-8.84		1736	141	938.5
DMU31961	R	-45451	-45443	292783	292791	ggttTAAGGGTGTatta	5.46	-7.68		141	924	532.5
DMU31961	D	-44527	-44519	293707	293715	ggagAAGCGGTTTtcca	5.93	-8.43		924	22	473
DMU31961	R	-44505	-44497	293729	293737	tccaAATCGGTTTattt	5.53	-7.74		22	332	177
DMU31961	D	-44173	-44165	294061	294069	tatcAACGGGATAgttt	5.54	-7.77		332	52	192
DMU31961	R	-44121	-44113	294113	294121	tgacAAACGGTTAattg	7.1	-10.59		52	1321	686.5
DMU31961	D	-42800	-42792	295434	295442	tgaaAAAGGGTTTttcg	7.78	-11.37		1321	220	770.5
DMU31961	R	-42580	-42572	295654	295662	tttcAAAGTGTTTggcc	5.71	-8.03		220	161	190.5
DMU31961	R	-42419	-42411	295815	295823	ggaaAAGGGCTTTcgct	5.64	-7.92		161	1	81
DMU31961	R	-42418	-42410	295816	295824	gggaAAAGGGCTTtcgc	5.25	-7.41		1	2149	1075
DMU31961	D	-40269	-40261	297965	297973	atcgAAGGGGTTGtgta	5.73	-8.11		2149	151	1150
DMU31961	D	-40118	-40110	298116	298124	cctgAAAGGGGTAatta	6.39	-9.2		151	518	334.5
DMU31961	D	-39600	-39592	298634	298642	ccctAAAGGGTAAagag	5.43	-7.65		518	522	520
DMU31961	R	-39078	-39070	299156	299164	cactAACCGGTTTccac	6.45	-9.24		522	1	261.5
DMU31961	D	-39077	-39069	299157	299165	tggaAACCGGTTAgtgg	6.54	-9.32		1	1089	545
DMU31961	D	-37988	-37980	300246	300254	ccgcAAAGCGTTGcact	5.7	-8.01		1089	524	806.5
DMU31961	D	-37464	-37456	300770	300778	ggtcATCGGGTTTcgtt	5.52	-7.73		524	2210	1367
DMU31961	R	-35254	-35246	302980	302988	cacaAATGCGTTAttat	5.27	-7.45		2210	313	1261.5
DMU31961	D	-34941	-34933	303293	303301	cccaAAACCGTTTcaca	5.9	-8.37		313	0	156.5
DMU31961	R	-34941	-34933	303293	303301	tgtgAAACGGTTTtggg	7.01	-10.38		0	416	208
DMU31961	D	-34525	-34517	303709	303717	aggcAAAGGCTTTacgg	6.72	-9.6		416	0	208
DMU31961	R	-34525	-34517	303709	303717	ccgtAAAGCCTTTgcct	5.61	-7.85		0	930	465
DMU31961	R	-33595	-33587	304639	304647	cctcAAAGTGTTActtc	5.79	-8.24		930	182	556
DMU31961	D	-33413	-33405	304821	304829	gggaAAAGCGTGTaccg	5.39	-7.59		182	2541	1361.5
DMU31961	R	-30872	-30864	307362	307370	ttacAAAGGGTGTattg	6.5	-9.28		2541	1111	1826
DMU31961	D	-29761	-29753	308473	308481	tggcAAAGGGTTAgggc	7.87	-12.05		1111	1721	1416
DMU31961	D	-28040	-28032	310194	310202	ttgaAAAGGGTTGcgct	6.81	-10.06		1721	1632	1676.5
DMU31961	R	-26408	-26400	311826	311834	cagtTAGGGGTTTattt	5.65	-7.94		1632	681	1156.5
DMU31961	R	-25727	-25719	312507	312515	gagcAAAGCGTGAccac	5.48	-7.69		681	1321	1001
DMU31961	R	-24406	-24398	313828	313836	aagcAAGGGCTTAtgcc	5.73	-8.11		1321	1087	1204
DMU31961	D	-23319	-23311	314915	314923	ccaaAAAGGGTTCcttc	6.68	-9.49		1087	1126	1106.5
DMU31961	D	-22193	-22185	316041	316049	ctaaAACGGGTGAggaa	6.03	-8.62		1126	364	745
DMU31961	R	-21829	-21821	316405	316413	cgcaAAAGGCTGTatac	5.45	-7.66		364	3046	1705
DMU31961	D	-18783	-18775	319451	319459	cgacAAACCGTTTgccc	5.9	-8.37		3046	0	1523
DMU31961	R	-18783	-18775	319451	319459	gggcAAACGGTTTgtcg	7.01	-10.38		0	1706	853
DMU31961	D	-17077	-17069	321157	321165	tattTAAGCGTTTttat	5.63	-7.89		1706	0	853
DMU31961	R	-17077	-17069	321157	321165	ataaAAACGCTTAaata	6.05	-8.65		0	741	370.5
DMU31961	R	-16336	-16328	321898	321906	acagAAAGTGTTTattt	5.71	-8.03		741	2952	1846.5
DMU31961	D	-13384	-13376	324850	324858	gcaaTACCGGTTAagtg	5.5	-7.71		2952	1070	2011
DMU31961	D	-12314	-12306	325920	325928	atatAAAGGATTAtttt	5.84	-8.33		1070	29	549.5
DMU31961	R	-12285	-12277	325949	325957	taatAACGGGTCTtatt	5.35	-7.55		29	4284	2156.5
DMU31961	D	-8001	-7993	330233	330241	agtgTAAGCGTTTcata	5.63	-7.89		4284	0	2142
DMU31961	R	-8001	-7993	330233	330241	tatgAAACGCTTAcact	6.05	-8.65		0	1060	530
DMU31961	R	-6941	-6933	331293	331301	atatAAAGGATTTgcat	5.75	-8.16		1060	499	779.5
DMU31961	D	-6442	-6434	331792	331800	accaAAAGCGTTCgcaa	5.57	-7.79		499	2025	1262
DMU31961	D	-4417	-4409	333817	333825	cataAATGGCTTAataa	5.33	-7.5		2025	2345	2185
DMU31961	R	-2072	-2064	336162	336170	acgcAACCGCTTAtatg	5.48	-7.7		2345	1002	1673.5
DMU31961	R	-1070	-1062	337164	337172	ctaaAAAGTGTTAtacc	5.79			1002		1002
													Ratio
											Average	875.931
											Enhancers	598.853	1.46268
											BX-C	884.078	0.990785
											IAB8	858.833	1.01991
											IAB7b	NA	NA
											IAB7a	829.75	1.05566
											IAB6	328.188	2.669
											IAB5	1581.5	0.553861
											IAB2	1219.67	0.718173
