# Supplementary material for: Transcription Factor Binding Site Redundancy in Embryonic Enhancers of the Drosophila Bithorax Complex
Source: G3 (Bethesda). 2011 Dec 1;1(7):603–6. doi: 10.1534/g3.111.001404 (PMC3276168; doi:10.1534/g3.111.001404)
Supplement: Supporting Information [file supp_1.7.603_TableS4.xls]

## Sheet: Sheet1
Drewell Supplementary table 4
map	strand	Patser start	Patser end	start	end	sequence	score	ln(P)	Anno	Dis R	Dis L	Avg dis	Avg dis En
DMU31961	R	-337748	-337742	486	492	aattTTTTTTGgcta	7.67	-8.83			92	92
DMU31961	D	-337656	-337650	578	584	aataTTTTTTGtgtg	7.67	-8.83		92	133	112.5
DMU31961	D	-337523	-337517	711	717	cactTTTTTTGtgaa	7.67	-8.83		133	2129	1131
DMU31961	R	-335394	-335388	2840	2846	ggtgTTTTTTGcata	7.67	-8.83		2129	2641	2385
DMU31961	R	-332753	-332747	5481	5487	attaTTTTATGatta	6.62	-8.14		2641	2852	2746.5
DMU31961	D	-329901	-329895	8333	8339	aaacTTTTATGgctg	6.62	-8.14		2852	25	1438.5
DMU31961	D	-329876	-329870	8358	8364	gataTTTTATGgcaa	6.62	-8.14		25	91	58
DMU31961	R	-329785	-329779	8449	8455	gcagTTTTATGgacc	6.62	-8.14		91	138	114.5
DMU31961	R	-329647	-329641	8587	8593	gccaTTTTATGagac	6.62	-8.14		138	1659	898.5
DMU31961	R	-327988	-327982	10246	10252	aaagTTTTTTGgcat	7.67	-8.83		1659	1535	1597
DMU31961	D	-326453	-326447	11781	11787	catgTTTTATGttac	6.62	-8.14		1535	72	803.5
DMU31961	R	-326381	-326375	11853	11859	tgacTTTTATGttat	6.62	-8.14		72	394	233
DMU31961	D	-325987	-325981	12247	12253	ccatTTTTTTGcctt	7.67	-8.83		394	38	216
DMU31961	R	-325949	-325943	12285	12291	cgaaTTTTTTGaaaa	7.67	-8.83		38	1697	867.5
DMU31961	R	-324252	-324246	13982	13988	tgcaTTTTTTGattt	7.67	-8.83		1697	1325	1511
DMU31961	D	-322927	-322921	15307	15313	tcgtTTTTATGgcat	6.62	-8.14		1325	374	849.5
DMU31961	R	-322553	-322547	15681	15687	ggccTTTTATGgagt	6.62	-8.14		374	173	273.5
DMU31961	D	-322380	-322374	15854	15860	gtttTTTTATGgcca	6.62	-8.14		173	205	189
DMU31961	D	-322175	-322169	16059	16065	caagTTTTATGggat	6.62	-8.14		205	658	431.5
DMU31961	R	-321517	-321511	16717	16723	gtcaTTTTATGacgc	6.62	-8.14		658	11	334.5
DMU31961	R	-321506	-321500	16728	16734	acacTTTTTTGgtca	7.67	-8.83		11	20	15.5
DMU31961	D	-321486	-321480	16748	16754	cttgTTTTATGacct	6.62	-8.14		20	204	112
DMU31961	D	-321282	-321276	16952	16958	tcgtTTTTATGaaat	6.62	-8.14		204	115	159.5
DMU31961	R	-321167	-321161	17067	17073	gtacTTTTATGgagt	6.62	-8.14		115	441	278
DMU31961	D	-320726	-320720	17508	17514	tcacTTTTATGggca	6.62	-8.14		441	14	227.5
DMU31961	R	-320712	-320706	17522	17528	ttttTTTTTTGcctt	7.67	-8.83		14	1378	696
DMU31961	D	-319334	-319328	18900	18906	catcTTTTATGacgt	6.62	-8.14		1378	1289	1333.5
DMU31961	R	-318045	-318039	20189	20195	gattTTTTATGatcc	6.62	-8.14		1289	1696	1492.5
DMU31961	D	-316349	-316343	21885	21891	gtatTTTTTTGggtt	7.67	-8.83		1696	1279	1487.5
DMU31961	D	-315070	-315064	23164	23170	cgcaTTTTATGgcat	6.62	-8.14		1279	915	1097
DMU31961	R	-314155	-314149	24079	24085	agaaTTTTTTGgtca	7.67	-8.83		915	380	647.5
DMU31961	D	-313775	-313769	24459	24465	gccgTTTTATGgagg	6.62	-8.14		380	319	349.5
DMU31961	R	-313456	-313450	24778	24784	gggtTTTTATGagca	6.62	-8.14		319	801	560
DMU31961	R	-312655	-312649	25579	25585	tatgTTTTTTGtgtc	7.67	-8.83		801	23	412
DMU31961	R	-312632	-312626	25602	25608	attaTTTTATGttat	6.62	-8.14		23	502	262.5
DMU31961	D	-312130	-312124	26104	26110	ttccTTTTTTGattg	7.67	-8.83		502	814	658
DMU31961	D	-311316	-311310	26918	26924	cttcTTTTATGccaa	6.62	-8.14		814	307	560.5
DMU31961	R	-311009	-311003	27225	27231	ttcaTTTTTTGtttt	7.67	-8.83		307	277	292
DMU31961	D	-310732	-310726	27502	27508	tttaTTTTATGtccc	6.62	-8.14		277	1509	893
DMU31961	D	-309223	-309217	29011	29017	ctgtTTTTTTGgttt	7.67	-8.83		1509	18	763.5
DMU31961	D	-309205	-309199	29029	29035	ttttTTTTTTGtttt	7.67	-8.83		18	1859	938.5
DMU31961	D	-307346	-307340	30888	30894	aattTTTTATGcttc	6.62	-8.14		1859	662	1260.5
DMU31961	R	-306684	-306678	31550	31556	gctcTTTTTTGctcc	7.67	-8.83		662	316	489
DMU31961	R	-306368	-306362	31866	31872	ttcgTTTTATGattt	6.62	-8.14		316	109	212.5
DMU31961	D	-306259	-306253	31975	31981	ttctTTTTATGaccc	6.62	-8.14		109	290	199.5
DMU31961	R	-305969	-305963	32265	32271	ggcgTTTTATGgatg	6.62	-8.14		290	1160	725
DMU31961	D	-304809	-304803	33425	33431	acatTTTTATGatgt	6.62	-8.14		1160	85	622.5
DMU31961	R	-304724	-304718	33510	33516	cggaTTTTATGcccg	6.62	-8.14		85	101	93
DMU31961	R	-304623	-304617	33611	33617	tttgTTTTATGaacc	6.62	-8.14		101	259	180
DMU31961	D	-304364	-304358	33870	33876	aaacTTTTATGattt	6.62	-8.14		259	250	254.5
DMU31961	R	-304114	-304108	34120	34126	tatcTTTTATGctag	6.62	-8.14		250	175	212.5
DMU31961	R	-303939	-303933	34295	34301	ctaaTTTTTTGacga	7.67	-8.83		175	2517	1346
DMU31961	D	-301422	-301416	36812	36818	gtttTTTTTTGcttt	7.67	-8.83		2517	31	1274
DMU31961	D	-301391	-301385	36843	36849	cgcaTTTTTTGtgtg	7.67	-8.83		31	28	29.5
DMU31961	D	-301363	-301357	36871	36877	cttcTTTTTTGctgt	7.67	-8.83		28	52	40
DMU31961	D	-301311	-301305	36923	36929	agcgTTTTATGgccg	6.62	-8.14		52	39	45.5
DMU31961	D	-301272	-301266	36962	36968	gccaTTTTTTGaggc	7.67	-8.83		39	2001	1020
DMU31961	R	-299271	-299265	38963	38969	tgggTTTTATGgccc	6.62	-8.14		2001	601	1301
DMU31961	D	-298670	-298664	39564	39570	ggatTTTTATGagtt	6.62	-8.14		601	736	668.5
DMU31961	D	-297934	-297928	40300	40306	tgatTTTTATGtccg	6.62	-8.14		736	501	618.5
DMU31961	D	-297433	-297427	40801	40807	ttcaTTTTATGaccg	6.62	-8.14		501	217	359
DMU31961	R	-297216	-297210	41018	41024	ttcaTTTTTTGggat	7.67	-8.83		217	524	370.5
DMU31961	R	-296692	-296686	41542	41548	cataTTTTATGggtt	6.62	-8.14		524	368	446
DMU31961	D	-296324	-296318	41910	41916	atctTTTTATGattg	6.62	-8.14		368	1300	834
DMU31961	D	-295024	-295018	43210	43216	ttttTTTTTTGggca	7.67	-8.83		1300	20	660
DMU31961	D	-295004	-294998	43230	43236	ggggTTTTATGtctg	6.62	-8.14		20	171	95.5
DMU31961	R	-294833	-294827	43401	43407	ggaaTTTTATGgcga	6.62	-8.14		171	294	232.5
DMU31961	D	-294539	-294533	43695	43701	gtttTTTTTTGggga	7.67	-8.83		294	214	254
DMU31961	D	-294325	-294319	43909	43915	ctatTTTTATGacca	6.62	-8.14		214	168	191
DMU31961	R	-294157	-294151	44077	44083	ttttTTTTTTGgctt	7.67	-8.83		168	93	130.5
DMU31961	R	-294064	-294058	44170	44176	gtggTTTTATGttcg	6.62	-8.14		93	824	458.5
DMU31961	R	-293240	-293234	44994	45000	atttTTTTTTGtttt	7.67	-8.83		824	853	838.5
DMU31961	R	-292387	-292381	45847	45853	tgtaTTTTTTGggtt	7.67	-8.83		853	33	443
DMU31961	D	-292354	-292348	45880	45886	ttttTTTTATGgcaa	6.62	-8.14		33	295	164
DMU31961	R	-292059	-292053	46175	46181	cttcTTTTTTGgaag	7.67	-8.83		295	1151	723
DMU31961	D	-290908	-290902	47326	47332	ttttTTTTTTGcaga	7.67	-8.83		1151	483	817
DMU31961	D	-290425	-290419	47809	47815	aagtTTTTTTGgggt	7.67	-8.83		483	194	338.5
DMU31961	D	-290231	-290225	48003	48009	ggatTTTTATGcgat	6.62	-8.14		194	132	163
DMU31961	R	-290099	-290093	48135	48141	ggaaTTTTATGgcaa	6.62	-8.14		132	483	307.5
DMU31961	D	-289616	-289610	48618	48624	agcgTTTTTTGttcg	7.67	-8.83		483	845	664
DMU31961	R	-288771	-288765	49463	49469	tttgTTTTTTGattt	7.67	-8.83		845	7	426
DMU31961	R	-288764	-288758	49470	49476	tgtgTTTTTTGtttt	7.67	-8.83		7	113	60
DMU31961	D	-288651	-288645	49583	49589	caaaTTTTATGacca	6.62	-8.14		113	15	64
DMU31961	R	-288636	-288630	49598	49604	cgctTTTTATGttgc	6.62	-8.14		15	1573	794
DMU31961	D	-287063	-287057	51171	51177	tataTTTTTTGaaat	7.67	-8.83		1573	360	966.5
DMU31961	R	-286703	-286697	51531	51537	ttttTTTTTTGtgta	7.67	-8.83		360	4776	2568
DMU31961	D	-281927	-281921	56307	56313	gtaaTTTTATGgggc	6.62	-8.14		4776	221	2498.5
DMU31961	D	-281706	-281700	56528	56534	gagcTTTTATGttaa	6.62	-8.14		221	149	185
DMU31961	D	-281557	-281551	56677	56683	cttaTTTTTTGaaaa	7.67	-8.83		149	76	112.5
DMU31961	D	-281481	-281475	56753	56759	tactTTTTATGtagg	6.62	-8.14		76	424	250
DMU31961	R	-281057	-281051	57177	57183	atgcTTTTATGgctc	6.62	-8.14		424	199	311.5
DMU31961	R	-280858	-280852	57376	57382	tgcaTTTTATGgtac	6.62	-8.14		199	100	149.5
DMU31961	D	-280758	-280752	57476	57482	cgttTTTTATGttat	6.62	-8.14		100	412	256
DMU31961	R	-280346	-280340	57888	57894	tccaTTTTATGtcgt	6.62	-8.14		412	1884	1148
DMU31961	D	-278462	-278456	59772	59778	cgcgTTTTATGatcc	6.62	-8.14		1884	446	1165
DMU31961	D	-278016	-278010	60218	60224	attaTTTTTTGgaca	7.67	-8.83		446	1010	728
DMU31961	D	-277006	-277000	61228	61234	ctcgTTTTATGttga	6.62	-8.14		1010	91	550.5
DMU31961	R	-276915	-276909	61319	61325	atagTTTTTTGacaa	7.67	-8.83		91	527	309
DMU31961	D	-276388	-276382	61846	61852	gaaaTTTTTTGaccc	7.67	-8.83	IAB8	527	243	385
DMU31961	R	-276145	-276139	62089	62095	tgggTTTTATGtatt	6.62	-8.14	IAB8	243	374	308.5	346.75
DMU31961	R	-275771	-275765	62463	62469	tctcTTTTATGaaag	6.62	-8.14		374	2196	1285
DMU31961	R	-273575	-273569	64659	64665	aaatTTTTATGtagg	6.62	-8.14		2196	1896	2046
DMU31961	D	-271679	-271673	66555	66561	aaatTTTTTTGaatt	7.67	-8.83		1896	1616	1756
DMU31961	R	-270063	-270057	68171	68177	ggcaTTTTTTGctga	7.67	-8.83		1616	1121	1368.5
DMU31961	D	-268942	-268936	69292	69298	attgTTTTATGatgc	6.62	-8.14		1121	772	946.5
DMU31961	D	-268170	-268164	70064	70070	gtcaTTTTTTGtttg	7.67	-8.83		772	175	473.5
DMU31961	R	-267995	-267989	70239	70245	caagTTTTATGatgt	6.62	-8.14		175	490	332.5
DMU31961	D	-267505	-267499	70729	70735	cctgTTTTTTGgggg	7.67	-8.83		490	13	251.5
DMU31961	D	-267492	-267486	70742	70748	ggttTTTTTTGtggg	7.67	-8.83		13	153	83
DMU31961	D	-267339	-267333	70895	70901	agttTTTTATGaaaa	6.62	-8.14		153	187	170
DMU31961	D	-267152	-267146	71082	71088	gtttTTTTTTGggtc	7.67	-8.83		187	504	345.5
DMU31961	D	-266648	-266642	71586	71592	agagTTTTATGctcg	6.62	-8.14		504	101	302.5
DMU31961	D	-266547	-266541	71687	71693	caacTTTTATGctgc	6.62	-8.14		101	1565	833
DMU31961	D	-264982	-264976	73252	73258	ctgaTTTTATGccgc	6.62	-8.14		1565	340	952.5
DMU31961	D	-264642	-264636	73592	73598	gcgaTTTTATGggtt	6.62	-8.14		340	1453	896.5
DMU31961	R	-263189	-263183	75045	75051	ttttTTTTTTGgttc	7.67	-8.83		1453	20	736.5
DMU31961	R	-263169	-263163	75065	75071	ttttTTTTTTGgttc	7.67	-8.83		20	1002	511
DMU31961	R	-262167	-262161	76067	76073	cctgTTTTATGacta	6.62	-8.14		1002	392	697
DMU31961	R	-261775	-261769	76459	76465	aactTTTTATGcagt	6.62	-8.14		392	214	303
DMU31961	R	-261561	-261555	76673	76679	aaacTTTTTTGtggg	7.67	-8.83		214	8	111
DMU31961	D	-261553	-261547	76681	76687	aaagTTTTTTGccca	7.67	-8.83		8	363	185.5
DMU31961	R	-261190	-261184	77044	77050	ggacTTTTTTGtcca	7.67	-8.83		363	986	674.5
DMU31961	R	-260204	-260198	78030	78036	cactTTTTATGgcac	6.62	-8.14		986	1997	1491.5
DMU31961	D	-258207	-258201	80027	80033	caagTTTTATGtcgt	6.62	-8.14	IAB7a	1997	71	1034
DMU31961	D	-258136	-258130	80098	80104	cacaTTTTTTGccct	7.67	-8.83	IAB7a	71	264	167.5
DMU31961	R	-257872	-257866	80362	80368	acgaTTTTATGcatg	6.62	-8.14	IAB7a	264	246	255
DMU31961	R	-257626	-257620	80608	80614	tctaTTTTATGcttg	6.62	-8.14	IAB7a	246	972	609
DMU31961	R	-256654	-256648	81580	81586	ccgaTTTTATGatga	6.62	-8.14	IAB7a	972	2107	1539.5	721
DMU31961	R	-254547	-254541	83687	83693	cctgTTTTTTGggcc	7.67	-8.83		2107	82	1094.5
DMU31961	R	-254465	-254459	83769	83775	cattTTTTTTGtttt	7.67	-8.83		82	870	476
DMU31961	D	-253595	-253589	84639	84645	ttttTTTTTTGtttt	7.67	-8.83		870	8	439
DMU31961	D	-253587	-253581	84647	84653	ttgtTTTTTTGggct	7.67	-8.83		8	19	13.5
DMU31961	D	-253568	-253562	84666	84672	ttcaTTTTTTGaggg	7.67	-8.83		19	708	363.5
DMU31961	D	-252860	-252854	85374	85380	ggtaTTTTATGctta	6.62	-8.14		708	111	409.5
DMU31961	D	-252749	-252743	85485	85491	atttTTTTTTGcaaa	7.67	-8.83		111	90	100.5
DMU31961	D	-252659	-252653	85575	85581	taatTTTTATGggtt	6.62	-8.14		90	381	235.5
DMU31961	R	-252278	-252272	85956	85962	caaaTTTTATGcttt	6.62	-8.14		381	381	381
DMU31961	R	-251897	-251891	86337	86343	tcatTTTTATGactc	6.62	-8.14		381	29	205
DMU31961	D	-251868	-251862	86366	86372	tattTTTTATGacaa	6.62	-8.14		29	448	238.5
DMU31961	D	-251420	-251414	86814	86820	taaaTTTTATGttta	6.62	-8.14		448	782	615
DMU31961	D	-250638	-250632	87596	87602	ttttTTTTTTGatgg	7.67	-8.83		782	178	480
DMU31961	D	-250460	-250454	87774	87780	cccgTTTTTTGgttt	7.67	-8.83		178	38	108
DMU31961	D	-250422	-250416	87812	87818	gttcTTTTTTGacaa	7.67	-8.83		38	43	40.5
DMU31961	R	-250379	-250373	87855	87861	cgacTTTTTTGtttt	7.67	-8.83		43	1165	604
DMU31961	D	-249214	-249208	89020	89026	tccaTTTTTTGttgc	7.67	-8.83		1165	38	601.5
DMU31961	R	-249176	-249170	89058	89064	tatgTTTTTTGaaaa	7.67	-8.83		38	7	22.5
DMU31961	R	-249169	-249163	89065	89071	atttTTTTATGtttt	6.62	-8.14		7	86	46.5
DMU31961	R	-249083	-249077	89151	89157	tttcTTTTTTGttca	7.67	-8.83		86	53	69.5
DMU31961	R	-249030	-249024	89204	89210	ataaTTTTATGttga	6.62	-8.14		53	2111	1082
DMU31961	R	-246919	-246913	91315	91321	acacTTTTTTGgtca	7.67	-8.83	IAB6	2111	21	1066
DMU31961	D	-246898	-246892	91336	91342	ttttTTTTTTGgtaa	7.67	-8.83	IAB6	21	690	355.5
DMU31961	R	-246208	-246202	92026	92032	aataTTTTTTGtttt	7.67	-8.83	IAB6	690	29	359.5
DMU31961	D	-246179	-246173	92055	92061	tctcTTTTATGgaat	6.62	-8.14	IAB6	29	348	188.5
DMU31961	R	-245831	-245825	92403	92409	ttttTTTTTTGcttt	7.67	-8.83	IAB6	348	158	253
DMU31961	R	-245673	-245667	92561	92567	atgcTTTTATGctca	6.62	-8.14	IAB6	158	886	522	457.417
DMU31961	R	-244787	-244781	93447	93453	ggagTTTTATGcaaa	6.62	-8.14		886	859	872.5
DMU31961	D	-243928	-243922	94306	94312	acttTTTTTTGgaaa	7.67	-8.83		859	1600	1229.5
DMU31961	R	-242328	-242322	95906	95912	caatTTTTATGatat	6.62	-8.14		1600	1486	1543
DMU31961	R	-240842	-240836	97392	97398	gcaaTTTTTTGaaca	7.67	-8.83		1486	112	799
DMU31961	R	-240730	-240724	97504	97510	atggTTTTTTGtggg	7.67	-8.83		112	1670	891
DMU31961	D	-239060	-239054	99174	99180	tacaTTTTTTGtctt	7.67	-8.83		1670	64	867
DMU31961	D	-238996	-238990	99238	99244	gtcgTTTTTTGtggt	7.67	-8.83		64	418	241
DMU31961	D	-238578	-238572	99656	99662	gttaTTTTATGtgat	6.62	-8.14		418	1569	993.5
DMU31961	R	-237009	-237003	101225	101231	cttaTTTTATGttat	6.62	-8.14		1569	675	1122
DMU31961	R	-236334	-236328	101900	101906	tacgTTTTATGcaat	6.62	-8.14		675	1430	1052.5
DMU31961	R	-234904	-234898	103330	103336	ggaaTTTTTTGgggg	7.67	-8.83		1430	1306	1368
DMU31961	R	-233598	-233592	104636	104642	cttgTTTTATGgccc	6.62	-8.14	IAB5	1306	17	661.5
DMU31961	R	-233581	-233575	104653	104659	cgttTTTTATGcccg	6.62	-8.14	IAB5	17	300	158.5	410
DMU31961	D	-233281	-233275	104953	104959	ggaaTTTTATGtcac	6.62	-8.14		300	11	155.5
DMU31961	D	-233270	-233264	104964	104970	tcacTTTTATGgcct	6.62	-8.14		11	389	200
DMU31961	R	-232881	-232875	105353	105359	aataTTTTATGaaaa	6.62	-8.14		389	3207	1798
DMU31961	D	-229674	-229668	108560	108566	ctggTTTTTTGctct	7.67	-8.83		3207	943	2075
DMU31961	R	-228731	-228725	109503	109509	ggccTTTTTTGgggg	7.67	-8.83		943	153	548
DMU31961	R	-228578	-228572	109656	109662	tattTTTTTTGtttt	7.67	-8.83		153	671	412
DMU31961	D	-227907	-227901	110327	110333	atgcTTTTTTGaaaa	7.67	-8.83		671	1641	1156
DMU31961	R	-226266	-226260	111968	111974	acatTTTTATGggca	6.62	-8.14		1641	549	1095
DMU31961	R	-225717	-225711	112517	112523	tcacTTTTATGggaa	6.62	-8.14		549	92	320.5
DMU31961	D	-225625	-225619	112609	112615	gcgaTTTTATGaatg	6.62	-8.14		92	2587	1339.5
DMU31961	R	-223038	-223032	115196	115202	gaatTTTTATGaacg	6.62	-8.14		2587	328	1457.5
DMU31961	R	-222710	-222704	115524	115530	aaaaTTTTTTGatta	7.67	-8.83		328	55	191.5
DMU31961	D	-222655	-222649	115579	115585	aaagTTTTATGatta	6.62	-8.14		55	992	523.5
DMU31961	D	-221663	-221657	116571	116577	acagTTTTATGcctg	6.62	-8.14		992	1568	1280
DMU31961	D	-220095	-220089	118139	118145	ctctTTTTATGatcc	6.62	-8.14		1568	176	872
DMU31961	R	-219919	-219913	118315	118321	tattTTTTATGatat	6.62	-8.14		176	1853	1014.5
DMU31961	R	-218066	-218060	120168	120174	cgttTTTTTTGtaca	7.67	-8.83		1853	519	1186
DMU31961	R	-217547	-217541	120687	120693	ttttTTTTTTGcaaa	7.67	-8.83		519	1141	830
DMU31961	R	-216406	-216400	121828	121834	gactTTTTATGatgc	6.62	-8.14		1141	199	670
DMU31961	D	-216207	-216201	122027	122033	aacaTTTTATGattg	6.62	-8.14		199	783	491
DMU31961	D	-215424	-215418	122810	122816	gcctTTTTTTGatga	7.67	-8.83		783	358	570.5
DMU31961	R	-215066	-215060	123168	123174	atatTTTTATGgagc	6.62	-8.14		358	423	390.5
DMU31961	R	-214643	-214637	123591	123597	aggaTTTTATGgcct	6.62	-8.14		423	1231	827
DMU31961	D	-213412	-213406	124822	124828	tataTTTTATGccca	6.62	-8.14		1231	269	750
DMU31961	D	-213143	-213137	125091	125097	aagaTTTTATGgtcg	6.62	-8.14		269	794	531.5
DMU31961	R	-212349	-212343	125885	125891	ttttTTTTTTGtatc	7.67	-8.83		794	195	494.5
DMU31961	D	-212154	-212148	126080	126086	aaaaTTTTTTGgtat	7.67	-8.83		195	383	289
DMU31961	R	-211771	-211765	126463	126469	cattTTTTATGaatg	6.62	-8.14		383	256	319.5
DMU31961	R	-211515	-211509	126719	126725	tataTTTTATGaagt	6.62	-8.14		256	1810	1033
DMU31961	D	-209705	-209699	128529	128535	ccgtTTTTATGtaaa	6.62	-8.14		1810	1357	1583.5
DMU31961	R	-208348	-208342	129886	129892	ataaTTTTATGacta	6.62	-8.14		1357	1063	1210
DMU31961	D	-207285	-207279	130949	130955	tgcgTTTTATGcgtt	6.62	-8.14		1063	1617	1340
DMU31961	R	-205668	-205662	132566	132572	tttcTTTTTTGtctt	7.67	-8.83		1617	602	1109.5
DMU31961	D	-205066	-205060	133168	133174	tggcTTTTTTGcggt	7.67	-8.83		602	440	521
DMU31961	R	-204626	-204620	133608	133614	gagcTTTTTTGcagc	7.67	-8.83		440	283	361.5
DMU31961	D	-204343	-204337	133891	133897	aaatTTTTATGactt	6.62	-8.14		283	297	290
DMU31961	D	-204046	-204040	134188	134194	gattTTTTTTGttat	7.67	-8.83		297	422	359.5
DMU31961	R	-203624	-203618	134610	134616	cactTTTTATGgcat	6.62	-8.14		422	714	568
DMU31961	R	-202910	-202904	135324	135330	aataTTTTTTGtttt	7.67	-8.83		714	2109	1411.5
DMU31961	R	-200801	-200795	137433	137439	aaagTTTTATGcata	6.62	-8.14		2109	49	1079
DMU31961	D	-200752	-200746	137482	137488	tcgaTTTTATGattt	6.62	-8.14		49	1158	603.5
DMU31961	D	-199594	-199588	138640	138646	ataaTTTTATGactt	6.62	-8.14		1158	584	871
DMU31961	R	-199010	-199004	139224	139230	tttaTTTTTTGtgtt	7.67	-8.83		584	1550	1067
DMU31961	D	-197460	-197454	140774	140780	acgtTTTTATGgttt	6.62	-8.14		1550	242	896
DMU31961	R	-197218	-197212	141016	141022	tttgTTTTATGgcta	6.62	-8.14		242	556	399
DMU31961	D	-196662	-196656	141572	141578	cataTTTTATGgaaa	6.62	-8.14		556	353	454.5
DMU31961	R	-196309	-196303	141925	141931	ctatTTTTATGccag	6.62	-8.14		353	1348	850.5
DMU31961	R	-194961	-194955	143273	143279	tgcaTTTTTTGgcaa	7.67	-8.83		1348	439	893.5
DMU31961	D	-194522	-194516	143712	143718	ggcaTTTTATGaccc	6.62	-8.14		439	1359	899
DMU31961	D	-193163	-193157	145071	145077	atagTTTTATGgagt	6.62	-8.14		1359	273	816
DMU31961	R	-192890	-192884	145344	145350	tttcTTTTTTGactc	7.67	-8.83		273	728	500.5
DMU31961	D	-192162	-192156	146072	146078	cctgTTTTATGaaaa	6.62	-8.14		728	1672	1200
DMU31961	R	-190490	-190484	147744	147750	agtaTTTTTTGgaat	7.67	-8.83		1672	488	1080
DMU31961	D	-190002	-189996	148232	148238	ctatTTTTTTGgttc	7.67	-8.83		488	678	583
DMU31961	D	-189324	-189318	148910	148916	gattTTTTATGatat	6.62	-8.14		678	403	540.5
DMU31961	D	-188921	-188915	149313	149319	attcTTTTATGtgca	6.62	-8.14		403	35	219
DMU31961	R	-188886	-188880	149348	149354	ctatTTTTATGtaga	6.62	-8.14		35	860	447.5
DMU31961	D	-188026	-188020	150208	150214	ttgaTTTTATGgcga	6.62	-8.14		860	79	469.5
DMU31961	D	-187947	-187941	150287	150293	gtctTTTTATGggca	6.62	-8.14		79	509	294
DMU31961	R	-187438	-187432	150796	150802	agcaTTTTATGaata	6.62	-8.14		509	206	357.5
DMU31961	D	-187232	-187226	151002	151008	ctgcTTTTATGgttt	6.62	-8.14		206	730	468
DMU31961	R	-186502	-186496	151732	151738	ctatTTTTATGacat	6.62	-8.14		730	755	742.5
DMU31961	R	-185747	-185741	152487	152493	tacaTTTTTTGttgg	7.67	-8.83		755	261	508
DMU31961	R	-185486	-185480	152748	152754	acatTTTTATGaaaa	6.62	-8.14		261	145	203
DMU31961	D	-185341	-185335	152893	152899	ttttTTTTTTGaaac	7.67	-8.83		145	31	88
DMU31961	R	-185310	-185304	152924	152930	gactTTTTTTGtgga	7.67	-8.83		31	121	76
DMU31961	R	-185189	-185183	153045	153051	agtgTTTTATGcttt	6.62	-8.14		121	442	281.5
DMU31961	R	-184747	-184741	153487	153493	ttttTTTTTTGggga	7.67	-8.83		442	21	231.5
DMU31961	R	-184726	-184720	153508	153514	tataTTTTTTGtttt	7.67	-8.83		21	556	288.5
DMU31961	D	-184170	-184164	154064	154070	agtgTTTTATGacat	6.62	-8.14		556	118	337
DMU31961	R	-184052	-184046	154182	154188	gtatTTTTATGgcag	6.62	-8.14		118	626	372
DMU31961	D	-183426	-183420	154808	154814	ttctTTTTATGgttt	6.62	-8.14		626	38	332
DMU31961	D	-183388	-183382	154846	154852	tataTTTTTTGtttt	7.67	-8.83		38	1516	777
DMU31961	D	-181872	-181866	156362	156368	tgggTTTTATGtcca	6.62	-8.14		1516	229	872.5
DMU31961	R	-181643	-181637	156591	156597	ctttTTTTTTGtatt	7.67	-8.83		229	1154	691.5
DMU31961	D	-180489	-180483	157745	157751	aaaaTTTTTTGtgta	7.67	-8.83		1154	41	597.5
DMU31961	R	-180448	-180442	157786	157792	ttgaTTTTTTGattt	7.67	-8.83		41	546	293.5
DMU31961	R	-179902	-179896	158332	158338	agtgTTTTTTGggcg	7.67	-8.83		546	87	316.5
DMU31961	D	-179815	-179809	158419	158425	ctctTTTTATGcggc	6.62	-8.14		87	513	300
DMU31961	D	-179302	-179296	158932	158938	ttttTTTTTTGccag	7.67	-8.83		513	608	560.5
DMU31961	R	-178694	-178688	159540	159546	tgagTTTTTTGggtg	7.67	-8.83		608	2125	1366.5
DMU31961	D	-176569	-176563	161665	161671	gtctTTTTATGggcg	6.62	-8.14		2125	11	1068
DMU31961	D	-176558	-176552	161676	161682	ggcgTTTTATGatct	6.62	-8.14		11	85	48
DMU31961	D	-176473	-176467	161761	161767	cccgTTTTATGgtcc	6.62	-8.14		85	1244	664.5
DMU31961	R	-175229	-175223	163005	163011	acatTTTTATGttat	6.62	-8.14		1244	996	1120
DMU31961	D	-174233	-174227	164001	164007	ttatTTTTTTGtttt	7.67	-8.83		996	436	716
DMU31961	R	-173797	-173791	164437	164443	ttacTTTTTTGaaaa	7.67	-8.83		436	614	525
DMU31961	D	-173183	-173177	165051	165057	ttaaTTTTTTGtgag	7.67	-8.83		614	334	474
DMU31961	R	-172849	-172843	165385	165391	aaggTTTTTTGtcac	7.67	-8.83		334	844	589
DMU31961	R	-172005	-171999	166229	166235	ctccTTTTTTGtttc	7.67	-8.83		844	1202	1023
DMU31961	R	-170803	-170797	167431	167437	ggcaTTTTTTGcacg	7.67	-8.83		1202	458	830
DMU31961	R	-170345	-170339	167889	167895	tttgTTTTTTGagtc	7.67	-8.83		458	1184	821
DMU31961	R	-169161	-169155	169073	169079	tatgTTTTATGctga	6.62	-8.14		1184	816	1000
DMU31961	D	-168345	-168339	169889	169895	acatTTTTTTGtcgc	7.67	-8.83		816	178	497
DMU31961	D	-168167	-168161	170067	170073	ttgtTTTTATGattt	6.62	-8.14		178	9	93.5
DMU31961	D	-168158	-168152	170076	170082	tgatTTTTATGtcat	6.62	-8.14		9	1942	975.5
DMU31961	D	-166216	-166210	172018	172024	ggggTTTTTTGtatt	7.67	-8.83	IAB2	1942	107	1024.5
DMU31961	R	-166109	-166103	172125	172131	cattTTTTATGagac	6.62	-8.14	IAB2	107	160	133.5
DMU31961	R	-165949	-165943	172285	172291	aattTTTTATGgttt	6.62	-8.14	IAB2	160	63	111.5
DMU31961	R	-165886	-165880	172348	172354	cttcTTTTTTGcact	7.67	-8.83	IAB2	63	23	43
DMU31961	R	-165863	-165857	172371	172377	gccgTTTTATGgctt	6.62	-8.14	IAB2	23	139	81
DMU31961	R	-165724	-165718	172510	172516	cgaaTTTTTTGcgcg	7.67	-8.83	IAB2	139	46	92.5
DMU31961	R	-165678	-165672	172556	172562	ctagTTTTTTGtttc	7.67	-8.83	IAB2	46	1404	725	315.857
DMU31961	R	-164274	-164268	173960	173966	tatgTTTTTTGtaga	7.67	-8.83		1404	1041	1222.5
DMU31961	R	-163233	-163227	175001	175007	ttttTTTTTTGtagc	7.67	-8.83		1041	775	908
DMU31961	D	-162458	-162452	175776	175782	ataaTTTTATGcgat	6.62	-8.14		775	354	564.5
DMU31961	R	-162104	-162098	176130	176136	gcagTTTTATGtaca	6.62	-8.14		354	38	196
DMU31961	R	-162066	-162060	176168	176174	taggTTTTATGcatt	6.62	-8.14		38	1206	622
DMU31961	D	-160860	-160854	177374	177380	tataTTTTATGtcat	6.62	-8.14		1206	636	921
DMU31961	R	-160224	-160218	178010	178016	ggtgTTTTATGcgtt	6.62	-8.14		636	798	717
DMU31961	R	-159426	-159420	178808	178814	ttcaTTTTTTGcgtt	7.67	-8.83		798	837	817.5
DMU31961	D	-158589	-158583	179645	179651	tatgTTTTTTGgcct	7.67	-8.83		837	572	704.5
DMU31961	D	-158017	-158011	180217	180223	taatTTTTATGcgat	6.62	-8.14		572	689	630.5
DMU31961	R	-157328	-157322	180906	180912	ttcgTTTTATGaact	6.62	-8.14		689	890	789.5
DMU31961	D	-156438	-156432	181796	181802	atatTTTTATGtatc	6.62	-8.14		890	432	661
DMU31961	D	-156006	-156000	182228	182234	tataTTTTTTGttaa	7.67	-8.83		432	757	594.5
DMU31961	D	-155249	-155243	182985	182991	tcgtTTTTATGgacc	6.62	-8.14		757	279	518
DMU31961	D	-154970	-154964	183264	183270	tcatTTTTATGgagc	6.62	-8.14		279	793	536
DMU31961	D	-154177	-154171	184057	184063	tataTTTTATGcata	6.62	-8.14		793	1931	1362
DMU31961	R	-152246	-152240	185988	185994	attcTTTTTTGgtgg	7.67	-8.83		1931	1072	1501.5
DMU31961	R	-151174	-151168	187060	187066	tcatTTTTTTGacta	7.67	-8.83		1072	3096	2084
DMU31961	D	-148078	-148072	190156	190162	tcacTTTTTTGcact	7.67	-8.83		3096	70	1583
DMU31961	R	-148008	-148002	190226	190232	ctctTTTTATGccct	6.62	-8.14		70	2519	1294.5
DMU31961	D	-145489	-145483	192745	192751	ctatTTTTATGgtga	6.62	-8.14		2519	1327	1923
DMU31961	R	-144162	-144156	194072	194078	taggTTTTTTGgctt	7.67	-8.83		1327	881	1104
DMU31961	D	-143281	-143275	194953	194959	ttgaTTTTTTGgcgg	7.67	-8.83		881	1816	1348.5
DMU31961	R	-141465	-141459	196769	196775	ttttTTTTTTGcctt	7.67	-8.83		1816	12	914
DMU31961	R	-141453	-141447	196781	196787	cttaTTTTTTGtttt	7.67	-8.83		12	304	158
DMU31961	D	-141149	-141143	197085	197091	ttgcTTTTTTGtgga	7.67	-8.83		304	9556	4930
DMU31961	D	-131593	-131587	206641	206647	atttTTTTTTGcgtc	7.67	-8.83		9556	587	5071.5
DMU31961	D	-131006	-131000	207228	207234	cagcTTTTATGgcgt	6.62	-8.14		587	633	610
DMU31961	D	-130373	-130367	207861	207867	ctttTTTTTTGccaa	7.67	-8.83		633	1215	924
DMU31961	R	-129158	-129152	209076	209082	tgtgTTTTTTGcact	7.67	-8.83		1215	455	835
DMU31961	R	-128703	-128697	209531	209537	tttaTTTTATGtagt	6.62	-8.14		455	294	374.5
DMU31961	D	-128409	-128403	209825	209831	ataaTTTTTTGccat	7.67	-8.83		294	222	258
DMU31961	D	-128187	-128181	210047	210053	cattTTTTATGgcgc	6.62	-8.14		222	2159	1190.5
DMU31961	R	-126028	-126022	212206	212212	tggtTTTTATGtctt	6.62	-8.14		2159	183	1171
DMU31961	D	-125845	-125839	212389	212395	caggTTTTATGgctt	6.62	-8.14		183	425	304
DMU31961	R	-125420	-125414	212814	212820	gtctTTTTATGgcga	6.62	-8.14		425	946	685.5
DMU31961	R	-124474	-124468	213760	213766	ctttTTTTTTGtgtg	7.67	-8.83		946	1761	1353.5
DMU31961	R	-122713	-122707	215521	215527	tacaTTTTTTGggtc	7.67	-8.83		1761	1632	1696.5
DMU31961	R	-121081	-121075	217153	217159	gattTTTTTTGttgc	7.67	-8.83		1632	83	857.5
DMU31961	R	-120998	-120992	217236	217242	tgtaTTTTTTGgcca	7.67	-8.83		83	51	67
DMU31961	R	-120947	-120941	217287	217293	cactTTTTATGctgc	6.62	-8.14		51	550	300.5
DMU31961	R	-120397	-120391	217837	217843	agcaTTTTTTGacgt	7.67	-8.83		550	71	310.5
DMU31961	R	-120326	-120320	217908	217914	ttatTTTTATGaaat	6.62	-8.14		71	99	85
DMU31961	R	-120227	-120221	218007	218013	tattTTTTTTGggac	7.67	-8.83		99	14	56.5
DMU31961	R	-120213	-120207	218021	218027	gtctTTTTTTGgggt	7.67	-8.83		14	199	106.5
DMU31961	D	-120014	-120008	218220	218226	tcggTTTTATGctgc	6.62	-8.14		199	544	371.5
DMU31961	D	-119470	-119464	218764	218770	gtttTTTTATGagtg	6.62	-8.14		544	299	421.5
DMU31961	R	-119171	-119165	219063	219069	ggggTTTTATGgctc	6.62	-8.14		299	586	442.5
DMU31961	R	-118585	-118579	219649	219655	cacaTTTTATGtccc	6.62	-8.14		586	66	326
DMU31961	R	-118519	-118513	219715	219721	ttatTTTTATGcgcc	6.62	-8.14		66	281	173.5
DMU31961	D	-118238	-118232	219996	220002	ttcgTTTTATGgttt	6.62	-8.14		281	9	145
DMU31961	D	-118229	-118223	220005	220011	tggtTTTTATGgttt	6.62	-8.14		9	9	9
DMU31961	D	-118220	-118214	220014	220020	tggtTTTTATGcggg	6.62	-8.14		9	12	10.5
DMU31961	D	-118208	-118202	220026	220032	gggtTTTTATGactt	6.62	-8.14		12	9	10.5
DMU31961	D	-118199	-118193	220035	220041	tgacTTTTATGgggt	6.62	-8.14		9	1445	727
DMU31961	D	-116754	-116748	221480	221486	ttttTTTTTTGgctt	7.67	-8.83		1445	32	738.5
DMU31961	D	-116722	-116716	221512	221518	tttcTTTTTTGttgc	7.67	-8.83		32	45	38.5
DMU31961	D	-116677	-116671	221557	221563	acgtTTTTTTGcaca	7.67	-8.83		45	1077	561
DMU31961	R	-115600	-115594	222634	222640	ttaaTTTTATGatct	6.62	-8.14		1077	253	665
DMU31961	D	-115347	-115341	222887	222893	tggcTTTTATGgctg	6.62	-8.14		253	998	625.5
DMU31961	R	-114349	-114343	223885	223891	tggtTTTTTTGccgt	7.67	-8.83		998	1004	1001
DMU31961	D	-113345	-113339	224889	224895	agtgTTTTATGgccg	6.62	-8.14		1004	2672	1838
DMU31961	D	-110673	-110667	227561	227567	cacaTTTTATGaagt	6.62	-8.14		2672	823	1747.5
DMU31961	R	-109850	-109844	228384	228390	atttTTTTTTGgctt	7.67	-8.83		823	357	590
DMU31961	R	-109493	-109487	228741	228747	taatTTTTTTGtgtt	7.67	-8.83		357	1156	756.5
DMU31961	D	-108337	-108331	229897	229903	tttaTTTTATGtttc	6.62	-8.14		1156	713	934.5
DMU31961	R	-107624	-107618	230610	230616	gtagTTTTTTGtttt	7.67	-8.83		713	1247	980
DMU31961	R	-106377	-106371	231857	231863	taccTTTTTTGtagt	7.67	-8.83		1247	60	653.5
DMU31961	R	-106317	-106311	231917	231923	acatTTTTATGattt	6.62	-8.14		60	13	36.5
DMU31961	R	-106304	-106298	231930	231936	tattTTTTATGacac	6.62	-8.14		13	208	110.5
DMU31961	R	-106096	-106090	232138	232144	atatTTTTATGattt	6.62	-8.14		208	836	522
DMU31961	R	-105260	-105254	232974	232980	ttgcTTTTTTGttga	7.67	-8.83		836	179	507.5
DMU31961	R	-105081	-105075	233153	233159	aaatTTTTTTGattt	7.67	-8.83		179	263	221
DMU31961	R	-104818	-104812	233416	233422	cggcTTTTATGgcct	6.62	-8.14		263	245	254
DMU31961	D	-104573	-104567	233661	233667	tgggTTTTATGtctc	6.62	-8.14		245	274	259.5
DMU31961	R	-104299	-104293	233935	233941	gaagTTTTATGttct	6.62	-8.14		274	1226	750
DMU31961	R	-103073	-103067	235161	235167	tattTTTTTTGtaat	7.67	-8.83		1226	224	725
DMU31961	D	-102849	-102843	235385	235391	taatTTTTATGactg	6.62	-8.14		224	1165	694.5
DMU31961	R	-101684	-101678	236550	236556	cgccTTTTATGgtct	6.62	-8.14		1165	74	619.5
DMU31961	R	-101610	-101604	236624	236630	ccatTTTTATGccca	6.62	-8.14		74	1750	912
DMU31961	D	-99860	-99854	238374	238380	gtcaTTTTTTGccat	7.67	-8.83		1750	201	975.5
DMU31961	D	-99659	-99653	238575	238581	ctagTTTTATGgcca	6.62	-8.14		201	264	232.5
DMU31961	R	-99395	-99389	238839	238845	cgtgTTTTTTGggcg	7.67	-8.83		264	272	268
DMU31961	D	-99123	-99117	239111	239117	ttttTTTTTTGtgga	7.67	-8.83		272	2135	1203.5
DMU31961	D	-96988	-96982	241246	241252	atccTTTTATGcgcc	6.62	-8.14		2135	939	1537
DMU31961	D	-96049	-96043	242185	242191	atctTTTTATGccat	6.62	-8.14		939	180	559.5
DMU31961	D	-95869	-95863	242365	242371	aaacTTTTTTGcact	7.67	-8.83		180	754	467
DMU31961	R	-95115	-95109	243119	243125	ttatTTTTATGgttt	6.62	-8.14		754	745	749.5
DMU31961	D	-94370	-94364	243864	243870	cggcTTTTATGgcca	6.62	-8.14		745	1020	882.5
DMU31961	D	-93350	-93344	244884	244890	acctTTTTATGgcag	6.62	-8.14		1020	108	564
DMU31961	R	-93242	-93236	244992	244998	actgTTTTTTGgctt	7.67	-8.83		108	298	203
DMU31961	D	-92944	-92938	245290	245296	gagaTTTTATGgctg	6.62	-8.14		298	729	513.5
DMU31961	R	-92215	-92209	246019	246025	ataaTTTTTTGagtc	7.67	-8.83		729	29	379
DMU31961	D	-92186	-92180	246048	246054	aataTTTTTTGtctg	7.67	-8.83		29	1325	677
DMU31961	D	-90861	-90855	247373	247379	gtgaTTTTATGaaga	6.62	-8.14		1325	89	707
DMU31961	D	-90772	-90766	247462	247468	acttTTTTTTGtccc	7.67	-8.83		89	879	484
DMU31961	R	-89893	-89887	248341	248347	caatTTTTTTGaatt	7.67	-8.83		879	1635	1257
DMU31961	R	-88258	-88252	249976	249982	ctaaTTTTTTGctac	7.67	-8.83		1635	713	1174
DMU31961	R	-87545	-87539	250689	250695	tgatTTTTATGactc	6.62	-8.14		713	1925	1319
DMU31961	D	-85620	-85614	252614	252620	atatTTTTTTGgttt	7.67	-8.83		1925	528	1226.5
DMU31961	D	-85092	-85086	253142	253148	agttTTTTTTGgttt	7.67	-8.83		528	9	268.5
DMU31961	D	-85083	-85077	253151	253157	tggtTTTTTTGcggg	7.67	-8.83		9	1167	588
DMU31961	D	-83916	-83910	254318	254324	ttttTTTTTTGgtct	7.67	-8.83		1167	521	844
DMU31961	R	-83395	-83389	254839	254845	ggttTTTTATGgatt	6.62	-8.14		521	83	302
DMU31961	R	-83312	-83306	254922	254928	agggTTTTTTGttga	7.67	-8.83		83	44	63.5
DMU31961	R	-83268	-83262	254966	254972	gccaTTTTTTGtcat	7.67	-8.83		44	14	29
DMU31961	R	-83254	-83248	254980	254986	acaaTTTTTTGttgg	7.67	-8.83		14	236	125
DMU31961	R	-83018	-83012	255216	255222	ttttTTTTTTGttgg	7.67	-8.83		236	345	290.5
DMU31961	R	-82673	-82667	255561	255567	gccaTTTTATGaact	6.62	-8.14		345	2398	1371.5
DMU31961	R	-80275	-80269	257959	257965	taatTTTTATGgaca	6.62	-8.14		2398	753	1575.5
DMU31961	D	-79522	-79516	258712	258718	cgatTTTTTTGttct	7.67	-8.83		753	1308	1030.5
DMU31961	R	-78214	-78208	260020	260026	acatTTTTTTGtgca	7.67	-8.83		1308	1755	1531.5
DMU31961	R	-76459	-76453	261775	261781	aattTTTTTTGattt	7.67	-8.83		1755	111	933
DMU31961	D	-76348	-76342	261886	261892	ccaaTTTTTTGcatt	7.67	-8.83		111	9	60
DMU31961	D	-76339	-76333	261895	261901	tgcaTTTTTTGaact	7.67	-8.83		9	566	287.5
DMU31961	R	-75773	-75767	262461	262467	atatTTTTTTGtcgc	7.67	-8.83		566	1677	1121.5
DMU31961	R	-74096	-74090	264138	264144	ttaaTTTTTTGattt	7.67	-8.83		1677	590	1133.5
DMU31961	R	-73506	-73500	264728	264734	ctaaTTTTTTGttgc	7.67	-8.83		590	931	760.5
DMU31961	D	-72575	-72569	265659	265665	ttcaTTTTATGactc	6.62	-8.14		931	1097	1014
DMU31961	D	-71478	-71472	266756	266762	tataTTTTTTGtaaa	7.67	-8.83		1097	49	573
DMU31961	D	-71429	-71423	266805	266811	gattTTTTTTGtgaa	7.67	-8.83		49	77	63
DMU31961	D	-71352	-71346	266882	266888	tttcTTTTTTGtgga	7.67	-8.83		77	206	141.5
DMU31961	D	-71146	-71140	267088	267094	ttgaTTTTTTGcgtt	7.67	-8.83		206	952	579
DMU31961	R	-70194	-70188	268040	268046	gtttTTTTATGgaca	6.62	-8.14		952	279	615.5
DMU31961	D	-69915	-69909	268319	268325	cttaTTTTTTGtcat	7.67	-8.83		279	31	155
DMU31961	D	-69884	-69878	268350	268356	gctgTTTTTTGaggg	7.67	-8.83		31	2704	1367.5
DMU31961	R	-67180	-67174	271054	271060	ctttTTTTTTGgttg	7.67	-8.83		2704	170	1437
DMU31961	R	-67010	-67004	271224	271230	ttatTTTTTTGcctg	7.67	-8.83		170	1465	817.5
DMU31961	R	-65545	-65539	272689	272695	ttggTTTTTTGggct	7.67	-8.83		1465	188	826.5
DMU31961	D	-65357	-65351	272877	272883	ttttTTTTTTGagta	7.67	-8.83		188	550	369
DMU31961	D	-64807	-64801	273427	273433	ttttTTTTTTGctaa	7.67	-8.83		550	433	491.5
DMU31961	D	-64374	-64368	273860	273866	tactTTTTATGtgta	6.62	-8.14		433	974	703.5
DMU31961	R	-63400	-63394	274834	274840	cgccTTTTTTGagag	7.67	-8.83		974	253	613.5
DMU31961	D	-63147	-63141	275087	275093	tgctTTTTTTGtttt	7.67	-8.83		253	548	400.5
DMU31961	R	-62599	-62593	275635	275641	tcctTTTTTTGattc	7.67	-8.83		548	333	440.5
DMU31961	D	-62266	-62260	275968	275974	cgttTTTTATGtgtg	6.62	-8.14		333	168	250.5
DMU31961	R	-62098	-62092	276136	276142	tactTTTTATGacct	6.62	-8.14		168	226	197
DMU31961	D	-61872	-61866	276362	276368	agttTTTTATGggcc	6.62	-8.14		226	553	389.5
DMU31961	R	-61319	-61313	276915	276921	ttttTTTTTTGcttg	7.67	-8.83		553	465	509
DMU31961	R	-60854	-60848	277380	277386	ctttTTTTTTGcata	7.67	-8.83		465	1662	1063.5
DMU31961	R	-59192	-59186	279042	279048	tcaaTTTTTTGtggt	7.67	-8.83		1662	419	1040.5
DMU31961	D	-58773	-58767	279461	279467	tcttTTTTTTGcagt	7.67	-8.83		419	876	647.5
DMU31961	R	-57897	-57891	280337	280343	gcaaTTTTATGcgca	6.62	-8.14		876	222	549
DMU31961	D	-57675	-57669	280559	280565	aataTTTTTTGcaca	7.67	-8.83		222	450	336
DMU31961	R	-57225	-57219	281009	281015	agttTTTTATGgcct	6.62	-8.14		450	250	350
DMU31961	R	-56975	-56969	281259	281265	gaatTTTTATGtcct	6.62	-8.14		250	2055	1152.5
DMU31961	R	-54920	-54914	283314	283320	cgtgTTTTTTGctgc	7.67	-8.83		2055	4021	3038
DMU31961	D	-50899	-50893	287335	287341	tcttTTTTTTGcctg	7.67	-8.83		4021	493	2257
DMU31961	D	-50406	-50400	287828	287834	ccaaTTTTATGatgg	6.62	-8.14		493	145	319
DMU31961	D	-50261	-50255	287973	287979	ggggTTTTTTGggtg	7.67	-8.83		145	1112	628.5
DMU31961	D	-49149	-49143	289085	289091	tcgtTTTTTTGtgta	7.67	-8.83		1112	359	735.5
DMU31961	R	-48790	-48784	289444	289450	ttttTTTTTTGtatt	7.67	-8.83		359	344	351.5
DMU31961	D	-48446	-48440	289788	289794	aacaTTTTTTGctcg	7.67	-8.83		344	259	301.5
DMU31961	R	-48187	-48181	290047	290053	tactTTTTTTGttac	7.67	-8.83		259	61	160
DMU31961	D	-48126	-48120	290108	290114	tgccTTTTATGgctt	6.62	-8.14		61	559	310
DMU31961	D	-47567	-47561	290667	290673	ttttTTTTTTGgagc	7.67	-8.83		559	263	411
DMU31961	D	-47304	-47298	290930	290936	ctttTTTTTTGggag	7.67	-8.83		263	266	264.5
DMU31961	R	-47038	-47032	291196	291202	atttTTTTATGtaca	6.62	-8.14		266	12	139
DMU31961	R	-47026	-47020	291208	291214	ttttTTTTTTGcatt	7.67	-8.83		12	42	27
DMU31961	R	-46984	-46978	291250	291256	gttcTTTTTTGctgg	7.67	-8.83		42	489	265.5
DMU31961	D	-46495	-46489	291739	291745	ttttTTTTTTGtttt	7.67	-8.83		489	139	314
DMU31961	D	-46356	-46350	291878	291884	tcgaTTTTTTGgcaa	7.67	-8.83		139	173	156
DMU31961	R	-46183	-46177	292051	292057	ttttTTTTTTGccaa	7.67	-8.83		173	30	101.5
DMU31961	R	-46153	-46147	292081	292087	gctgTTTTATGaccg	6.62	-8.14		30	271	150.5
DMU31961	R	-45882	-45876	292352	292358	gaatTTTTATGtccc	6.62	-8.14		271	831	551
DMU31961	D	-45051	-45045	293183	293189	ttttTTTTTTGccag	7.67	-8.83		831	31	431
DMU31961	D	-45020	-45014	293214	293220	ctcaTTTTTTGcaat	7.67	-8.83		31	656	343.5
DMU31961	D	-44364	-44358	293870	293876	atacTTTTATGatga	6.62	-8.14		656	1509	1082.5
DMU31961	D	-42855	-42849	295379	295385	cgtgTTTTATGtctg	6.62	-8.14		1509	545	1027
DMU31961	D	-42310	-42304	295924	295930	catgTTTTATGtcgc	6.62	-8.14		545	115	330
DMU31961	R	-42195	-42189	296039	296045	atgcTTTTTTGcaca	7.67	-8.83		115	216	165.5
DMU31961	D	-41979	-41973	296255	296261	caaaTTTTTTGgcaa	7.67	-8.83		216	105	160.5
DMU31961	R	-41874	-41868	296360	296366	aaagTTTTTTGcgga	7.67	-8.83		105	695	400
DMU31961	R	-41179	-41173	297055	297061	cgcaTTTTATGtggt	6.62	-8.14		695	1523	1109
DMU31961	D	-39656	-39650	298578	298584	caatTTTTATGctta	6.62	-8.14		1523	1191	1357
DMU31961	R	-38465	-38459	299769	299775	gttaTTTTATGattg	6.62	-8.14		1191	1461	1326
DMU31961	R	-37004	-36998	301230	301236	caccTTTTATGcgcc	6.62	-8.14		1461	660	1060.5
DMU31961	R	-36344	-36338	301890	301896	tataTTTTTTGgcat	7.67	-8.83		660	156	408
DMU31961	R	-36188	-36182	302046	302052	tgtgTTTTATGaaaa	6.62	-8.14		156	150	153
DMU31961	D	-36038	-36032	302196	302202	tataTTTTTTGcgag	7.67	-8.83		150	836	493
DMU31961	D	-35202	-35196	303032	303038	atttTTTTATGagcc	6.62	-8.14		836	342	589
DMU31961	R	-34860	-34854	303374	303380	gtgcTTTTTTGggcg	7.67	-8.83		342	395	368.5
DMU31961	R	-34465	-34459	303769	303775	atatTTTTTTGtccg	7.67	-8.83		395	382	388.5
DMU31961	D	-34083	-34077	304151	304157	gcagTTTTATGcgcc	6.62	-8.14		382	1610	996
DMU31961	D	-32473	-32467	305761	305767	tataTTTTATGcgat	6.62	-8.14		1610	762	1186
DMU31961	D	-31711	-31705	306523	306529	ttttTTTTTTGaaaa	7.67	-8.83		762	406	584
DMU31961	D	-31305	-31299	306929	306935	cctaTTTTTTGgtag	7.67	-8.83		406	187	296.5
DMU31961	R	-31118	-31112	307116	307122	tctgTTTTTTGttgt	7.67	-8.83		187	1236	711.5
DMU31961	D	-29882	-29876	308352	308358	cgcaTTTTTTGtcgc	7.67	-8.83		1236	264	750
DMU31961	D	-29618	-29612	308616	308622	tattTTTTATGcaaa	6.62	-8.14		264	513	388.5
DMU31961	R	-29105	-29099	309129	309135	taacTTTTTTGccaa	7.67	-8.83		513	1057	785
DMU31961	D	-28048	-28042	310186	310192	gacaTTTTTTGaaaa	7.67	-8.83		1057	1246	1151.5
DMU31961	D	-26802	-26796	311432	311438	ttacTTTTATGcgcc	6.62	-8.14		1246	386	816
DMU31961	R	-26416	-26410	311818	311824	tttaTTTTATGcccc	6.62	-8.14		386	236	311
DMU31961	R	-26180	-26174	312054	312060	ttttTTTTTTGggtg	7.67	-8.83		236	869	552.5
DMU31961	D	-25311	-25305	312923	312929	cctcTTTTTTGgagg	7.67	-8.83		869	2655	1762
DMU31961	R	-22656	-22650	315578	315584	ttgcTTTTTTGgggc	7.67	-8.83		2655	576	1615.5
DMU31961	D	-22080	-22074	316154	316160	ttttTTTTTTGtggg	7.67	-8.83		576	1531	1053.5
DMU31961	D	-20549	-20543	317685	317691	tgtaTTTTTTGcgct	7.67	-8.83		1531	1303	1417
DMU31961	R	-19246	-19240	318988	318994	ttcaTTTTTTGtttt	7.67	-8.83		1303	522	912.5
DMU31961	R	-18724	-18718	319510	319516	ttttTTTTTTGtttt	7.67	-8.83		522	1562	1042
DMU31961	R	-17162	-17156	321072	321078	taaaTTTTTTGacgc	7.67	-8.83		1562	16	789
DMU31961	R	-17146	-17140	321088	321094	caatTTTTTTGgaaa	7.67	-8.83		16	36	26
DMU31961	D	-17110	-17104	321124	321130	atttTTTTTTGgtgt	7.67	-8.83		36	73	54.5
DMU31961	D	-17037	-17031	321197	321203	gactTTTTATGtaaa	6.62	-8.14		73	2503	1288
DMU31961	R	-14534	-14528	323700	323706	actgTTTTATGggcg	6.62	-8.14		2503	6048	4275.5
DMU31961	D	-8486	-8480	329748	329754	gcgaTTTTTTGaagg	7.67	-8.83		6048	1199	3623.5
DMU31961	R	-7287	-7281	330947	330953	cttcTTTTTTGgcgg	7.67	-8.83		1199	419	809
DMU31961	R	-6868	-6862	331366	331372	cattTTTTTTGaatt	7.67	-8.83		419	210	314.5
DMU31961	R	-6658	-6652	331576	331582	acgtTTTTTTGtctt	7.67	-8.83		210	2185	1197.5
DMU31961	R	-4473	-4467	333761	333767	aataTTTTATGatag	6.62	-8.14		2185	356	1270.5
DMU31961	R	-4117	-4111	334117	334123	atatTTTTTTGtagc	7.67	-8.83		356	3378	1867
DMU31961	R	-739	-733	337495	337501	gtccTTTTTTGcact	7.67	-8.83		3378		3378
													Ratio
											Average	699.884
											Enhancers	541.769	1.29185
											BX-C	711.407	0.983803
											IAB8	346.75	2.01841
											IAB7b	NA	NA
											IAB7a	721	0.970713
											IAB6	457.417	1.53008
											IAB5	410	1.70703
											IAB2	315.857	2.21583
