# Supplementary material for: Transcription Factor Binding Site Redundancy in Embryonic Enhancers of the Drosophila Bithorax Complex
Source: G3 (Bethesda). 2011 Dec 1;1(7):603–6. doi: 10.1534/g3.111.001404 (PMC3276168; doi:10.1534/g3.111.001404)
Supplement: Supporting Information [file supp_1.7.603_TableS5.xls]

## Sheet: Sheet1
Drewell Supplementary table 5
map	strand	Patser start	Patser end	start	end	sequence	score	ln(P)	Anno	Dis R	Dis L	Avg dis	Avg dis En
DMU31961	R	-337822	-337815	412	419	ttttTTCAATTAgttt	5.29	-8.49			282	282
DMU31961	D	-337540	-337533	694	701	taatGATAATTAcctc	4.77	-7.31		282	2	142
DMU31961	R	-337538	-337531	696	703	gtgaGGTAATTAtcat	5.27	-8.35		2	161	81.5
DMU31961	D	-337377	-337370	857	864	taatTTCAATTAtgtc	5.29	-8.49		161	1493	827
DMU31961	R	-335884	-335877	2350	2357	ttgaGTTAATGAaatc	4.97	-7.67		1493	100	796.5
DMU31961	R	-335784	-335777	2450	2457	tcgcGCCAATTGattt	5.05	-7.9		100	39	69.5
DMU31961	D	-335745	-335738	2489	2496	cgatGCCAATTAgtga	5.42	-8.94		39	182	110.5
DMU31961	D	-335563	-335556	2671	2678	atttGTTAATTGaaaa	5.2	-8.23		182	2	92
DMU31961	R	-335561	-335554	2673	2680	acttTTCAATTAacaa	5.29	-8.49		2	2164	1083
DMU31961	D	-333397	-333390	4837	4844	taaaGCCAATTActac	5.42	-8.94		2164	328	1246
DMU31961	D	-333069	-333062	5165	5172	aaaaTTTAATTGtagg	4.49	-6.79		328	2	165
DMU31961	R	-333067	-333060	5167	5174	taccTACAATTAaatt	4.48	-6.74		2	61	31.5
DMU31961	R	-333006	-332999	5228	5235	ataaGACAATTAtaat	5.19	-8.14		61	16	38.5
DMU31961	D	-332990	-332983	5244	5251	cagtCTCAATTGgttc	4.7	-7.14		16	20	18
DMU31961	D	-332970	-332963	5264	5271	ccatTCCAATTAggca	4.71	-7.18		20	423	221.5
DMU31961	D	-332547	-332540	5687	5694	ttcaCTTAATTAtcac	4.64	-7		423	2	212.5
DMU31961	R	-332545	-332538	5689	5696	cagtGATAATTAagtg	4.77	-7.31		2	590	296
DMU31961	R	-331955	-331948	6279	6286	tgtgGCCCATTAtttc	4.5	-6.83		590	192	391
DMU31961	D	-331763	-331756	6471	6478	agcaATCAATTAataa	4.39	-6.62		192	375	283.5
DMU31961	D	-331388	-331381	6846	6853	aactTCCAATTGagcc	4.34	-6.53		375	2	188.5
DMU31961	R	-331386	-331379	6848	6855	gcggCTCAATTGgaag	4.7	-7.14		2	120	61
DMU31961	R	-331266	-331259	6968	6975	ctctGGTAATGAggga	4.66	-7.08		120	370	245
DMU31961	R	-330896	-330889	7338	7345	ttttGTCAATGAggtc	5.4	-8.8		370	516	443
DMU31961	D	-330380	-330373	7854	7861	gtttTGCAATTAtttt	4.98	-7.73		516	125	320.5
DMU31961	R	-330255	-330248	7979	7986	ccagGTCCATTAtcca	5.08	-8.03		125	694	409.5
DMU31961	D	-329561	-329554	8673	8680	aaatGTTAATGGcgac	4.6	-6.94		694	78	386
DMU31961	D	-329483	-329476	8751	8758	tcgcGGCAATGGccat	4.71	-7.22		78	2	40
DMU31961	R	-329481	-329474	8753	8760	agatGGCCATTGccgc	4.4	-6.68		2	1635	818.5
DMU31961	R	-327846	-327839	10388	10395	gaccCTCAATGAaatc	4.46	-6.71		1635	1001	1318
DMU31961	R	-326845	-326838	11389	11396	gtctGTCAATTAcact	6	-10.44		1001	69	535
DMU31961	R	-326776	-326769	11458	11465	tgcaGTCAATGGgtct	5.02	-7.87		69	81	75
DMU31961	D	-326695	-326688	11539	11546	cattATCAATTAttgc	4.39	-6.62		81	15	48
DMU31961	R	-326680	-326673	11554	11561	aattGGCAATAAggtg	4.42	-6.69		15	5	10
DMU31961	D	-326675	-326668	11559	11566	tattGCCAATTAtaat	5.42	-8.94		5	330	167.5
DMU31961	R	-326345	-326338	11889	11896	tgttTGTAATTActta	4.55	-6.87		330	740	535
DMU31961	R	-325605	-325598	12629	12636	tctaCTCAATTAtagc	5.07	-7.94		740	509	624.5
DMU31961	R	-325096	-325089	13138	13145	gaatGGCAATGGttga	4.71	-7.22		509	806	657.5
DMU31961	R	-324290	-324283	13944	13951	tcaaGTCAATAAggga	4.73	-7.23		806	70	438
DMU31961	D	-324220	-324213	14014	14021	ttacTTTAATTGagac	4.49	-6.79		70	2	36
DMU31961	R	-324218	-324211	14016	14023	tggtCTCAATTAaagt	5.07	-7.94		2	300	151
DMU31961	D	-323918	-323911	14316	14323	tttgTTTAATTGcttt	4.49	-6.79		300	683	491.5
DMU31961	R	-323235	-323228	14999	15006	cgccGGCAATTGtgaa	5.32	-8.72		683	268	475.5
DMU31961	R	-322967	-322960	15267	15274	tgctGGCAATAAattt	4.42	-6.69		268	285	276.5
DMU31961	D	-322682	-322675	15552	15559	ccaaGCCCATTAagtg	4.5	-6.83		285	555	420
DMU31961	R	-322127	-322120	16107	16114	cgccTTCAATTAcaaa	5.29	-8.49		555	419	487
DMU31961	D	-321708	-321701	16526	16533	cactGGCAATTAaatt	5.69	-9.93		419	2	210.5
DMU31961	R	-321706	-321699	16528	16535	gcaaTTTAATTGccag	4.49	-6.79		2	458	230
DMU31961	D	-321248	-321241	16986	16993	atgtCTCAATTAgctt	5.07	-7.94		458	2	230
DMU31961	R	-321246	-321239	16988	16995	ccaaGCTAATTGagac	4.62	-6.98		2	15	8.5
DMU31961	D	-321231	-321224	17003	17010	gatcGTCAATAAtatt	4.73	-7.23		15	217	116
DMU31961	D	-321014	-321007	17220	17227	tataGCCAATTAaaca	5.42	-8.94		217	2	109.5
DMU31961	R	-321012	-321005	17222	17229	tttgTTTAATTGgcta	4.49	-6.79		2	835	418.5
DMU31961	D	-320177	-320170	18057	18064	gcgcTTCAATTGaagc	4.92	-7.6		835	2	418.5
DMU31961	R	-320175	-320168	18059	18066	atgcTTCAATTGaagc	4.92	-7.6		2	1033	517.5
DMU31961	D	-319142	-319135	19092	19099	tgttTTCAATGAttct	4.68	-7.11		1033	782	907.5
DMU31961	R	-318360	-318353	19874	19881	cgacGACAATGAcgac	4.59	-6.92		782	136	459
DMU31961	D	-318224	-318217	20010	20017	tgccCGCAATTAatac	4.76	-7.28		136	876	506
DMU31961	D	-317348	-317341	20886	20893	tttaGCTAATTGcagt	4.62	-6.98		876	2	439
DMU31961	R	-317346	-317339	20888	20895	aaacTGCAATTAgcta	4.98	-7.73		2	15	8.5
DMU31961	R	-317331	-317324	20903	20910	gtcgGCCAATTGggca	5.05	-7.9		15	63	39
DMU31961	D	-317268	-317261	20966	20973	taatGGCAATAAaaca	4.42	-6.69		63	284	173.5
DMU31961	D	-316984	-316977	21250	21257	aattTTTAATTGtccc	4.49	-6.79		284	2	143
DMU31961	R	-316982	-316975	21252	21259	ccggGACAATTAaaaa	5.19	-8.14		2	186	94
DMU31961	D	-316796	-316789	21438	21445	tataGTCCATTAcaca	5.08	-8.03		186	812	499
DMU31961	D	-315984	-315977	22250	22257	tattTACAATTAtatt	4.48	-6.74		812	276	544
DMU31961	D	-315708	-315701	22526	22533	gtgcTTTAATTGtggt	4.49	-6.79		276	48	162
DMU31961	D	-315660	-315653	22574	22581	aaaaGCCAATTGtggg	5.05	-7.9		48	40	44
DMU31961	R	-315620	-315613	22614	22621	aaaaGTCATTTAacct	4.53	-6.85		40	674	357
DMU31961	D	-314946	-314939	23288	23295	ccctCGCAATTAccaa	4.76	-7.28		674	2	338
DMU31961	R	-314944	-314937	23290	23297	ctttGGTAATTGcgag	4.89	-7.57		2	351	176.5
DMU31961	R	-314593	-314586	23641	23648	tcttGGTCATTAttca	4.35	-6.54		351	318	334.5
DMU31961	D	-314275	-314268	23959	23966	ataaCGTAATTAgtca	4.33	-6.51		318	164	241
DMU31961	D	-314111	-314104	24123	24130	taaaGCTAATTActca	5	-7.8		164	263	213.5
DMU31961	R	-313848	-313841	24386	24393	gatcGGTAATGAagtc	4.66	-7.08		263	90	176.5
DMU31961	D	-313758	-313751	24476	24483	tctcCTCAATTGagcg	4.7	-7.14		90	2	46
DMU31961	R	-313756	-313749	24478	24485	ggcgCTCAATTGagga	4.7	-7.14		2	43	22.5
DMU31961	D	-313713	-313706	24521	24528	accgCTCAATGAatgc	4.46	-6.71		43	48	45.5
DMU31961	R	-313665	-313658	24569	24576	tggcGCTAATGActtt	4.39	-6.65		48	133	90.5
DMU31961	R	-313532	-313525	24702	24709	tggcCGCAATTAcgtt	4.76	-7.28		133	373	253
DMU31961	D	-313159	-313152	25075	25082	tataCTCAATTGaatt	4.7	-7.14		373	2	187.5
DMU31961	R	-313157	-313150	25077	25084	cgaaTTCAATTGagta	4.92	-7.6		2	100	51
DMU31961	D	-313057	-313050	25177	25184	cttgGTCAATTAatat	6	-10.44		100	45	72.5
DMU31961	D	-313012	-313005	25222	25229	ttttATCAATTAaaat	4.39	-6.62		45	2	23.5
DMU31961	R	-313010	-313003	25224	25231	acatTTTAATTGataa	4.49	-6.79		2	709	355.5
DMU31961	D	-312301	-312294	25933	25940	ccaaGATAATTGactg	4.39	-6.66		709	2	355.5
DMU31961	R	-312299	-312292	25935	25942	gtcaGTCAATTAtctt	6	-10.44		2	197	99.5
DMU31961	D	-312102	-312095	26132	26139	catgTGTAATTAatag	4.55	-6.87		197	160	178.5
DMU31961	D	-311942	-311935	26292	26299	ggagTGCAATTGttcg	4.61	-6.96		160	748	454
DMU31961	R	-311194	-311187	27040	27047	gtgaTTTAATTAgatc	4.86	-7.45		748	65	406.5
DMU31961	D	-311129	-311122	27105	27112	ttgtTGTAATTAattt	4.55	-6.87		65	9	37
DMU31961	D	-311120	-311113	27114	27121	ttaaTTTAATTAcgaa	4.86	-7.45		9	2	5.5
DMU31961	R	-311118	-311111	27116	27123	ttttCGTAATTAaatt	4.33	-6.51		2	598	300
DMU31961	D	-310520	-310513	27714	27721	caatGTTCATTAacta	4.66	-7.05		598	2	300
DMU31961	R	-310518	-310511	27716	27723	tttaGTTAATGAacat	4.97	-7.67		2	454	228
DMU31961	D	-310064	-310057	28170	28177	tggcGGCAATTAaaat	5.69	-9.93		454	2	228
DMU31961	R	-310062	-310055	28172	28179	acatTTTAATTGccgc	4.49	-6.79		2	85	43.5
DMU31961	D	-309977	-309970	28257	28264	atatTTTAATTAtctc	4.86	-7.45		85	2	43.5
DMU31961	R	-309975	-309968	28259	28266	ccgaGATAATTAaaat	4.77	-7.31		2	20	11
DMU31961	R	-309955	-309948	28279	28286	gagaGGCCATTAaaca	4.77	-7.37		20	150	85
DMU31961	R	-309805	-309798	28429	28436	gaccTGCAATGAcgat	4.37	-6.59		150	164	157
DMU31961	D	-309641	-309634	28593	28600	aaaaTGCAATTAatat	4.98	-7.73		164	351	257.5
DMU31961	R	-309290	-309283	28944	28951	gcgcGGCCATTAaaaa	4.77	-7.37		351	507	429
DMU31961	D	-308783	-308776	29451	29458	atatTTCCATTAatac	4.37	-6.57		507	136	321.5
DMU31961	R	-308647	-308640	29587	29594	gcaaATCAATTActtg	4.39	-6.62		136	32	84
DMU31961	R	-308615	-308608	29619	29626	gaaaTTCAATTGattg	4.92	-7.6		32	85	58.5
DMU31961	D	-308530	-308523	29704	29711	ctggGCTAATGActtt	4.39	-6.65		85	971	528
DMU31961	D	-307559	-307552	30675	30682	gaatGGCAATGGaaat	4.71	-7.22		971	403	687
DMU31961	R	-307156	-307149	31078	31085	agccCGTAATTAtttg	4.33	-6.51		403	1783	1093
DMU31961	D	-305373	-305366	32861	32868	tggcTGCAATGAaaac	4.37	-6.59		1783	23	903
DMU31961	D	-305350	-305343	32884	32891	tgcaGTCAATAAttgg	4.73	-7.23		23	186	104.5
DMU31961	D	-305164	-305157	33070	33077	atggTTTAATTAattt	4.86	-7.45		186	468	327
DMU31961	D	-304696	-304689	33538	33545	aggtGATAATTGtttt	4.39	-6.66		468	113	290.5
DMU31961	D	-304583	-304576	33651	33658	gaccGCCAATGGaatg	4.44	-6.71		113	203	158
DMU31961	D	-304380	-304373	33854	33861	agcgTGCAATTAaaaa	4.98	-7.73		203	2	102.5
DMU31961	R	-304378	-304371	33856	33863	ttttTTTAATTGcacg	4.49	-6.79		2	38	20
DMU31961	R	-304340	-304333	33894	33901	aaatGGCAATTAcaaa	5.69	-9.93		38	104	71
DMU31961	D	-304236	-304229	33998	34005	gtttTGCAATTAattt	4.98	-7.73		104	524	314
DMU31961	D	-303712	-303705	34522	34529	cggtGGCAATTAaaaa	5.69	-9.93		524	2	263
DMU31961	R	-303710	-303703	34524	34531	gcttTTTAATTGccac	4.49	-6.79		2	432	217
DMU31961	D	-303278	-303271	34956	34963	acatTACAATTAttcc	4.48	-6.74		432	138	285
DMU31961	R	-303140	-303133	35094	35101	aaaaGTCAATTActtt	6	-10.44		138	347	242.5
DMU31961	D	-302793	-302786	35441	35448	cgagCGTAATTAaaat	4.33	-6.51		347	2	174.5
DMU31961	R	-302791	-302784	35443	35450	ttatTTTAATTAcgct	4.86	-7.45		2	175	88.5
DMU31961	D	-302616	-302609	35618	35625	cggaGTCCATGAaaat	4.48	-6.73		175	391	283
DMU31961	D	-302225	-302218	36009	36016	aaaaGTTAATGGaccg	4.6	-6.94		391	2	196.5
DMU31961	R	-302223	-302216	36011	36018	cacgGTCCATTAactt	5.08	-8.03		2	124	63
DMU31961	R	-302099	-302092	36135	36142	aacaGCCAATGGcagc	4.44	-6.71		124	68	96
DMU31961	D	-302031	-302024	36203	36210	aatgGTTAATTActtg	5.58	-9.1		68	248	158
DMU31961	R	-301783	-301776	36451	36458	ttgtGTCCATTAatgt	5.08	-8.03		248	277	262.5
DMU31961	D	-301506	-301499	36728	36735	ccaaCTTAATTAaacc	4.64	-7		277	2	139.5
DMU31961	R	-301504	-301497	36730	36737	ctggTTTAATTAagtt	4.86	-7.45		2	648	325
DMU31961	D	-300856	-300849	37378	37385	gctgGCCAATTAcaca	5.42	-8.94		648	99	373.5
DMU31961	D	-300757	-300750	37477	37484	cactGTTAATTGcaca	5.2	-8.23		99	2	50.5
DMU31961	R	-300755	-300748	37479	37486	cctgTGCAATTAacag	4.98	-7.73		2	40	21
DMU31961	D	-300715	-300708	37519	37526	atttTTTAATTGtatt	4.49	-6.79		40	2	21
DMU31961	R	-300713	-300706	37521	37528	aaaaTACAATTAaaaa	4.48	-6.74		2	19	10.5
DMU31961	D	-300694	-300687	37540	37547	ggttTTTAATTAaagc	4.86	-7.45		19	2	10.5
DMU31961	R	-300692	-300685	37542	37549	gagcTTTAATTAaaaa	4.86	-7.45		2	383	192.5
DMU31961	D	-300309	-300302	37925	37932	cgttGGCCATTAatgc	4.77	-7.37		383	180	281.5
DMU31961	R	-300129	-300122	38105	38112	atatTTCAATTAatcc	5.29	-8.49		180	422	301
DMU31961	R	-299707	-299700	38527	38534	cagtGCCCATTAaggc	4.5	-6.83		422	93	257.5
DMU31961	R	-299614	-299607	38620	38627	agccCGCAATTGctcg	4.39	-6.6		93	118	105.5
DMU31961	R	-299496	-299489	38738	38745	taatTTTAATTAtaac	4.86	-7.45		118	498	308
DMU31961	R	-298998	-298991	39236	39243	tacaGACAATTAttcg	5.19	-8.14		498	170	334
DMU31961	R	-298828	-298821	39406	39413	tatgTTTAATTAatcg	4.86	-7.45		170	30	100
DMU31961	R	-298798	-298791	39436	39443	aaaaTTCCATTAttta	4.37	-6.57		30	32	31
DMU31961	D	-298766	-298759	39468	39475	aaaaGTTCATTActtt	4.66	-7.05		32	554	293
DMU31961	R	-298212	-298205	40022	40029	tatgTCCAATTAtaac	4.71	-7.18		554	200	377
DMU31961	R	-298012	-298005	40222	40229	cgccCTTAATTAtggg	4.64	-7		200	254	227
DMU31961	D	-297758	-297751	40476	40483	aaatGGCAATAAataa	4.42	-6.69		254	136	195
DMU31961	D	-297622	-297615	40612	40619	gcggGCCAATTGtggt	5.05	-7.9		136	30	83
DMU31961	D	-297592	-297585	40642	40649	agacGGCAATAAaacg	4.42	-6.69		30	45	37.5
DMU31961	R	-297547	-297540	40687	40694	ttttGGCAATTGattt	5.32	-8.72		45	146	95.5
DMU31961	R	-297401	-297394	40833	40840	cgtgGGTAATTAgtcc	5.27	-8.35		146	594	370
DMU31961	D	-296807	-296800	41427	41434	cagcTTCAATTGccgg	4.92	-7.6		594	2	298
DMU31961	R	-296805	-296798	41429	41436	cgccGGCAATTGaagc	5.32	-8.72		2	212	107
DMU31961	R	-296593	-296586	41641	41648	gacaGACAATGAgagg	4.59	-6.92		212	599	405.5
DMU31961	D	-295994	-295987	42240	42247	ataaTTCAATTAataa	5.29	-8.49		599	212	405.5
DMU31961	R	-295782	-295775	42452	42459	tgcaCTCAATGAgttc	4.46	-6.71		212	765	488.5
DMU31961	D	-295017	-295010	43217	43224	tttgGGCAATGAcggg	5.09	-8.09		765	170	467.5
DMU31961	D	-294847	-294840	43387	43394	ctgtGACAATTAattc	5.19	-8.14		170	202	186
DMU31961	D	-294645	-294638	43589	43596	gcggGGCAATTAacac	5.69	-9.93		202	2	102
DMU31961	R	-294643	-294636	43591	43598	aagtGTTAATTGcccc	5.2	-8.23		2	61	31.5
DMU31961	R	-294582	-294575	43652	43659	gctgGTCAATGGgaca	5.02	-7.87		61	294	177.5
DMU31961	D	-294288	-294281	43946	43953	ccttTGTAATTAaatt	4.55	-6.87		294	2	148
DMU31961	R	-294286	-294279	43948	43955	taaaTTTAATTAcaaa	4.86	-7.45		2	475	238.5
DMU31961	D	-293811	-293804	44423	44430	tgctGGCAATAAaagg	4.42	-6.69		475	132	303.5
DMU31961	D	-293679	-293672	44555	44562	catgGCTAATTGtggc	4.62	-6.98		132	23	77.5
DMU31961	D	-293656	-293649	44578	44585	ttttGTCATTTAactg	4.53	-6.85		23	18	20.5
DMU31961	D	-293638	-293631	44596	44603	gggtCTCAATTAgtgc	5.07	-7.94		18	17	17.5
DMU31961	R	-293621	-293614	44613	44620	gggtATCAATTAcagg	4.39	-6.62		17	261	139
DMU31961	D	-293360	-293353	44874	44881	taccGTCAATTActtc	6	-10.44		261	47	154
DMU31961	R	-293313	-293306	44921	44928	tttgTTTAATTAtgta	4.86	-7.45		47	746	396.5
DMU31961	D	-292567	-292560	45667	45674	tcggGGCCATTAaagg	4.77	-7.37		746	38	392
DMU31961	R	-292529	-292522	45705	45712	cccaGCTAATTAtgat	5	-7.8		38	19	28.5
DMU31961	R	-292510	-292503	45724	45731	gatcGTTAATGAtctt	4.97	-7.67		19	33	26
DMU31961	R	-292477	-292470	45757	45764	gttaTCCAATTAgaca	4.71	-7.18		33	137	85
DMU31961	D	-292340	-292333	45894	45901	actgGCCAATGAactt	4.82	-7.4		137	205	171
DMU31961	D	-292135	-292128	46099	46106	ttttGTTAATTAactt	5.58	-9.1		205	2	103.5
DMU31961	R	-292133	-292126	46101	46108	ataaGTTAATTAacaa	5.58	-9.1		2	100	51
DMU31961	D	-292033	-292026	46201	46208	cgacGCCAATGAaagg	4.82	-7.4		100	275	187.5
DMU31961	R	-291758	-291751	46476	46483	ctatTGCAATTAgaaa	4.98	-7.73		275	1289	782
DMU31961	D	-290469	-290462	47765	47772	ggcaGTTAATTAcaag	5.58	-9.1		1289	2	645.5
DMU31961	R	-290467	-290460	47767	47774	aactTGTAATTAactg	4.55	-6.87		2	359	180.5
DMU31961	D	-290108	-290101	48126	48133	caatGGCAATTGccat	5.32	-8.72		359	2	180.5
DMU31961	R	-290106	-290099	48128	48135	ttatGGCAATTGccat	5.32	-8.72		2	20	11
DMU31961	R	-290086	-290079	48148	48155	aatgGACAATTAtggg	5.19	-8.14		20	5	12.5
DMU31961	D	-290081	-290074	48153	48160	aattGTCCATTGcagc	4.71	-7.17		5	180	92.5
DMU31961	R	-289901	-289894	48333	48340	taatGCTAATTAgtta	5	-7.8		180	431	305.5
DMU31961	R	-289470	-289463	48764	48771	cgccTTCAATGAggta	4.68	-7.11		431	788	609.5
DMU31961	D	-288682	-288675	49552	49559	tgccTTTAATTGtttg	4.49	-6.79		788	114	451
DMU31961	D	-288568	-288561	49666	49673	ttatGATAATTAtaaa	4.77	-7.31		114	1746	930
DMU31961	R	-286822	-286815	51412	51419	acccTGCAATTAtata	4.98	-7.73		1746	430	1088
DMU31961	D	-286392	-286385	51842	51849	tccaTACAATTAgcgc	4.48	-6.74		430	2	216
DMU31961	R	-286390	-286383	51844	51851	tggcGCTAATTGtatg	4.62	-6.98		2	735	368.5
DMU31961	D	-285655	-285648	52579	52586	tgttTTTAATTGtaaa	4.49	-6.79		735	2	368.5
DMU31961	R	-285653	-285646	52581	52588	atttTACAATTAaaaa	4.48	-6.74		2	47	24.5
DMU31961	D	-285606	-285599	52628	52635	aatcGATAATTAtttg	4.77	-7.31		47	58	52.5
DMU31961	D	-285548	-285541	52686	52693	ccaaGCCAATTAttta	5.42	-8.94		58	138	98
DMU31961	D	-285410	-285403	52824	52831	gtcgTTCAATTAgcgt	5.29	-8.49		138	2	70
DMU31961	R	-285408	-285401	52826	52833	ctacGCTAATTGaacg	4.62	-6.98		2	265	133.5
DMU31961	R	-285143	-285136	53091	53098	gaatTCCAATTGtaaa	4.34	-6.53		265	27	146
DMU31961	D	-285116	-285109	53118	53125	gctcGATAATTAattt	4.77	-7.31		27	155	91
DMU31961	D	-284961	-284954	53273	53280	ttaaTTTAATTGcttc	4.49	-6.79		155	21	88
DMU31961	D	-284940	-284933	53294	53301	gtcgGCCAATGAgcgg	4.82	-7.4		21	1287	654
DMU31961	R	-283653	-283646	54581	54588	ctagGCTAATGAgagc	4.39	-6.65		1287	133	710
DMU31961	D	-283520	-283513	54714	54721	cctaTCCAATTAagag	4.71	-7.18		133	363	248
DMU31961	D	-283157	-283150	55077	55084	aatgGTTAATTGtaag	5.2	-8.23		363	2	182.5
DMU31961	R	-283155	-283148	55079	55086	aactTACAATTAacca	4.48	-6.74		2	20	11
DMU31961	D	-283135	-283128	55099	55106	aaatTTCAATGAgtgt	4.68	-7.11		20	183	101.5
DMU31961	R	-282952	-282945	55282	55289	gtatGCTAATTActcc	5	-7.8		183	134	158.5
DMU31961	D	-282818	-282811	55416	55423	gttgTGTAATTAtcga	4.55	-6.87		134	2	68
DMU31961	R	-282816	-282809	55418	55425	aatcGATAATTAcaca	4.77	-7.31		2	102	52
DMU31961	R	-282714	-282707	55520	55527	atagGCTAATTAtaca	5	-7.8		102	185	143.5
DMU31961	D	-282529	-282522	55705	55712	aaaaGTTAATTAttgt	5.58	-9.1		185	67	126
DMU31961	D	-282462	-282455	55772	55779	atatCCCAATTActtc	4.49	-6.82		67	519	293
DMU31961	D	-281943	-281936	56291	56298	aatgGTCAATTGgtag	5.63	-9.6		519	107	313
DMU31961	R	-281836	-281829	56398	56405	tgaaTGCAATTAatac	4.98	-7.73		107	87	97
DMU31961	D	-281749	-281742	56485	56492	ctcaGTTAATGAgcat	4.97	-7.67		87	233	160
DMU31961	D	-281516	-281509	56718	56725	tagaGTCCATTAaaat	5.08	-8.03		233	352	292.5
DMU31961	D	-281164	-281157	57070	57077	ctatTTTAATTAcatt	4.86	-7.45		352	2	177
DMU31961	R	-281162	-281155	57072	57079	gaaaTGTAATTAaaat	4.55	-6.87		2	83	42.5
DMU31961	D	-281079	-281072	57155	57162	ccccGATAATTGcctt	4.39	-6.66		83	2	42.5
DMU31961	R	-281077	-281070	57157	57164	agaaGGCAATTAtcgg	5.69	-9.93		2	840	421
DMU31961	D	-280237	-280230	57997	58004	agtgCTTAATTAttaa	4.64	-7		840	41	440.5
DMU31961	D	-280196	-280189	58038	58045	tataTACAATTAtaat	4.48	-6.74		41	21	31
DMU31961	R	-280175	-280168	58059	58066	ttaaTTTAATTAtttc	4.86	-7.45		21	272	146.5
DMU31961	D	-279903	-279896	58331	58338	tattTTCAATTAattt	5.29	-8.49		272	59	165.5
DMU31961	R	-279844	-279837	58390	58397	ccatTTTAATTAtatg	4.86	-7.45		59	652	355.5
DMU31961	D	-279192	-279185	59042	59049	gttaGCCAATTGtcat	5.05	-7.9		652	2	327
DMU31961	R	-279190	-279183	59044	59051	ttatGACAATTGgcta	4.82	-7.41		2	305	153.5
DMU31961	D	-278885	-278878	59349	59356	cagaGGCCATTGgggg	4.4	-6.68		305	1307	806
DMU31961	D	-277578	-277571	60656	60663	gttgGCCAATTGtgaa	5.05	-7.9		1307	170	738.5
DMU31961	D	-277408	-277401	60826	60833	tgacTTCAATTAaagt	5.29	-8.49		170	2	86
DMU31961	R	-277406	-277399	60828	60835	tcacTTTAATTGaagt	4.49	-6.79		2	136	69
DMU31961	D	-277270	-277263	60964	60971	gtttGCTAATTGaaga	4.62	-6.98		136	2	69
DMU31961	R	-277268	-277261	60966	60973	gctcTTCAATTAgcaa	5.29	-8.49		2	317	159.5
DMU31961	D	-276951	-276944	61283	61290	tgttTTTAATTAattt	4.86	-7.45		317	657	487
DMU31961	R	-276294	-276287	61940	61947	aactGTCCATTGttcg	4.71	-7.17	IAB8	657	160	408.5
DMU31961	R	-276134	-276127	62100	62107	cgtcATCAATTAtggg	4.39	-6.62	IAB8	160	35	97.5	253
DMU31961	D	-276099	-276092	62135	62142	acaaTTTAATTGgccc	4.49	-6.79		35	2	18.5
DMU31961	R	-276097	-276090	62137	62144	agggGCCAATTAaatt	5.42	-8.94		2	525	263.5
DMU31961	D	-275572	-275565	62662	62669	cgctTTTAATTGcctg	4.49	-6.79		525	2	263.5
DMU31961	R	-275570	-275563	62664	62671	ggcaGGCAATTAaaag	5.69	-9.93		2	195	98.5
DMU31961	D	-275375	-275368	62859	62866	cagaGGCCATTAtaaa	4.77	-7.37		195	153	174
DMU31961	D	-275222	-275215	63012	63019	ggatGTCCATGAcagt	4.48	-6.73		153	278	215.5
DMU31961	D	-274944	-274937	63290	63297	agcaGATAATTAaaga	4.77	-7.31		278	2	140
DMU31961	R	-274942	-274935	63292	63299	cttcTTTAATTAtctg	4.86	-7.45		2	411	206.5
DMU31961	D	-274531	-274524	63703	63710	ctggGTTCATTAtttt	4.66	-7.05		411	308	359.5
DMU31961	D	-274223	-274216	64011	64018	gaaaTGTAATTAtatc	4.55	-6.87		308	628	468
DMU31961	D	-273595	-273588	64639	64646	ttttTCCAATTGattt	4.34	-6.53		628	127	377.5
DMU31961	R	-273468	-273461	64766	64773	tttgTTTAATTAatat	4.86	-7.45		127	190	158.5
DMU31961	R	-273278	-273271	64956	64963	gaatTTCAATTGgtaa	4.92	-7.6		190	142	166
DMU31961	D	-273136	-273129	65098	65105	ttctCTCAATTGccga	4.7	-7.14		142	2	72
DMU31961	R	-273134	-273127	65100	65107	aatcGGCAATTGagag	5.32	-8.72		2	272	137
DMU31961	D	-272862	-272855	65372	65379	tttcTTTAATTAagac	4.86	-7.45		272	2	137
DMU31961	R	-272860	-272853	65374	65381	gtgtCTTAATTAaaga	4.64	-7		2	410	206
DMU31961	D	-272450	-272443	65784	65791	cggaGCCAATGAaaaa	4.82	-7.4		410	517	463.5
DMU31961	D	-271933	-271926	66301	66308	gggcGGCCATTGccac	4.4	-6.68		517	2	259.5
DMU31961	R	-271931	-271924	66303	66310	gcgtGGCAATGGccgc	4.71	-7.22		2	219	110.5
DMU31961	D	-271712	-271705	66522	66529	ttaaGTTAATTAattg	5.58	-9.1		219	12	115.5
DMU31961	D	-271700	-271693	66534	66541	attgTTTAATTAaatg	4.86	-7.45		12	2	7
DMU31961	R	-271698	-271691	66536	66543	accaTTTAATTAaaca	4.86	-7.45		2	224	113
DMU31961	D	-271474	-271467	66760	66767	ctttTTCCATTAtcca	4.37	-6.57		224	192	208
DMU31961	D	-271282	-271275	66952	66959	aaaaGCCAATGAgtcc	4.82	-7.4		192	48	120
DMU31961	D	-271234	-271227	67000	67007	ttgcTCCAATTAgtgt	4.71	-7.18		48	116	82
DMU31961	R	-271118	-271111	67116	67123	cattGACAATGAtatt	4.59	-6.92		116	5	60.5
DMU31961	D	-271113	-271106	67121	67128	cattGTCAATGAaata	5.4	-8.8		5	124	64.5
DMU31961	R	-270989	-270982	67245	67252	taatTGCAATTAgtat	4.98	-7.73		124	4	64
DMU31961	D	-270985	-270978	67249	67256	taatTGCAATTAaaaa	4.98	-7.73		4	2	3
DMU31961	R	-270983	-270976	67251	67258	cgttTTTAATTGcaat	4.49	-6.79		2	138	70
DMU31961	R	-270845	-270838	67389	67396	gcgaGCTAATTGctca	4.62	-6.98	IAB7b	138	43	90.5
DMU31961	D	-270802	-270795	67432	67439	ctgaCCCAATTAaggc	4.49	-6.82	IAB7b	43	820	431.5	261
DMU31961	D	-269982	-269975	68252	68259	acgaCTTAATTAaatc	4.64	-7		820	2	411
DMU31961	R	-269980	-269973	68254	68261	tcgaTTTAATTAagtc	4.86	-7.45		2	178	90
DMU31961	D	-269802	-269795	68432	68439	agccGGCAATGAatat	5.09	-8.09		178	45	111.5
DMU31961	R	-269757	-269750	68477	68484	aactGCCAATGGcgaa	4.44	-6.71		45	305	175
DMU31961	D	-269452	-269445	68782	68789	atgtGTCATTTAttta	4.53	-6.85		305	41	173
DMU31961	R	-269411	-269404	68823	68830	agttGTCAATTAatat	6	-10.44		41	461	251
DMU31961	D	-268950	-268943	69284	69291	tcttGTTAATTGtttt	5.2	-8.23		461	410	435.5
DMU31961	D	-268540	-268533	69694	69701	cgacGGCAATGGcaac	4.71	-7.22		410	1765	1087.5
DMU31961	R	-266775	-266768	71459	71466	aaaaGCCAATGAcgaa	4.82	-7.4		1765	44	904.5
DMU31961	D	-266731	-266724	71503	71510	acatTTCAATTAagtt	5.29	-8.49		44	842	443
DMU31961	D	-265889	-265882	72345	72352	tgttGGCAATTGagac	5.32	-8.72		842	2	422
DMU31961	R	-265887	-265880	72347	72354	aagtCTCAATTGccaa	4.7	-7.14		2	666	334
DMU31961	D	-265221	-265214	73013	73020	cttgGTTAATGGacat	4.6	-6.94		666	2	334
DMU31961	R	-265219	-265212	73015	73022	tcatGTCCATTAacca	5.08	-8.03		2	100	51
DMU31961	D	-265119	-265112	73115	73122	atagGTTCATTActtt	4.66	-7.05		100	217	158.5
DMU31961	D	-264902	-264895	73332	73339	ccggGGCAATAAaata	4.42	-6.69		217	18	117.5
DMU31961	R	-264884	-264877	73350	73357	gtatGGCAATGGcata	4.71	-7.22		18	102	60
DMU31961	D	-264782	-264775	73452	73459	cggtGACAATTAccat	5.19	-8.14		102	2	52
DMU31961	R	-264780	-264773	73454	73461	atatGGTAATTGtcac	4.89	-7.57		2	46	24
DMU31961	D	-264734	-264727	73500	73507	atgcGACAATTGgcgc	4.82	-7.41		46	2	24
DMU31961	R	-264732	-264725	73502	73509	ccgcGCCAATTGtcgc	5.05	-7.9		2	195	98.5
DMU31961	R	-264537	-264530	73697	73704	ttggGCCAATGGcgtc	4.44	-6.71		195	93	144
DMU31961	R	-264444	-264437	73790	73797	ccggGTTCATTAaaat	4.66	-7.05		93	145	119
DMU31961	D	-264299	-264292	73935	73942	agcgCTCAATTAgcgg	5.07	-7.94		145	2	73.5
DMU31961	R	-264297	-264290	73937	73944	tcccGCTAATTGagcg	4.62	-6.98		2	167	84.5
DMU31961	R	-264130	-264123	74104	74111	ctgaGTCAATAAtccc	4.73	-7.23		167	1537	852
DMU31961	D	-262593	-262586	75641	75648	caacGACAATGAcaca	4.59	-6.92		1537	1447	1492
DMU31961	D	-261146	-261139	77088	77095	gtaaTTCAATTGttac	4.92	-7.6		1447	690	1068.5
DMU31961	R	-260456	-260449	77778	77785	cagtGGCAATGAggag	5.09	-8.09		690	68	379
DMU31961	D	-260388	-260381	77846	77853	tcttGGCAATTAagag	5.69	-9.93		68	15	41.5
DMU31961	D	-260373	-260366	77861	77868	ggccTTTAATTGagga	4.49	-6.79		15	2	8.5
DMU31961	R	-260371	-260364	77863	77870	ggtcCTCAATTAaagg	5.07	-7.94		2	218	110
DMU31961	D	-260153	-260146	78081	78088	gtctCGCAATTAatat	4.76	-7.28		218	122	170
DMU31961	R	-260031	-260024	78203	78210	acagTTCAATTAgaaa	5.29	-8.49		122	127	124.5
DMU31961	D	-259904	-259897	78330	78337	cgaaTTCAATTGgcag	4.92	-7.6		127	2	64.5
DMU31961	R	-259902	-259895	78332	78339	tgctGCCAATTGaatt	5.05	-7.9		2	715	358.5
DMU31961	R	-259187	-259180	79047	79054	taaaATCAATTAtatc	4.39	-6.62		715	131	423
DMU31961	R	-259056	-259049	79178	79185	gtatTTCCATTAaatg	4.37	-6.57		131	23	77
DMU31961	D	-259033	-259026	79201	79208	catcTCCAATTAtcaa	4.71	-7.18		23	2	12.5
DMU31961	R	-259031	-259024	79203	79210	gcttGATAATTGgaga	4.39	-6.66		2	2004	1003
DMU31961	D	-257027	-257020	81207	81214	ttatGGTCATTAatac	4.35	-6.54	IAB7a	2004	778	1391
DMU31961	D	-256249	-256242	81985	81992	gaaaCTTAATTAgctc	4.64	-7	IAB7a	778	2	390
DMU31961	R	-256247	-256240	81987	81994	ttgaGCTAATTAagtt	5	-7.8	IAB7a	2	971	486.5	755.833
DMU31961	R	-255276	-255269	82958	82965	ggatGGCAATAAacag	4.42	-6.69		971	362	666.5
DMU31961	R	-254914	-254907	83320	83327	tttaTTTAATTAtgga	4.86	-7.45		362	637	499.5
DMU31961	R	-254277	-254270	83957	83964	attcTCCAATTAagcc	4.71	-7.18		637	224	430.5
DMU31961	D	-254053	-254046	84181	84188	ctctTCCAATTGgatt	4.34	-6.53		224	2	113
DMU31961	R	-254051	-254044	84183	84190	aaaaTCCAATTGgaag	4.34	-6.53		2	673	337.5
DMU31961	R	-253378	-253371	84856	84863	cattTCCAATTGggaa	4.34	-6.53		673	85	379
DMU31961	R	-253293	-253286	84941	84948	ataaTTCAATGAgatc	4.68	-7.11		85	97	91
DMU31961	D	-253196	-253189	85038	85045	tgcgGTTAATTAtcat	5.58	-9.1		97	2	49.5
DMU31961	R	-253194	-253187	85040	85047	aaatGATAATTAaccg	4.77	-7.31		2	1074	538
DMU31961	D	-252120	-252113	86114	86121	tgcgTTTAATTGcttt	4.49	-6.79		1074	365	719.5
DMU31961	R	-251755	-251748	86479	86486	ttacGGCAATAAaaat	4.42	-6.69		365	20	192.5
DMU31961	D	-251735	-251728	86499	86506	ctgtGTCAATTGtggt	5.63	-9.6		20	14	17
DMU31961	R	-251721	-251714	86513	86520	gggcGGCCATTAcaac	4.77	-7.37		14	408	211
DMU31961	D	-251313	-251306	86921	86928	ttatCTCAATTAagag	5.07	-7.94		408	60	234
DMU31961	R	-251253	-251246	86981	86988	accgGGCCATTGgaaa	4.4	-6.68		60	22	41
DMU31961	D	-251231	-251224	87003	87010	gcttGCCAATTAtgat	5.42	-8.94		22	358	190
DMU31961	D	-250873	-250866	87361	87368	gaatGGTAATTGtgaa	4.89	-7.57		358	1425	891.5
DMU31961	D	-249448	-249441	88786	88793	tatcGGCCATTAaatt	4.77	-7.37		1425	531	978
DMU31961	R	-248917	-248910	89317	89324	tcgtTTCAATTActgg	5.29	-8.49		531	473	502
DMU31961	R	-248444	-248437	89790	89797	atatGGCAATGGgagt	4.71	-7.22		473	422	447.5
DMU31961	D	-248022	-248015	90212	90219	aataGTCATTTAtatt	4.53	-6.85	IAB6	422	165	293.5
DMU31961	D	-247857	-247850	90377	90384	tcgtCTTAATTAatat	4.64	-7	IAB6	165	117	141
DMU31961	D	-247740	-247733	90494	90501	atatGTTAATTAatta	5.58	-9.1	IAB6	117	6	61.5
DMU31961	R	-247734	-247727	90500	90507	gtttCTTAATTAatta	4.64	-7	IAB6	6	286	146
DMU31961	D	-247448	-247441	90786	90793	caatCGCAATTGataa	4.39	-6.6	IAB6	286	7	146.5
DMU31961	D	-247441	-247434	90793	90800	aattGATAATTGttcg	4.39	-6.66	IAB6	7	212	109.5
DMU31961	D	-247229	-247222	91005	91012	cggaTTCAATTGtcat	4.92	-7.6	IAB6	212	2	107
DMU31961	R	-247227	-247220	91007	91014	ttatGACAATTGaatc	4.82	-7.41	IAB6	2	335	168.5
DMU31961	D	-246892	-246885	91342	91349	ttttGGTAATTGcatt	4.89	-7.57	IAB6	335	2	168.5
DMU31961	R	-246890	-246883	91344	91351	tgaaTGCAATTAccaa	4.98	-7.73	IAB6	2	292	147
DMU31961	R	-246598	-246591	91636	91643	gaagTTCCATTAatag	4.37	-6.57	IAB6	292	400	346
DMU31961	R	-246198	-246191	92036	92043	tttgGTTCATTAatat	4.66	-7.05	IAB6	400	76	238
DMU31961	D	-246122	-246115	92112	92119	aaaaGTCCATTActct	5.08	-8.03	IAB6	76	27	51.5
DMU31961	D	-246095	-246088	92139	92146	gtttGTCATTTAcaag	4.53	-6.85	IAB6	27	19	23
DMU31961	D	-246076	-246069	92158	92165	cgcgGCCAATTActtt	5.42	-8.94	IAB6	19	451	235
DMU31961	D	-245625	-245618	92609	92616	ggagGGCAATGGagcg	4.71	-7.22	IAB6	451	202	326.5	169.312
DMU31961	D	-245423	-245416	92811	92818	agggGTTAATGGgttg	4.6	-6.94		202	271	236.5
DMU31961	R	-245152	-245145	93082	93089	tcatGGCAATAAgcct	4.42	-6.69		271	396	333.5
DMU31961	D	-244756	-244749	93478	93485	actaTCCAATTGaatt	4.34	-6.53		396	2	199
DMU31961	R	-244754	-244747	93480	93487	ccaaTTCAATTGgata	4.92	-7.6		2	351	176.5
DMU31961	D	-244403	-244396	93831	93838	gaatCGCAATTGgaaa	4.39	-6.6		351	2	176.5
DMU31961	R	-244401	-244394	93833	93840	ctttTCCAATTGcgat	4.34	-6.53		2	605	303.5
DMU31961	D	-243796	-243789	94438	94445	tacaCGTAATTAcatg	4.33	-6.51		605	2	303.5
DMU31961	R	-243794	-243787	94440	94447	cgcaTGTAATTAcgtg	4.55	-6.87		2	152	77
DMU31961	D	-243642	-243635	94592	94599	gtcaGTCAATTAtgta	6	-10.44		152	220	186
DMU31961	D	-243422	-243415	94812	94819	tcgcTTCAATTGgttg	4.92	-7.6		220	50	135
DMU31961	D	-243372	-243365	94862	94869	gcttTTTAATTAaatg	4.86	-7.45		50	2	26
DMU31961	R	-243370	-243363	94864	94871	aacaTTTAATTAaaaa	4.86	-7.45		2	51	26.5
DMU31961	R	-243319	-243312	94915	94922	gtttGGCAATGGcatc	4.71	-7.22		51	13	32
DMU31961	R	-243306	-243299	94928	94935	accgTTTAATTAggtt	4.86	-7.45		13	562	287.5
DMU31961	D	-242744	-242737	95490	95497	aagcTCCAATTGcgcg	4.34	-6.53		562	2	282
DMU31961	R	-242742	-242735	95492	95499	cccgCGCAATTGgagc	4.39	-6.6		2	113	57.5
DMU31961	D	-242629	-242622	95605	95612	gatgCGCAATTAgaaa	4.76	-7.28		113	523	318
DMU31961	D	-242106	-242099	96128	96135	cgcgGCTAATTAaaca	5	-7.8		523	2	262.5
DMU31961	R	-242104	-242097	96130	96137	gttgTTTAATTAgccg	4.86	-7.45		2	669	335.5
DMU31961	D	-241435	-241428	96799	96806	cggcGGCCATTGaaag	4.4	-6.68		669	745	707
DMU31961	D	-240690	-240683	97544	97551	caggGACAATTAactt	5.19	-8.14		745	2	373.5
DMU31961	R	-240688	-240681	97546	97553	gcaaGTTAATTGtccc	5.2	-8.23		2	769	385.5
DMU31961	D	-239919	-239912	98315	98322	ataaTTCCATTAaagt	4.37	-6.57		769	351	560
DMU31961	D	-239568	-239561	98666	98673	cgccCTCAATTGatcg	4.7	-7.14		351	273	312
DMU31961	D	-239295	-239288	98939	98946	aagtTTTAATTGttat	4.49	-6.79		273	120	196.5
DMU31961	R	-239175	-239168	99059	99066	ctcaATCAATTAcatt	4.39	-6.62		120	100	110
DMU31961	D	-239075	-239068	99159	99166	tgagCTCAATTAtgct	5.07	-7.94		100	213	156.5
DMU31961	D	-238862	-238855	99372	99379	ggccGTTAATGAgttc	4.97	-7.67		213	39	126
DMU31961	D	-238823	-238816	99411	99418	ggatGCTAATGAgtgg	4.39	-6.65		39	128	83.5
DMU31961	D	-238695	-238688	99539	99546	agagGTCAATAGaaat	4.35	-6.55		128	292	210
DMU31961	D	-238403	-238396	99831	99838	ttggGTTAATGAgtca	4.97	-7.67		292	226	259
DMU31961	D	-238177	-238170	100057	100064	gtctCTTAATTAtaaa	4.64	-7		226	120	173
DMU31961	D	-238057	-238050	100177	100184	gtccTTCAATTAagaa	5.29	-8.49		120	150	135
DMU31961	D	-237907	-237900	100327	100334	ttacGCCCATTAtgga	4.5	-6.83		150	53	101.5
DMU31961	D	-237854	-237847	100380	100387	tcaaGTCAATTAtcat	6	-10.44		53	2	27.5
DMU31961	R	-237852	-237845	100382	100389	tgatGATAATTGactt	4.39	-6.66		2	53	27.5
DMU31961	R	-237799	-237792	100435	100442	actcGACAATTAcgca	5.19	-8.14		53	62	57.5
DMU31961	D	-237737	-237730	100497	100504	cgtcGGCCATTGaaac	4.4	-6.68		62	702	382
DMU31961	R	-237035	-237028	101199	101206	atatTTTAATTAtgtt	4.86	-7.45		702	439	570.5
DMU31961	D	-236596	-236589	101638	101645	accaGCTAATTGacaa	4.62	-6.98		439	2	220.5
DMU31961	R	-236594	-236587	101640	101647	aattGTCAATTAgctg	6	-10.44		2	5	3.5
DMU31961	D	-236589	-236582	101645	101652	aattGACAATTAgctg	5.19	-8.14		5	2	3.5
DMU31961	R	-236587	-236580	101647	101654	gtcaGCTAATTGtcaa	4.62	-6.98		2	67	34.5
DMU31961	R	-236520	-236513	101714	101721	tcgcCTCAATTAgtca	5.07	-7.94		67	10	38.5
DMU31961	D	-236510	-236503	101724	101731	aggcGACAATTGgcgg	4.82	-7.41		10	2	6
DMU31961	R	-236508	-236501	101726	101733	cgccGCCAATTGtcgc	5.05	-7.9		2	492	247
DMU31961	D	-236016	-236009	102218	102225	gtgaGTCCATTAagtg	5.08	-8.03		492	210	351
DMU31961	R	-235806	-235799	102428	102435	ctctTTTAATTAtttc	4.86	-7.45		210	434	322
DMU31961	D	-235372	-235365	102862	102869	tccaGGCAATTGgggc	5.32	-8.72		434	334	384
DMU31961	D	-235038	-235031	103196	103203	aattTACAATTAcgac	4.48	-6.74		334	913	623.5
DMU31961	D	-234125	-234118	104109	104116	gtggCTTAATTAataa	4.64	-7		913	257	585
DMU31961	D	-233868	-233861	104366	104373	tgagTGTAATTAtttc	4.55	-6.87		257	24	140.5
DMU31961	D	-233844	-233837	104390	104397	aagaGCCAATTAcgaa	5.42	-8.94		24	109	66.5
DMU31961	D	-233735	-233728	104499	104506	tgcgTGCAATTAtcgt	4.98	-7.73	IAB5	109	2	55.5
DMU31961	R	-233733	-233726	104501	104508	taacGATAATTGcacg	4.39	-6.66	IAB5	2	245	123.5	89.5
DMU31961	R	-233488	-233481	104746	104753	gtgcGGCCATTAtgtg	4.77	-7.37		245	315	280
DMU31961	D	-233173	-233166	105061	105068	cctgGGCAATTGgttc	5.32	-8.72		315	613	464
DMU31961	D	-232560	-232553	105674	105681	taagTTCAATTGagct	4.92	-7.6		613	2	307.5
DMU31961	R	-232558	-232551	105676	105683	taagCTCAATTGaact	4.7	-7.14		2	295	148.5
DMU31961	R	-232263	-232256	105971	105978	tcgaTTCAATTAttct	5.29	-8.49		295	666	480.5
DMU31961	R	-231597	-231590	106637	106644	atatGCTAATTAattc	5	-7.8		666	55	360.5
DMU31961	R	-231542	-231535	106692	106699	atggCTTAATTAtatc	4.64	-7		55	327	191
DMU31961	R	-231215	-231208	107019	107026	attcTTCCATTAgttt	4.37	-6.57		327	142	234.5
DMU31961	R	-231073	-231066	107161	107168	aggcGTTCATTAcaca	4.66	-7.05		142	809	475.5
DMU31961	R	-230264	-230257	107970	107977	gagaCGCAATTGgggc	4.39	-6.6		809	75	442
DMU31961	R	-230189	-230182	108045	108052	ttcaGTTAATTAatga	5.58	-9.1		75	191	133
DMU31961	D	-229998	-229991	108236	108243	tttgTGCAATTAttcg	4.98	-7.73		191	87	139
DMU31961	D	-229911	-229904	108323	108330	tgaaTTTAATTAttta	4.86	-7.45		87	72	79.5
DMU31961	D	-229839	-229832	108395	108402	ctctGTTAATTAacat	5.58	-9.1		72	2	37
DMU31961	R	-229837	-229830	108397	108404	tgatGTTAATTAacag	5.58	-9.1		2	137	69.5
DMU31961	D	-229700	-229693	108534	108541	ttaaTTTAATTAtaca	4.86	-7.45		137	327	232
DMU31961	D	-229373	-229366	108861	108868	caatTGTAATTAtgca	4.55	-6.87		327	270	298.5
DMU31961	D	-229103	-229096	109131	109138	ttcaGGTAATTGtcac	4.89	-7.57		270	2	136
DMU31961	R	-229101	-229094	109133	109140	tggtGACAATTAcctg	5.19	-8.14		2	867	434.5
DMU31961	D	-228234	-228227	110000	110007	ccagGGCCATTAgtct	4.77	-7.37		867	76	471.5
DMU31961	R	-228158	-228151	110076	110083	gtgcGGCCATTGaagt	4.4	-6.68		76	23	49.5
DMU31961	R	-228135	-228128	110099	110106	aattCCCAATTActgg	4.49	-6.82		23	324	173.5
DMU31961	D	-227811	-227804	110423	110430	ttatCTCAATTAattc	5.07	-7.94		324	133	228.5
DMU31961	R	-227678	-227671	110556	110563	aaatGCTAATGAtgca	4.39	-6.65		133	112	122.5
DMU31961	R	-227566	-227559	110668	110675	gcccCGTAATTAattc	4.33	-6.51		112	32	72
DMU31961	D	-227534	-227527	110700	110707	acgaCGCAATTAtctg	4.76	-7.28		32	2	17
DMU31961	R	-227532	-227525	110702	110709	cacaGATAATTGcgtc	4.39	-6.66		2	619	310.5
DMU31961	D	-226913	-226906	111321	111328	gcatGCTAATGAatac	4.39	-6.65		619	133	376
DMU31961	D	-226780	-226773	111454	111461	ttctGTTAATTAcaat	5.58	-9.1		133	2	67.5
DMU31961	R	-226778	-226771	111456	111463	caatTGTAATTAacag	4.55	-6.87		2	10	6
DMU31961	D	-226768	-226761	111466	111473	caatTGTAATTAagat	4.55	-6.87		10	2	6
DMU31961	R	-226766	-226759	111468	111475	atatCTTAATTAcaat	4.64	-7		2	226	114
DMU31961	R	-226540	-226533	111694	111701	atggATCAATTAtgac	4.39	-6.62		226	144	185
DMU31961	R	-226396	-226389	111838	111845	gtttGGCAATAAatgc	4.42	-6.69		144	1226	685
DMU31961	R	-225170	-225163	113064	113071	aataCTCAATTGgtcg	4.7	-7.14		1226	322	774
DMU31961	D	-224848	-224841	113386	113393	cgaaGCTAATTAgcat	5	-7.8		322	2	162
DMU31961	R	-224846	-224839	113388	113395	atatGCTAATTAgctt	5	-7.8		2	1411	706.5
DMU31961	R	-223435	-223428	114799	114806	gcggGGCCATTAagag	4.77	-7.37		1411	160	785.5
DMU31961	D	-223275	-223268	114959	114966	attaGCCAATTAtatt	5.42	-8.94		160	128	144
DMU31961	D	-223147	-223140	115087	115094	ttcgGCTAATGAcaat	4.39	-6.65		128	1054	591
DMU31961	D	-222093	-222086	116141	116148	gaatTTTAATTGtctc	4.49	-6.79		1054	2	528
DMU31961	R	-222091	-222084	116143	116150	ccgaGACAATTAaaat	5.19	-8.14		2	66	34
DMU31961	D	-222025	-222018	116209	116216	gggcTTCAATTAaaac	5.29	-8.49		66	2	34
DMU31961	R	-222023	-222016	116211	116218	acgtTTTAATTGaagc	4.49	-6.79		2	422	212
DMU31961	R	-221601	-221594	116633	116640	cccaTGCAATTAgatc	4.98	-7.73		422	214	318
DMU31961	D	-221387	-221380	116847	116854	agctGACAATGAcccc	4.59	-6.92		214	664	439
DMU31961	D	-220723	-220716	117511	117518	tttaATCAATTAtcca	4.39	-6.62		664	2	333
DMU31961	R	-220721	-220714	117513	117520	gttgGATAATTGatta	4.39	-6.66		2	99	50.5
DMU31961	D	-220622	-220615	117612	117619	gggcTTCAATTGtttt	4.92	-7.6		99	139	119
DMU31961	D	-220483	-220476	117751	117758	aaatTTCAATTGaagt	4.92	-7.6		139	2	70.5
DMU31961	R	-220481	-220474	117753	117760	agacTTCAATTGaaat	4.92	-7.6		2	415	208.5
DMU31961	R	-220066	-220059	118168	118175	agatGACAATTGttgc	4.82	-7.41		415	406	410.5
DMU31961	D	-219660	-219653	118574	118581	cacgCGTAATTAaaag	4.33	-6.51		406	2	204
DMU31961	R	-219658	-219651	118576	118583	cactTTTAATTAcgcg	4.86	-7.45		2	19	10.5
DMU31961	R	-219639	-219632	118595	118602	ggaaGTCCATTAagag	5.08	-8.03		19	40	29.5
DMU31961	D	-219599	-219592	118635	118642	cacgTCCAATTAccgc	4.71	-7.18		40	2	21
DMU31961	R	-219597	-219590	118637	118644	gggcGGTAATTGgacg	4.89	-7.57		2	12	7
DMU31961	D	-219585	-219578	118649	118656	gcccTGCAATTAcatt	4.98	-7.73		12	387	199.5
DMU31961	D	-219198	-219191	119036	119043	tatcGTCAATGGagga	5.02	-7.87		387	2232	1309.5
DMU31961	D	-216966	-216959	121268	121275	gggcGTTCATTAgctg	4.66	-7.05		2232	2	1117
DMU31961	R	-216964	-216957	121270	121277	atcaGCTAATGAacgc	4.39	-6.65		2	146	74
DMU31961	D	-216818	-216811	121416	121423	ttaaGTTAATGGcgcc	4.6	-6.94		146	283	214.5
DMU31961	R	-216535	-216528	121699	121706	atgaTTCAATTAatga	5.29	-8.49		283	11	147
DMU31961	R	-216524	-216517	121710	121717	ttttCTTAATTAtgat	4.64	-7		11	470	240.5
DMU31961	R	-216054	-216047	122180	122187	agtcTTCCATTAaggc	4.37	-6.57		470	187	328.5
DMU31961	D	-215867	-215860	122367	122374	accgCGCAATTAatgg	4.76	-7.28		187	12	99.5
DMU31961	D	-215855	-215848	122379	122386	atggCGCAATTAaatg	4.76	-7.28		12	2	7
DMU31961	R	-215853	-215846	122381	122388	aacaTTTAATTGcgcc	4.49	-6.79		2	286	144
DMU31961	D	-215567	-215560	122667	122674	gtctGCTAATGAgatt	4.39	-6.65		286	812	549
DMU31961	D	-214755	-214748	123479	123486	gagtTGCAATTAcaaa	4.98	-7.73		812	15	413.5
DMU31961	D	-214740	-214733	123494	123501	aatgTTTAATTGccgg	4.49	-6.79		15	2	8.5
DMU31961	R	-214738	-214731	123496	123503	tgccGGCAATTAaaca	5.69	-9.93		2	718	360
DMU31961	R	-214020	-214013	124214	124221	aattGTCAATTAatgc	6	-10.44		718	127	422.5
DMU31961	R	-213893	-213886	124341	124348	caatTTCAATTGgtat	4.92	-7.6		127	235	181
DMU31961	R	-213658	-213651	124576	124583	aaatCGTAATTAgatg	4.33	-6.51		235	986	610.5
DMU31961	D	-212672	-212665	125562	125569	cagcGGCCATTGttga	4.4	-6.68		986	500	743
DMU31961	R	-212172	-212165	126062	126069	tattTTCAATTAgagt	5.29	-8.49		500	764	632
DMU31961	R	-211408	-211401	126826	126833	aagcGGCAATTAttat	5.69	-9.93		764	555	659.5
DMU31961	R	-210853	-210846	127381	127388	aaacGACAATTAcgag	5.19	-8.14		555	907	731
DMU31961	R	-209946	-209939	128288	128295	gtttGTCCATTGattt	4.71	-7.17		907	662	784.5
DMU31961	R	-209284	-209277	128950	128957	ttctGGCAATGGtcga	4.71	-7.22		662	509	585.5
DMU31961	D	-208775	-208768	129459	129466	tctcCTCAATTAttct	5.07	-7.94		509	187	348
DMU31961	D	-208588	-208581	129646	129653	tatgGGCAATTAttta	5.69	-9.93		187	460	323.5
DMU31961	D	-208128	-208121	130106	130113	tgccGTCAATGActtg	5.4	-8.8		460	313	386.5
DMU31961	R	-207815	-207808	130419	130426	ggccGGCCATTAgtcg	4.77	-7.37		313	364	338.5
DMU31961	D	-207451	-207444	130783	130790	gtggGGCAATGGtcga	4.71	-7.22		364	200	282
DMU31961	D	-207251	-207244	130983	130990	ttgtTTTAATTAaaag	4.86	-7.45		200	2	101
DMU31961	R	-207249	-207242	130985	130992	cactTTTAATTAaaac	4.86	-7.45		2	60	31
DMU31961	D	-207189	-207182	131045	131052	cagaATCAATTAgagt	4.39	-6.62		60	273	166.5
DMU31961	D	-206916	-206909	131318	131325	agtgCTTAATTAtgcg	4.64	-7		273	409	341
DMU31961	D	-206507	-206500	131727	131734	ccaaGGCAATGGtaat	4.71	-7.22		409	207	308
DMU31961	R	-206300	-206293	131934	131941	ccttTACAATTAtagt	4.48	-6.74		207	56	131.5
DMU31961	R	-206244	-206237	131990	131997	agtgGACAATGActaa	4.59	-6.92		56	407	231.5
DMU31961	D	-205837	-205830	132397	132404	tcgaGGCAATTGtttc	5.32	-8.72		407	14	210.5
DMU31961	R	-205823	-205816	132411	132418	gcggGTCCATGAatga	4.48	-6.73		14	269	141.5
DMU31961	D	-205554	-205547	132680	132687	caatGTCAATGGcacg	5.02	-7.87		269	400	334.5
DMU31961	R	-205154	-205147	133080	133087	tttaTTTAATTActta	4.86	-7.45		400	661	530.5
DMU31961	D	-204493	-204486	133741	133748	ttgtTGCAATTAacga	4.98	-7.73		661	2	331.5
DMU31961	R	-204491	-204484	133743	133750	ggtcGTTAATTGcaac	5.2	-8.23		2	549	275.5
DMU31961	D	-203942	-203935	134292	134299	aacaCTTAATTAgtat	4.64	-7		549	169	359
DMU31961	D	-203773	-203766	134461	134468	ctcaGATAATTGttgc	4.39	-6.66		169	46	107.5
DMU31961	D	-203727	-203720	134507	134514	agtaGATAATTAacaa	4.77	-7.31		46	2	24
DMU31961	R	-203725	-203718	134509	134516	ggttGTTAATTAtcta	5.58	-9.1		2	89	45.5
DMU31961	R	-203636	-203629	134598	134605	gcatTGCAATTAgggg	4.98	-7.73		89	646	367.5
DMU31961	D	-202990	-202983	135244	135251	tagcTTCCATTAaata	4.37	-6.57		646	10	328
DMU31961	R	-202980	-202973	135254	135261	aattGCTAATTAttta	5	-7.8		10	7	8.5
DMU31961	R	-202973	-202966	135261	135268	tcatGATAATTGctaa	4.39	-6.66		7	469	238
DMU31961	R	-202504	-202497	135730	135737	aattGTCCATTGttgc	4.71	-7.17		469	767	618
DMU31961	D	-201737	-201730	136497	136504	tgggTTCAATTAgttg	5.29	-8.49		767	130	448.5
DMU31961	D	-201607	-201600	136627	136634	gaagATCAATTAgaaa	4.39	-6.62		130	419	274.5
DMU31961	R	-201188	-201181	137046	137053	aaatGGCAATAAaagg	4.42	-6.69		419	158	288.5
DMU31961	R	-201030	-201023	137204	137211	attaTGCAATTAggtt	4.98	-7.73		158	24	91
DMU31961	D	-201006	-200999	137228	137235	cccgGCCAATGGctcc	4.44	-6.71		24	81	52.5
DMU31961	R	-200925	-200918	137309	137316	ccatGTTAATGGcttt	4.6	-6.94		81	352	216.5
DMU31961	R	-200573	-200566	137661	137668	taatGGCAATAAcgaa	4.42	-6.69		352	277	314.5
DMU31961	D	-200296	-200289	137938	137945	gcgaGGTAATTAatat	5.27	-8.35		277	163	220
DMU31961	D	-200133	-200126	138101	138108	ctgtGTCAATTAttta	6	-10.44		163	196	179.5
DMU31961	D	-199937	-199930	138297	138304	ctgcGTCATTTAatcc	4.53	-6.85		196	277	236.5
DMU31961	R	-199660	-199653	138574	138581	aagcGGCCATTGcaga	4.4	-6.68		277	182	229.5
DMU31961	D	-199478	-199471	138756	138763	aatcGCCCATTAtaag	4.5	-6.83		182	54	118
DMU31961	D	-199424	-199417	138810	138817	tctcCGTAATTAcagt	4.33	-6.51		54	2	28
DMU31961	R	-199422	-199415	138812	138819	acacTGTAATTAcgga	4.55	-6.87		2	383	192.5
DMU31961	R	-199039	-199032	139195	139202	gtggTTTAATTAttta	4.86	-7.45		383	96	239.5
DMU31961	D	-198943	-198936	139291	139298	ttgcGTTAATTGctct	5.2	-8.23		96	44	70
DMU31961	D	-198899	-198892	139335	139342	aagtGGTAATTGcagg	4.89	-7.57		44	2	23
DMU31961	R	-198897	-198890	139337	139344	taccTGCAATTAccac	4.98	-7.73		2	13	7.5
DMU31961	D	-198884	-198877	139350	139357	gtatTTCCATTAcaaa	4.37	-6.57		13	1803	908
DMU31961	R	-197081	-197074	141153	141160	aaatTTCAATTAagac	5.29	-8.49		1803	112	957.5
DMU31961	D	-196969	-196962	141265	141272	tgctCGTAATTAtcca	4.33	-6.51		112	2	57
DMU31961	R	-196967	-196960	141267	141274	actgGATAATTAcgag	4.77	-7.31		2	108	55
DMU31961	D	-196859	-196852	141375	141382	acttGTCCATGAaggc	4.48	-6.73		108	33	70.5
DMU31961	D	-196826	-196819	141408	141415	ggccGTCAATTGgtac	5.63	-9.6		33	84	58.5
DMU31961	R	-196742	-196735	141492	141499	ccatTCCAATTAtaat	4.71	-7.18		84	151	117.5
DMU31961	R	-196591	-196584	141643	141650	ttatGCTAATGAcatt	4.39	-6.65		151	201	176
DMU31961	R	-196390	-196383	141844	141851	gaatCTTAATTAttta	4.64	-7		201	202	201.5
DMU31961	D	-196188	-196181	142046	142053	cgtcCGCAATTActcg	4.76	-7.28		202	300	251
DMU31961	R	-195888	-195881	142346	142353	agcaCGTAATTAttat	4.33	-6.51		300	289	294.5
DMU31961	R	-195599	-195592	142635	142642	actgGCCAATTAagcc	5.42	-8.94		289	500	394.5
DMU31961	D	-195099	-195092	143135	143142	gttgCGCAATTAgacg	4.76	-7.28		500	592	546
DMU31961	D	-194507	-194500	143727	143734	ttttCGCAATTGgaca	4.39	-6.6		592	2	297
DMU31961	R	-194505	-194498	143729	143736	actgTCCAATTGcgaa	4.34	-6.53		2	175	88.5
DMU31961	D	-194330	-194323	143904	143911	tccgCGCAATTGttgg	4.39	-6.6		175	595	385
DMU31961	R	-193735	-193728	144499	144506	actgGGCAATGGcggt	4.71	-7.22		595	73	334
DMU31961	R	-193662	-193655	144572	144579	ccagTGCAATTAtgct	4.98	-7.73		73	74	73.5
DMU31961	D	-193588	-193581	144646	144653	gaggGGCAATGGacaa	4.71	-7.22		74	2	38
DMU31961	R	-193586	-193579	144648	144655	tattGTCCATTGcccc	4.71	-7.17		2	299	150.5
DMU31961	D	-193287	-193280	144947	144954	tgccGGCAATGAtaag	5.09	-8.09		299	330	314.5
DMU31961	R	-192957	-192950	145277	145284	ttttGTCATTTAatgc	4.53	-6.85		330	698	514
DMU31961	R	-192259	-192252	145975	145982	cgacGCTAATTGctga	4.62	-6.98		698	68	383
DMU31961	D	-192191	-192184	146043	146050	tgggCCCAATTAgtct	4.49	-6.82		68	173	120.5
DMU31961	D	-192018	-192011	146216	146223	ttaaTTTAATTGatct	4.49	-6.79		173	2	87.5
DMU31961	R	-192016	-192009	146218	146225	taagATCAATTAaatt	4.39	-6.62		2	21	11.5
DMU31961	D	-191995	-191988	146239	146246	tctgTTTAATTAactc	4.86	-7.45		21	2	11.5
DMU31961	R	-191993	-191986	146241	146248	gagaGTTAATTAaaca	5.58	-9.1		2	193	97.5
DMU31961	D	-191800	-191793	146434	146441	ttgaGCCAATGAagac	4.82	-7.4		193	249	221
DMU31961	R	-191551	-191544	146683	146690	tggcGCTAATTAgggg	5	-7.8		249	56	152.5
DMU31961	D	-191495	-191488	146739	146746	acgaGCCCATTAaaag	4.5	-6.83		56	182	119
DMU31961	R	-191313	-191306	146921	146928	gctgGCCAATGAgttt	4.82	-7.4		182	108	145
DMU31961	R	-191205	-191198	147029	147036	gtttGTTAATTAtggt	5.58	-9.1		108	777	442.5
DMU31961	D	-190428	-190421	147806	147813	aaatGGCAATAAataa	4.42	-6.69		777	671	724
DMU31961	R	-189757	-189750	148477	148484	ttttTACAATTAagga	4.48	-6.74		671	179	425
DMU31961	R	-189578	-189571	148656	148663	gccaTCCAATTAttac	4.71	-7.18		179	30	104.5
DMU31961	R	-189548	-189541	148686	148693	aagcTTCAATTAgaaa	5.29	-8.49		30	164	97
DMU31961	D	-189384	-189377	148850	148857	aagaGTCCATTAaacg	5.08	-8.03		164	240	202
DMU31961	R	-189144	-189137	149090	149097	gggaGGCCATTAtgat	4.77	-7.37		240	678	459
DMU31961	D	-188466	-188459	149768	149775	ttgcGTCATTTAcgag	4.53	-6.85		678	27	352.5
DMU31961	D	-188439	-188432	149795	149802	ttagTGCAATTAaaca	4.98	-7.73		27	2	14.5
DMU31961	R	-188437	-188430	149797	149804	gctgTTTAATTGcact	4.49	-6.79		2	424	213
DMU31961	D	-188013	-188006	150221	150228	gagtGACAATTGattc	4.82	-7.41		424	73	248.5
DMU31961	D	-187940	-187933	150294	150301	tatgGGCAATTActcc	5.69	-9.93		73	335	204
DMU31961	D	-187605	-187598	150629	150636	tgttTACAATTAgaat	4.48	-6.74		335	191	263
DMU31961	D	-187414	-187407	150820	150827	aatgGTCAATAAtaat	4.73	-7.23		191	751	471
DMU31961	D	-186663	-186656	151571	151578	aataTTCAATTAcaaa	5.29	-8.49		751	371	561
DMU31961	D	-186292	-186285	151942	151949	ctctGGCCATTAacgc	4.77	-7.37		371	2	186.5
DMU31961	R	-186290	-186283	151944	151951	cggcGTTAATGGccag	4.6	-6.94		2	47	24.5
DMU31961	D	-186243	-186236	151991	151998	ctttGGTCATTAaaga	4.35	-6.54		47	63	55
DMU31961	D	-186180	-186173	152054	152061	atggATCAATTAttca	4.39	-6.62		63	8	35.5
DMU31961	D	-186172	-186165	152062	152069	attaTTCAATTGttat	4.92	-7.6		8	183	95.5
DMU31961	D	-185989	-185982	152245	152252	attaTTTAATTGaagg	4.49	-6.79		183	2	92.5
DMU31961	R	-185987	-185980	152247	152254	atccTTCAATTAaata	5.29	-8.49		2	213	107.5
DMU31961	R	-185774	-185767	152460	152467	ggaaTGTAATTAtaaa	4.55	-6.87		213	17	115
DMU31961	R	-185757	-185750	152477	152484	tgttGGTCATTAggta	4.35	-6.54		17	804	410.5
DMU31961	R	-184953	-184946	153281	153288	cggcGGCAATAAgaaa	4.42	-6.69		804	805	804.5
DMU31961	R	-184148	-184141	154086	154093	ttgcTTTAATTActtt	4.86	-7.45		805	190	497.5
DMU31961	R	-183958	-183951	154276	154283	ggtcATCAATTAcgcg	4.39	-6.62		190	16	103
DMU31961	D	-183942	-183935	154292	154299	gcatTTTAATTGcttt	4.49	-6.79		16	722	369
DMU31961	D	-183220	-183213	155014	155021	agatGTTCATTAaaga	4.66	-7.05		722	285	503.5
DMU31961	R	-182935	-182928	155299	155306	tttgGTTAATGGctag	4.6	-6.94		285	1092	688.5
DMU31961	R	-181843	-181836	156391	156398	taggGTCATTTAagat	4.53	-6.85		1092	32	562
DMU31961	D	-181811	-181804	156423	156430	taaaGTCAATGAcaaa	5.4	-8.8		32	303	167.5
DMU31961	R	-181508	-181501	156726	156733	acccGATAATTAgagc	4.77	-7.31		303	250	276.5
DMU31961	D	-181258	-181251	156976	156983	agtgTGCAATTAgagc	4.98	-7.73		250	51	150.5
DMU31961	R	-181207	-181200	157027	157034	aaatGCTAATGAggtg	4.39	-6.65		51	834	442.5
DMU31961	R	-180373	-180366	157861	157868	atttTTTAATTAtagt	4.86	-7.45		834	242	538
DMU31961	R	-180131	-180124	158103	158110	aagtGTTCATTAcgaa	4.66	-7.05		242	551	396.5
DMU31961	D	-179580	-179573	158654	158661	gactGTCAATTGgcct	5.63	-9.6		551	2	276.5
DMU31961	R	-179578	-179571	158656	158663	tcagGCCAATTGacag	5.05	-7.9		2	89	45.5
DMU31961	D	-179489	-179482	158745	158752	gcatGTTAATTAaaca	5.58	-9.1		89	2	45.5
DMU31961	R	-179487	-179480	158747	158754	actgTTTAATTAacat	4.86	-7.45		2	22	12
DMU31961	D	-179465	-179458	158769	158776	aattGTTAATTGacga	5.2	-8.23		22	2	12
DMU31961	R	-179463	-179456	158771	158778	gatcGTCAATTAacaa	6	-10.44		2	202	102
DMU31961	D	-179261	-179254	158973	158980	gggtGTCAATAAatcg	4.73	-7.23		202	899	550.5
DMU31961	D	-178362	-178355	159872	159879	ttttCTTAATTAtctg	4.64	-7		899	2	450.5
DMU31961	R	-178360	-178353	159874	159881	tccaGATAATTAagaa	4.77	-7.31		2	198	100
DMU31961	R	-178162	-178155	160072	160079	agaaTTTAATTAtttt	4.86	-7.45		198	346	272
DMU31961	D	-177816	-177809	160418	160425	gtatTTTAATTAaaaa	4.86	-7.45		346	2	174
DMU31961	R	-177814	-177807	160420	160427	cattTTTAATTAaaat	4.86	-7.45		2	604	303
DMU31961	D	-177210	-177203	161024	161031	gtacCGCAATTAaccg	4.76	-7.28		604	2	303
DMU31961	R	-177208	-177201	161026	161033	tccgGTTAATTGcggt	5.2	-8.23		2	784	393
DMU31961	D	-176424	-176417	161810	161817	cgcgTTTAATTAgttc	4.86	-7.45		784	51	417.5
DMU31961	D	-176373	-176366	161861	161868	cactGTCAATTGctgg	5.63	-9.6		51	23	37
DMU31961	D	-176350	-176343	161884	161891	aggcGGTCATTAatcg	4.35	-6.54		23	71	47
DMU31961	D	-176279	-176272	161955	161962	ttgaGTTAATGGcgct	4.6	-6.94		71	135	103
DMU31961	R	-176144	-176137	162090	162097	aattGTTAATTActat	5.58	-9.1		135	30	82.5
DMU31961	R	-176114	-176107	162120	162127	ctggGTTAATTAgtca	5.58	-9.1		30	264	147
DMU31961	R	-175850	-175843	162384	162391	ggttCGCAATTAcatg	4.76	-7.28		264	13	138.5
DMU31961	D	-175837	-175830	162397	162404	accgTTTAATTGggct	4.49	-6.79		13	2	7.5
DMU31961	R	-175835	-175828	162399	162406	cgagCCCAATTAaacg	4.49	-6.82		2	353	177.5
DMU31961	R	-175482	-175475	162752	162759	gtgaGTTAATTActtg	5.58	-9.1		353	225	289
DMU31961	D	-175257	-175250	162977	162984	ccacGACAATTAataa	5.19	-8.14		225	207	216
DMU31961	D	-175050	-175043	163184	163191	cagtTTTAATTAacta	4.86	-7.45		207	2	104.5
DMU31961	R	-175048	-175041	163186	163193	aataGTTAATTAaaac	5.58	-9.1		2	235	118.5
DMU31961	R	-174813	-174806	163421	163428	gagcCGCAATTAtggc	4.76	-7.28		235	41	138
DMU31961	R	-174772	-174765	163462	163469	ttgtGGCAATAAttca	4.42	-6.69		41	139	90
DMU31961	D	-174633	-174626	163601	163608	taaaTTCAATTGttgg	4.92	-7.6		139	24	81.5
DMU31961	R	-174609	-174602	163625	163632	ccctGCCAATGAcatt	4.82	-7.4		24	703	363.5
DMU31961	D	-173906	-173899	164328	164335	cacaGACAATTGccga	4.82	-7.41		703	2	352.5
DMU31961	R	-173904	-173897	164330	164337	agtcGGCAATTGtctg	5.32	-8.72		2	271	136.5
DMU31961	D	-173633	-173626	164601	164608	ccatTTCCATTAagtt	4.37	-6.57		271	260	265.5
DMU31961	R	-173373	-173366	164861	164868	atctCGCAATTAatca	4.76	-7.28		260	593	426.5
DMU31961	R	-172780	-172773	165454	165461	ttttGTTAATGGctgc	4.6	-6.94		593	810	701.5
DMU31961	D	-171970	-171963	166264	166271	ggcaGCCAATGAaggc	4.82	-7.4		810	86	448
DMU31961	D	-171884	-171877	166350	166357	cgagGCCAATTGcaga	5.05	-7.9		86	2	44
DMU31961	R	-171882	-171875	166352	166359	catcTGCAATTGgcct	4.61	-6.96		2	498	250
DMU31961	R	-171384	-171377	166850	166857	gccaTTCAATGAtcac	4.68	-7.11		498	80	289
DMU31961	D	-171304	-171297	166930	166937	aattTGCAATTAaatt	4.98	-7.73		80	2	41
DMU31961	R	-171302	-171295	166932	166939	gcaaTTTAATTGcaaa	4.49	-6.79		2	1051	526.5
DMU31961	D	-170251	-170244	167983	167990	tatcGTTAATTAtata	5.58	-9.1		1051	47	549
DMU31961	D	-170204	-170197	168030	168037	ccatTTTAATTGcgaa	4.49	-6.79		47	2	24.5
DMU31961	R	-170202	-170195	168032	168039	aattCGCAATTAaaat	4.76	-7.28		2	237	119.5
DMU31961	R	-169965	-169958	168269	168276	ccctGCTAATTGtgtg	4.62	-6.98		237	458	347.5
DMU31961	D	-169507	-169500	168727	168734	aaagTTTAATTAgtct	4.86	-7.45		458	641	549.5
DMU31961	D	-168866	-168859	169368	169375	tttgTACAATTAaatg	4.48	-6.74		641	2	321.5
DMU31961	R	-168864	-168857	169370	169377	ggcaTTTAATTGtaca	4.49	-6.79		2	309	155.5
DMU31961	R	-168555	-168548	169679	169686	tgccGGCAATTAgttt	5.69	-9.93		309	522	415.5
DMU31961	D	-168033	-168026	170201	170208	tattTTTAATTGttaa	4.49	-6.79		522	317	419.5
DMU31961	D	-167716	-167709	170518	170525	ttcaCTCAATTGcagc	4.7	-7.14		317	2	159.5
DMU31961	R	-167714	-167707	170520	170527	tggcTGCAATTGagtg	4.61	-6.96		2	25	13.5
DMU31961	D	-167689	-167682	170545	170552	gcgcGCTAATTGattt	4.62	-6.98		25	2	13.5
DMU31961	R	-167687	-167680	170547	170554	aaaaATCAATTAgcgc	4.39	-6.62		2	9	5.5
DMU31961	D	-167678	-167671	170556	170563	gattTTTAATTGgaaa	4.49	-6.79		9	2	5.5
DMU31961	R	-167676	-167669	170558	170565	atttTCCAATTAaaaa	4.71	-7.18		2	142	72
DMU31961	R	-167534	-167527	170700	170707	gaatTTCAATTAcaca	5.29	-8.49		142	45	93.5
DMU31961	D	-167489	-167482	170745	170752	ttaaGTCAATTGctta	5.63	-9.6		45	114	79.5
DMU31961	D	-167375	-167368	170859	170866	tgaaTGCAATTAaaat	4.98	-7.73		114	2	58
DMU31961	R	-167373	-167366	170861	170868	atatTTTAATTGcatt	4.49	-6.79		2	33	17.5
DMU31961	R	-167340	-167333	170894	170901	agcgTTTAATTAgtaa	4.86	-7.45		33	11	22
DMU31961	D	-167329	-167322	170905	170912	acgcTTCAATTAaata	5.29	-8.49		11	2	6.5
DMU31961	R	-167327	-167320	170907	170914	aataTTTAATTGaagc	4.49	-6.79		2	651	326.5
DMU31961	R	-166676	-166669	171558	171565	ggccGCCAATGGctaa	4.44	-6.71	IAB2	651	8	329.5
DMU31961	D	-166668	-166661	171566	171573	tggcGGCCATTGcggg	4.4	-6.68	IAB2	8	317	162.5
DMU31961	D	-166351	-166344	171883	171890	tgaaTTTAATTAtcgg	4.86	-7.45	IAB2	317	2	159.5
DMU31961	R	-166349	-166342	171885	171892	atccGATAATTAaatt	4.77	-7.31	IAB2	2	841	421.5
DMU31961	R	-165508	-165501	172726	172733	cgggGTCCATTGcgga	4.71	-7.17	IAB2	841	1279	1060	426.6
DMU31961	D	-164229	-164222	174005	174012	tagaGGCAATTAactg	5.69	-9.93		1279	2	640.5
DMU31961	R	-164227	-164220	174007	174014	tccaGTTAATTGcctc	5.2	-8.23		2	763	382.5
DMU31961	R	-163464	-163457	174770	174777	cttgCGCAATTGtttt	4.39	-6.6		763	500	631.5
DMU31961	R	-162964	-162957	175270	175277	atttGTCAATAAttgt	4.73	-7.23		500	1141	820.5
DMU31961	D	-161823	-161816	176411	176418	taaaTTCAATGAaaaa	4.68	-7.11		1141	276	708.5
DMU31961	R	-161547	-161540	176687	176694	attcGTTAATTAatat	5.58	-9.1		276	97	186.5
DMU31961	D	-161450	-161443	176784	176791	gcatTGCAATTGgcag	4.61	-6.96		97	2	49.5
DMU31961	R	-161448	-161441	176786	176793	tgctGCCAATTGcaat	5.05	-7.9		2	44	23
DMU31961	D	-161404	-161397	176830	176837	cgccTTTAATTAaatt	4.86	-7.45		44	2	23
DMU31961	R	-161402	-161395	176832	176839	taaaTTTAATTAaagg	4.86	-7.45		2	8	5
DMU31961	D	-161394	-161387	176840	176847	taaaTTTAATTAatgc	4.86	-7.45		8	673	340.5
DMU31961	D	-160721	-160714	177513	177520	atcaCTCAATTGatat	4.7	-7.14		673	352	512.5
DMU31961	R	-160369	-160362	177865	177872	gagcTGTAATTAggcc	4.55	-6.87		352	86	219
DMU31961	D	-160283	-160276	177951	177958	ggcgGCCAATTAccga	5.42	-8.94		86	2	44
DMU31961	R	-160281	-160274	177953	177960	actcGGTAATTGgccg	4.89	-7.57		2	20	11
DMU31961	D	-160261	-160254	177973	177980	tgcgTTTAATTGaaac	4.49	-6.79		20	2	11
DMU31961	R	-160259	-160252	177975	177982	atgtTTCAATTAaacg	5.29	-8.49		2	553	277.5
DMU31961	D	-159706	-159699	178528	178535	tcaaTTCAATTAatta	5.29	-8.49		553	6	279.5
DMU31961	R	-159700	-159693	178534	178541	cattTTTAATTAattg	4.86	-7.45		6	377	191.5
DMU31961	R	-159323	-159316	178911	178918	taatGCCAATGGggtc	4.44	-6.71		377	1187	782
DMU31961	D	-158136	-158129	180098	180105	cgacTCCAATTGtttt	4.34	-6.53		1187	131	659
DMU31961	R	-158005	-157998	180229	180236	aaagGGCCATTGcatc	4.4	-6.68		131	220	175.5
DMU31961	D	-157785	-157778	180449	180456	acgcGGCCATTGtgct	4.4	-6.68		220	120	170
DMU31961	D	-157665	-157658	180569	180576	taatTTTAATTGtctg	4.49	-6.79		120	2	61
DMU31961	R	-157663	-157656	180571	180578	ggcaGACAATTAaaat	5.19	-8.14		2	65	33.5
DMU31961	D	-157598	-157591	180636	180643	ggctGGCAATTGaacg	5.32	-8.72		65	2	33.5
DMU31961	R	-157596	-157589	180638	180645	gccgTTCAATTGccag	4.92	-7.6		2	424	213
DMU31961	D	-157172	-157165	181062	181069	gtaaTTCCATTAtttg	4.37	-6.57		424	24	224
DMU31961	D	-157148	-157141	181086	181093	taaaCTTAATTAatac	4.64	-7		24	308	166
DMU31961	D	-156840	-156833	181394	181401	atagCCCAATTAcgaa	4.49	-6.82		308	499	403.5
DMU31961	D	-156341	-156334	181893	181900	ttttGGCCATTGtctc	4.4	-6.68		499	881	690
DMU31961	R	-155460	-155453	182774	182781	aaatTTTAATTAattc	4.86	-7.45		881	257	569
DMU31961	R	-155203	-155196	183031	183038	atgtTACAATTAatgg	4.48	-6.74		257	219	238
DMU31961	D	-154984	-154977	183250	183257	aaccGCCAATTGaatc	5.05	-7.9		219	2	110.5
DMU31961	R	-154982	-154975	183252	183259	atgaTTCAATTGgcgg	4.92	-7.6		2	337	169.5
DMU31961	D	-154645	-154638	183589	183596	actgTTCCATTAataa	4.37	-6.57		337	564	450.5
DMU31961	R	-154081	-154074	184153	184160	aggaGTTAATTAgttg	5.58	-9.1		564	637	600.5
DMU31961	D	-153444	-153437	184790	184797	ctttGCTAATGAggac	4.39	-6.65		637	16	326.5
DMU31961	D	-153428	-153421	184806	184813	acctGACAATTGctga	4.82	-7.41		16	348	182
DMU31961	D	-153080	-153073	185154	185161	tgatGTTAATTAgctt	5.58	-9.1		348	2	175
DMU31961	R	-153078	-153071	185156	185163	tcaaGCTAATTAacat	5	-7.8		2	145	73.5
DMU31961	R	-152933	-152926	185301	185308	ttgtGTTCATTAgttc	4.66	-7.05		145	120	132.5
DMU31961	D	-152813	-152806	185421	185428	ctgtGTTAATTAcgac	5.58	-9.1		120	2	61
DMU31961	R	-152811	-152804	185423	185430	aggtCGTAATTAacac	4.33	-6.51		2	59	30.5
DMU31961	R	-152752	-152745	185482	185489	ttcgGGCCATTAgtta	4.77	-7.37		59	294	176.5
DMU31961	D	-152458	-152451	185776	185783	ggtcATCAATTAattc	4.39	-6.62		294	11	152.5
DMU31961	D	-152447	-152440	185787	185794	aattCGCAATTAattg	4.76	-7.28		11	6	8.5
DMU31961	R	-152441	-152434	185793	185800	cattTACAATTAattg	4.48	-6.74		6	147	76.5
DMU31961	D	-152294	-152287	185940	185947	tcatTTTAATTGgtct	4.49	-6.79		147	662	404.5
DMU31961	R	-151632	-151625	186602	186609	ggccGGCAATAAccgt	4.42	-6.69		662	8	335
DMU31961	D	-151624	-151617	186610	186617	tgccGGCCATTAaaaa	4.77	-7.37		8	97	52.5
DMU31961	D	-151527	-151520	186707	186714	cgatTGCAATTGttga	4.61	-6.96		97	94	95.5
DMU31961	D	-151433	-151426	186801	186808	taaaTTCAATTGgagg	4.92	-7.6		94	2	48
DMU31961	R	-151431	-151424	186803	186810	ctccTCCAATTGaatt	4.34	-6.53		2	247	124.5
DMU31961	D	-151184	-151177	187050	187057	aaatGCCCATTAgtca	4.5	-6.83		247	48	147.5
DMU31961	D	-151136	-151129	187098	187105	cgttTTTAATTAtaat	4.86	-7.45		48	622	335
DMU31961	R	-150514	-150507	187720	187727	ccaaGTCCATGAgaac	4.48	-6.73		622	38	330
DMU31961	D	-150476	-150469	187758	187765	caccGTCAATAAcaaa	4.73	-7.23		38	78	58
DMU31961	R	-150398	-150391	187836	187843	aaatGCCAATGAtatt	4.82	-7.4		78	153	115.5
DMU31961	D	-150245	-150238	187989	187996	actcCGTAATTAtatt	4.33	-6.51		153	156	154.5
DMU31961	R	-150089	-150082	188145	188152	ttgcGGCAATAAataa	4.42	-6.69		156	1129	642.5
DMU31961	D	-148960	-148953	189274	189281	gaacGGCCATTGttgc	4.4	-6.68		1129	259	694
DMU31961	D	-148701	-148694	189533	189540	cagcCGCAATTGtcct	4.39	-6.6		259	2	130.5
DMU31961	R	-148699	-148692	189535	189542	atagGACAATTGcggc	4.82	-7.41		2	677	339.5
DMU31961	D	-148022	-148015	190212	190219	caagGTTAATTGccag	5.2	-8.23		677	2	339.5
DMU31961	R	-148020	-148013	190214	190221	ccctGGCAATTAacct	5.69	-9.93		2	462	232
DMU31961	D	-147558	-147551	190676	190683	caacGCCCATTAcaat	4.5	-6.83		462	236	349
DMU31961	R	-147322	-147315	190912	190919	tcacGTTAATGGtgca	4.6	-6.94		236	267	251.5
DMU31961	R	-147055	-147048	191179	191186	atttTCCAATTGataa	4.34	-6.53		267	36	151.5
DMU31961	R	-147019	-147012	191215	191222	tgccTTCAATGAattc	4.68	-7.11		36	76	56
DMU31961	D	-146943	-146936	191291	191298	aacaCTTAATTAagcc	4.64	-7		76	2	39
DMU31961	R	-146941	-146934	191293	191300	tgggCTTAATTAagtg	4.64	-7		2	250	126
DMU31961	D	-146691	-146684	191543	191550	tcttGGCAATTGcttg	5.32	-8.72		250	525	387.5
DMU31961	D	-146166	-146159	192068	192075	acttGACAATTAtata	5.19	-8.14		525	167	346
DMU31961	D	-145999	-145992	192235	192242	tcatTTCAATTAgcga	5.29	-8.49		167	2	84.5
DMU31961	R	-145997	-145990	192237	192244	attcGCTAATTGaaat	4.62	-6.98		2	124	63
DMU31961	R	-145873	-145866	192361	192368	ggccGTTAATTAtgca	5.58	-9.1		124	361	242.5
DMU31961	D	-145512	-145505	192722	192729	tgtcCGTAATTAaaag	4.33	-6.51		361	2	181.5
DMU31961	R	-145510	-145503	192724	192731	gactTTTAATTAcgga	4.86	-7.45		2	144	73
DMU31961	D	-145366	-145359	192868	192875	tcaaTTTAATTAattg	4.86	-7.45		144	6	75
DMU31961	R	-145360	-145353	192874	192881	tatcCGCAATTAatta	4.76	-7.28		6	128	67
DMU31961	D	-145232	-145225	193002	193009	ttatCTCAATGAggca	4.46	-6.71		128	31	79.5
DMU31961	R	-145201	-145194	193033	193040	aaagTCCAATTAatga	4.71	-7.18		31	155	93
DMU31961	D	-145046	-145039	193188	193195	cacaGCCAATGAattt	4.82	-7.4		155	30	92.5
DMU31961	D	-145016	-145009	193218	193225	aactTTTAATTAcgcg	4.86	-7.45		30	2	16
DMU31961	R	-145014	-145007	193220	193227	cgcgCGTAATTAaaag	4.33	-6.51		2	138	70
DMU31961	R	-144876	-144869	193358	193365	gcaaGTTAATGAgaat	4.97	-7.67		138	50	94
DMU31961	D	-144826	-144819	193408	193415	tcatGCCAATTAaacc	5.42	-8.94		50	2	26
DMU31961	R	-144824	-144817	193410	193417	aaggTTTAATTGgcat	4.49	-6.79		2	1834	918
DMU31961	R	-142990	-142983	195244	195251	tattTTCAATGAtcaa	4.68	-7.11		1834	461	1147.5
DMU31961	R	-142529	-142522	195705	195712	aatgGCCCATTAgtgc	4.5	-6.83		461	5	233
DMU31961	D	-142524	-142517	195710	195717	aatgGGCCATTAaatg	4.77	-7.37		5	371	188
DMU31961	R	-142153	-142146	196081	196088	cgagTTCCATTAcgga	4.37	-6.57		371	383	377
DMU31961	D	-141770	-141763	196464	196471	agcgGCTAATTGagaa	4.62	-6.98		383	2	192.5
DMU31961	R	-141768	-141761	196466	196473	ttttCTCAATTAgccg	5.07	-7.94		2	549	275.5
DMU31961	R	-141219	-141212	197015	197022	ccgcTGCAATTAcgag	4.98	-7.73		549	244	396.5
DMU31961	D	-140975	-140968	197259	197266	tctcCCCAATTAcaag	4.49	-6.82		244	193	218.5
DMU31961	R	-140782	-140775	197452	197459	ttacGGCAATAAcgag	4.42	-6.69		193	77	135
DMU31961	R	-140705	-140698	197529	197536	ccatGTCCATTAtaac	5.08	-8.03		77	210	143.5
DMU31961	R	-140495	-140488	197739	197746	ataaTGCAATTGattc	4.61	-6.96		210	170	190
DMU31961	R	-140325	-140318	197909	197916	tattGGCCATTAagga	4.77	-7.37		170	470	320
DMU31961	D	-139855	-139848	198379	198386	ggcaGTTCATTAgggt	4.66	-7.05		470	17	243.5
DMU31961	D	-139838	-139831	198396	198403	acatTGCAATTGggta	4.61	-6.96		17	83	50
DMU31961	D	-139755	-139748	198479	198486	aattGGTCATTAtgca	4.35	-6.54		83	166	124.5
DMU31961	R	-139589	-139582	198645	198652	aaaaTTCAATTGgttt	4.92	-7.6		166	178	172
DMU31961	D	-139411	-139404	198823	198830	agcgTTTAATTAaaag	4.86	-7.45		178	2	90
DMU31961	R	-139409	-139402	198825	198832	agctTTTAATTAaacg	4.86	-7.45		2	360	181
DMU31961	R	-139049	-139042	199185	199192	gctaGGCCATTAagga	4.77	-7.37		360	1084	722
DMU31961	D	-137965	-137958	200269	200276	ttatTTTAATTGtgtt	4.49	-6.79		1084	299	691.5
DMU31961	R	-137666	-137659	200568	200575	tatgGTCAATAAagca	4.73	-7.23		299	322	310.5
DMU31961	R	-137344	-137337	200890	200897	ccaaTTCCATTAattc	4.37	-6.57		322	157	239.5
DMU31961	R	-137187	-137180	201047	201054	acttGCCAATGGttgg	4.44	-6.71		157	125	141
DMU31961	R	-137062	-137055	201172	201179	tgttTTTAATTActcg	4.86	-7.45		125	27	76
DMU31961	D	-137035	-137028	201199	201206	tttgGGCCATTAaggc	4.77	-7.37		27	497	262
DMU31961	D	-136538	-136531	201696	201703	aaatGGTAATGActtt	4.66	-7.08		497	464	480.5
DMU31961	D	-136074	-136067	202160	202167	cggcTTTAATTAcgtt	4.86	-7.45		464	2	233
DMU31961	R	-136072	-136065	202162	202169	ggaaCGTAATTAaagc	4.33	-6.51		2	289	145.5
DMU31961	R	-135783	-135776	202451	202458	cgctGGCAATGGgtct	4.71	-7.22		289	470	379.5
DMU31961	R	-135313	-135306	202921	202928	gtctTCCAATTAggcc	4.71	-7.18		470	171	320.5
DMU31961	D	-135142	-135135	203092	203099	atgtTTCCATTAatgg	4.37	-6.57		171	215	193
DMU31961	D	-134927	-134920	203307	203314	ggagTTCAATGAcgta	4.68	-7.11		215	405	310
DMU31961	D	-134522	-134515	203712	203719	ctcaTCCAATTGgcca	4.34	-6.53		405	2	203.5
DMU31961	R	-134520	-134513	203714	203721	aatgGCCAATTGgatg	5.05	-7.9		2	630	316
DMU31961	R	-133890	-133883	204344	204351	ttttGCCCATTAagaa	4.5	-6.83		630	492	561
DMU31961	D	-133398	-133391	204836	204843	ctctTGCAATTGtgcg	4.61	-6.96		492	135	313.5
DMU31961	D	-133263	-133256	204971	204978	atgtTTTAATTAaata	4.86	-7.45		135	2	68.5
DMU31961	R	-133261	-133254	204973	204980	gataTTTAATTAaaac	4.86	-7.45		2	311	156.5
DMU31961	D	-132950	-132943	205284	205291	ctctGTCAATTAttgg	6	-10.44		311	34	172.5
DMU31961	D	-132916	-132909	205318	205325	cacaCTTAATTAttaa	4.64	-7		34	295	164.5
DMU31961	D	-132621	-132614	205613	205620	acccCTCAATTAttat	5.07	-7.94		295	321	308
DMU31961	D	-132300	-132293	205934	205941	aatcGGCAATGGcggg	4.71	-7.22		321	775	548
DMU31961	D	-131525	-131518	206709	206716	aataTTTAATTGgctt	4.49	-6.79		775	2	388.5
DMU31961	R	-131523	-131516	206711	206718	aaaaGCCAATTAaata	5.42	-8.94		2	537	269.5
DMU31961	R	-130986	-130979	207248	207255	cgttGGCAATAAtcca	4.42	-6.69		537	126	331.5
DMU31961	D	-130860	-130853	207374	207381	tctcTTCAATTAccaa	5.29	-8.49		126	2	64
DMU31961	R	-130858	-130851	207376	207383	ctttGGTAATTGaaga	4.89	-7.57		2	142	72
DMU31961	R	-130716	-130709	207518	207525	gtaaGGCAATTGattg	5.32	-8.72		142	1077	609.5
DMU31961	R	-129639	-129632	208595	208602	gcagGGCAATAAacac	4.42	-6.69		1077	248	662.5
DMU31961	D	-129391	-129384	208843	208850	gtcaGCTAATTGttaa	4.62	-6.98		248	71	159.5
DMU31961	D	-129320	-129313	208914	208921	gcatTTTAATTAgccg	4.86	-7.45		71	2	36.5
DMU31961	R	-129318	-129311	208916	208923	ggcgGCTAATTAaaat	5	-7.8		2	86	44
DMU31961	D	-129232	-129225	209002	209009	taaaTGTAATTAtttg	4.55	-6.87		86	468	277
DMU31961	D	-128764	-128757	209470	209477	tgttGTCAATGAattt	5.4	-8.8		468	41	254.5
DMU31961	D	-128723	-128716	209511	209518	ccctTTCCATTAaaca	4.37	-6.57		41	31	36
DMU31961	D	-128692	-128685	209542	209549	taaaTTTAATTAcgca	4.86	-7.45		31	2	16.5
DMU31961	R	-128690	-128683	209544	209551	tttgCGTAATTAaatt	4.33	-6.51		2	334	168
DMU31961	R	-128356	-128349	209878	209885	tgttTTCAATGAggaa	4.68	-7.11		334	28	181
DMU31961	D	-128328	-128321	209906	209913	tgctGCTAATGAgcga	4.39	-6.65		28	78	53
DMU31961	R	-128250	-128243	209984	209991	cgtcGGCCATTAaaaa	4.77	-7.37		78	660	369
DMU31961	D	-127590	-127583	210644	210651	cttgGTCCATTAaaaa	5.08	-8.03		660	164	412
DMU31961	D	-127426	-127419	210808	210815	atctTTCAATTAattg	5.29	-8.49		164	6	85
DMU31961	R	-127420	-127413	210814	210821	cgaaTACAATTAattg	4.48	-6.74		6	815	410.5
DMU31961	R	-126605	-126598	211629	211636	ggtgTGTAATTAgttg	4.55	-6.87		815	559	687
DMU31961	D	-126046	-126039	212188	212195	aagaTTCAATGAacag	4.68	-7.11		559	240	399.5
DMU31961	D	-125806	-125799	212428	212435	cttcGGCAATTAaacg	5.69	-9.93		240	2	121
DMU31961	R	-125804	-125797	212430	212437	ggcgTTTAATTGccga	4.49	-6.79		2	365	183.5
DMU31961	D	-125439	-125432	212795	212802	taagGATAATTAtgtc	4.77	-7.31		365	167	266
DMU31961	D	-125272	-125265	212962	212969	gtcgGGCAATAAgctt	4.42	-6.69		167	37	102
DMU31961	D	-125235	-125228	212999	213006	acttGTTAATTAtttt	5.58	-9.1		37	169	103
DMU31961	D	-125066	-125059	213168	213175	tgcgGCTAATTGaagt	4.62	-6.98		169	2	85.5
DMU31961	R	-125064	-125057	213170	213177	tgacTTCAATTAgccg	5.29	-8.49		2	182	92
DMU31961	D	-124882	-124875	213352	213359	cacgGACAATGAaaag	4.59	-6.92		182	16	99
DMU31961	R	-124866	-124859	213368	213375	ttagCTCAATTGttcg	4.7	-7.14		16	7	11.5
DMU31961	D	-124859	-124852	213375	213382	ttgaGCTAATGAcgtg	4.39	-6.65		7	243	125
DMU31961	D	-124616	-124609	213618	213625	accaCTCAATGAaatt	4.46	-6.71		243	340	291.5
DMU31961	R	-124276	-124269	213958	213965	atagGCCCATTAaatt	4.5	-6.83		340	127	233.5
DMU31961	D	-124149	-124142	214085	214092	cttaCTCAATTGtgtt	4.7	-7.14		127	479	303
DMU31961	D	-123670	-123663	214564	214571	ggtgTTCAATTGgatt	4.92	-7.6		479	2	240.5
DMU31961	R	-123668	-123661	214566	214573	ttaaTCCAATTGaaca	4.34	-6.53		2	1891	946.5
DMU31961	R	-121777	-121770	216457	216464	tttcGTCAATTAcgaa	6	-10.44		1891	124	1007.5
DMU31961	D	-121653	-121646	216581	216588	taagTGCAATGAgcag	4.37	-6.59		124	39	81.5
DMU31961	D	-121614	-121607	216620	216627	tgaaTGCAATTAaatc	4.98	-7.73		39	2	20.5
DMU31961	R	-121612	-121605	216622	216629	tggaTTTAATTGcatt	4.49	-6.79		2	260	131
DMU31961	R	-121352	-121345	216882	216889	ttcaTTCAATTAgata	5.29	-8.49		260	22	141
DMU31961	D	-121330	-121323	216904	216911	acttTGCAATTAaatt	4.98	-7.73		22	2	12
DMU31961	R	-121328	-121321	216906	216913	ataaTTTAATTGcaaa	4.49	-6.79		2	11	6.5
DMU31961	R	-121317	-121310	216917	216924	caatTTCCATTAtaat	4.37	-6.57		11	395	203
DMU31961	D	-120922	-120915	217312	217319	aacaGATAATTAagga	4.77	-7.31		395	2	198.5
DMU31961	R	-120920	-120913	217314	217321	tttcCTTAATTAtctg	4.64	-7		2	319	160.5
DMU31961	D	-120601	-120594	217633	217640	gcgaGTCAATTAaatc	6	-10.44		319	2	160.5
DMU31961	R	-120599	-120592	217635	217642	ttgaTTTAATTGactc	4.49	-6.79		2	172	87
DMU31961	D	-120427	-120420	217807	217814	acttTTTAATTAaaat	4.86	-7.45		172	2	87
DMU31961	R	-120425	-120418	217809	217816	gaatTTTAATTAaaaa	4.86	-7.45		2	47	24.5
DMU31961	D	-120378	-120371	217856	217863	ttatTTTAATTAccca	4.86	-7.45		47	2	24.5
DMU31961	R	-120376	-120369	217858	217865	aatgGGTAATTAaaat	5.27	-8.35		2	89	45.5
DMU31961	D	-120287	-120280	217947	217954	ttctGTTCATTAttgt	4.66	-7.05		89	993	541
DMU31961	R	-119294	-119287	218940	218947	tttgGATAATTActtg	4.77	-7.31		993	403	698
DMU31961	R	-118891	-118884	219343	219350	aaacGGCCATTAcgaa	4.77	-7.37		403	64	233.5
DMU31961	D	-118827	-118820	219407	219414	ttgtCTCAATTGtttg	4.7	-7.14		64	86	75
DMU31961	D	-118741	-118734	219493	219500	ttgaTTTAATTGccca	4.49	-6.79		86	2	44
DMU31961	R	-118739	-118732	219495	219502	actgGGCAATTAaatc	5.69	-9.93		2	607	304.5
DMU31961	D	-118132	-118125	220102	220109	aattTTTAATTGaata	4.49	-6.79		607	2	304.5
DMU31961	R	-118130	-118123	220104	220111	attaTTCAATTAaaaa	5.29	-8.49		2	54	28
DMU31961	D	-118076	-118069	220158	220165	cgtcGGTAATTAgcta	5.27	-8.35		54	2	28
DMU31961	R	-118074	-118067	220160	220167	tctaGCTAATTAccga	5	-7.8		2	20	11
DMU31961	D	-118054	-118047	220180	220187	aacaTTTAATTGgcaa	4.49	-6.79		20	2	11
DMU31961	R	-118052	-118045	220182	220189	atttGCCAATTAaatg	5.42	-8.94		2	522	262
DMU31961	D	-117530	-117523	220704	220711	tcgcGGTAATTGgcaa	4.89	-7.57		522	2	262
DMU31961	R	-117528	-117521	220706	220713	gtttGCCAATTAccgc	5.42	-8.94		2	31	16.5
DMU31961	R	-117497	-117490	220737	220744	aaacTGCAATTAagta	4.98	-7.73		31	219	125
DMU31961	R	-117278	-117271	220956	220963	gcgtGGCAATTAcaca	5.69	-9.93		219	181	200
DMU31961	R	-117097	-117090	221137	221144	cagaGTCCATTAaaag	5.08	-8.03		181	750	465.5
DMU31961	D	-116347	-116340	221887	221894	tgtaGTCCATTGgtcc	4.71	-7.17		750	671	710.5
DMU31961	R	-115676	-115669	222558	222565	caaaGGCCATTGaaaa	4.4	-6.68		671	558	614.5
DMU31961	D	-115118	-115111	223116	223123	taatGTCATTTAtcaa	4.53	-6.85		558	118	338
DMU31961	D	-115000	-114993	223234	223241	atgtGTTAATGAgtaa	4.97	-7.67		118	211	164.5
DMU31961	D	-114789	-114782	223445	223452	atagGTTCATTAattt	4.66	-7.05		211	42	126.5
DMU31961	D	-114747	-114740	223487	223494	aattTTCAATTAcaga	5.29	-8.49		42	453	247.5
DMU31961	D	-114294	-114287	223940	223947	gccgGCCAATGAccgg	4.82	-7.4		453	171	312
DMU31961	R	-114123	-114116	224111	224118	tttcGTTAATTAgaaa	5.58	-9.1		171	119	145
DMU31961	D	-114004	-113997	224230	224237	tatcGTCCATTGgtgg	4.71	-7.17		119	42	80.5
DMU31961	R	-113962	-113955	224272	224279	ctcaTTTAATTAgatg	4.86	-7.45		42	241	141.5
DMU31961	D	-113721	-113714	224513	224520	tggcGGCCATTAatca	4.77	-7.37		241	300	270.5
DMU31961	R	-113421	-113414	224813	224820	gctgGTCAATAAaatg	4.73	-7.23		300	363	331.5
DMU31961	R	-113058	-113051	225176	225183	taatTCCAATTGctag	4.34	-6.53		363	69	216
DMU31961	D	-112989	-112982	225245	225252	aaaaGTCAATTAtacg	6	-10.44		69	227	148
DMU31961	D	-112762	-112755	225472	225479	cagaTCCAATTGgagg	4.34	-6.53		227	2	114.5
DMU31961	R	-112760	-112753	225474	225481	gcccTCCAATTGgatc	4.34	-6.53		2	167	84.5
DMU31961	D	-112593	-112586	225641	225648	gtgcTGTAATTAtaga	4.55	-6.87		167	100	133.5
DMU31961	R	-112493	-112486	225741	225748	gtacATCAATTAggtc	4.39	-6.62		100	581	340.5
DMU31961	D	-111912	-111905	226322	226329	gtggTTCAATGAaatg	4.68	-7.11		581	1003	792
DMU31961	R	-110909	-110902	227325	227332	gttgGTCCATTGtgcc	4.71	-7.17		1003	313	658
DMU31961	D	-110596	-110589	227638	227645	tgaaTTCAATTAagtt	5.29	-8.49		313	86	199.5
DMU31961	D	-110510	-110503	227724	227731	atctGCCAATTActgt	5.42	-8.94		86	198	142
DMU31961	R	-110312	-110305	227922	227929	aaatGGTAATTGttaa	4.89	-7.57		198	1331	764.5
DMU31961	D	-108981	-108974	229253	229260	taatGGCAATGGggca	4.71	-7.22		1331	777	1054
DMU31961	D	-108204	-108197	230030	230037	atcaTGCAATTGagca	4.61	-6.96		777	2	389.5
DMU31961	R	-108202	-108195	230032	230039	ggtgCTCAATTGcatg	4.7	-7.14		2	132	67
DMU31961	D	-108070	-108063	230164	230171	ggtcGACAATTGccgt	4.82	-7.41		132	2	67
DMU31961	R	-108068	-108061	230166	230173	agacGGCAATTGtcga	5.32	-8.72		2	1181	591.5
DMU31961	D	-106887	-106880	231347	231354	tgatTTCAATTGtttt	4.92	-7.6		1181	233	707
DMU31961	R	-106654	-106647	231580	231587	ctgaGGCAATGAttaa	5.09	-8.09		233	200	216.5
DMU31961	R	-106454	-106447	231780	231787	ttggTGCAATTAttag	4.98	-7.73		200	1176	688
DMU31961	D	-105278	-105271	232956	232963	ataaCTCAATTGaata	4.7	-7.14		1176	2	589
DMU31961	R	-105276	-105269	232958	232965	aataTTCAATTGagtt	4.92	-7.6		2	1073	537.5
DMU31961	D	-104203	-104196	234031	234038	agcaTTTAATTGccga	4.49	-6.79		1073	2	537.5
DMU31961	R	-104201	-104194	234033	234040	agtcGGCAATTAaatg	5.69	-9.93		2	395	198.5
DMU31961	D	-103806	-103799	234428	234435	tattCTCAATGActca	4.46	-6.71		395	425	410
DMU31961	D	-103381	-103374	234853	234860	tcctGGCAATGAaccc	5.09	-8.09		425	38	231.5
DMU31961	R	-103343	-103336	234891	234898	gtcgGCCAATTGtttg	5.05	-7.9		38	110	74
DMU31961	R	-103233	-103226	235001	235008	agtgCTCAATTAgtcg	5.07	-7.94		110	125	117.5
DMU31961	D	-103108	-103101	235126	235133	gcctCTCAATTAattg	5.07	-7.94		125	6	65.5
DMU31961	R	-103102	-103095	235132	235139	aggaTACAATTAattg	4.48	-6.74		6	480	243
DMU31961	R	-102622	-102615	235612	235619	atggCTTAATTAgaaa	4.64	-7		480	88	284
DMU31961	R	-102534	-102527	235700	235707	gaagTGCAATTGtaat	4.61	-6.96		88	691	389.5
DMU31961	D	-101843	-101836	236391	236398	cattTTTAATTGacgt	4.49	-6.79		691	2	346.5
DMU31961	R	-101841	-101834	236393	236400	gaacGTCAATTAaaaa	6	-10.44		2	40	21
DMU31961	D	-101801	-101794	236433	236440	tcgaTTCAATTAtgcg	5.29	-8.49		40	147	93.5
DMU31961	R	-101654	-101647	236580	236587	aagtGGCAATTGggcc	5.32	-8.72		147	69	108
DMU31961	D	-101585	-101578	236649	236656	gcttCGCAATTGttga	4.39	-6.6		69	334	201.5
DMU31961	D	-101251	-101244	236983	236990	caatGGCAATGGcagc	4.71	-7.22		334	33	183.5
DMU31961	D	-101218	-101211	237016	237023	acgcCTCAATTAccac	5.07	-7.94		33	2	17.5
DMU31961	R	-101216	-101209	237018	237025	cggtGGTAATTGaggc	4.89	-7.57		2	261	131.5
DMU31961	R	-100955	-100948	237279	237286	cgaaGCCAATTAagac	5.42	-8.94		261	58	159.5
DMU31961	R	-100897	-100890	237337	237344	atttTCCAATTAagca	4.71	-7.18		58	167	112.5
DMU31961	R	-100730	-100723	237504	237511	gctaGTCATTTAggca	4.53	-6.85		167	1113	640
DMU31961	D	-99617	-99610	238617	238624	cgtcGTCAATGGaatg	5.02	-7.87		1113	671	892
DMU31961	D	-98946	-98939	239288	239295	agacCCCAATTAaaaa	4.49	-6.82		671	2	336.5
DMU31961	R	-98944	-98937	239290	239297	ttttTTTAATTGgggt	4.49	-6.79		2	219	110.5
DMU31961	D	-98725	-98718	239509	239516	gttgGCCCATTAactt	4.5	-6.83		219	2	110.5
DMU31961	R	-98723	-98716	239511	239518	acaaGTTAATGGgcca	4.6	-6.94		2	195	98.5
DMU31961	D	-98528	-98521	239706	239713	gttaTTCAATTAaaac	5.29	-8.49		195	2	98.5
DMU31961	R	-98526	-98519	239708	239715	ccgtTTTAATTGaata	4.49	-6.79		2	583	292.5
DMU31961	D	-97943	-97936	240291	240298	aggtGGCAATTAaacg	5.69	-9.93		583	2	292.5
DMU31961	R	-97941	-97934	240293	240300	gccgTTTAATTGccac	4.49	-6.79		2	17	9.5
DMU31961	R	-97924	-97917	240310	240317	gcagGGCAATTAgaca	5.69	-9.93		17	115	66
DMU31961	D	-97809	-97802	240425	240432	cgggGCTAATTGgcca	4.62	-6.98		115	2	58.5
DMU31961	R	-97807	-97800	240427	240434	tgtgGCCAATTAgccc	5.42	-8.94		2	1887	944.5
DMU31961	R	-95920	-95913	242314	242321	atatTGTAATTAttaa	4.55	-6.87		1887	96	991.5
DMU31961	R	-95824	-95817	242410	242417	attaTTTAATTGttca	4.49	-6.79		96	8	52
DMU31961	R	-95816	-95809	242418	242425	agctGGTCATTAttta	4.35	-6.54		8	718	363
DMU31961	R	-95098	-95091	243136	243143	ttatTGCAATTAttat	4.98	-7.73		718	93	405.5
DMU31961	D	-95005	-94998	243229	243236	cgaaTTCAATTAacag	5.29	-8.49		93	2	47.5
DMU31961	R	-95003	-94996	243231	243238	tgctGTTAATTGaatt	5.2	-8.23		2	15	8.5
DMU31961	D	-94988	-94981	243246	243253	aaagTGCAATTGgcta	4.61	-6.96		15	2	8.5
DMU31961	R	-94986	-94979	243248	243255	tttaGCCAATTGcact	5.05	-7.9		2	648	325
DMU31961	D	-94338	-94331	243896	243903	gaatGGCAATGGgcag	4.71	-7.22		648	334	491
DMU31961	D	-94004	-93997	244230	244237	caatGCCAATGGcggt	4.44	-6.71		334	243	288.5
DMU31961	D	-93761	-93754	244473	244480	gaatGCCAATTGcacc	5.05	-7.9		243	2	122.5
DMU31961	R	-93759	-93752	244475	244482	atggTGCAATTGgcat	4.61	-6.96		2	276	139
DMU31961	R	-93483	-93476	244751	244758	agacGGCAATTAatca	5.69	-9.93		276	16	146
DMU31961	D	-93467	-93460	244767	244774	ctgcTCCAATTAacag	4.71	-7.18		16	2	9
DMU31961	R	-93465	-93458	244769	244776	gtctGTTAATTGgagc	5.2	-8.23		2	724	363
DMU31961	D	-92741	-92734	245493	245500	cggcGGTAATTGttgc	4.89	-7.57		724	240	482
DMU31961	D	-92501	-92494	245733	245740	attaTGTAATTAcgtt	4.55	-6.87		240	2	121
DMU31961	R	-92499	-92492	245735	245742	tgaaCGTAATTAcata	4.33	-6.51		2	265	133.5
DMU31961	D	-92234	-92227	246000	246007	ttttTTTAATTGttcg	4.49	-6.79		265	141	203
DMU31961	R	-92093	-92086	246141	246148	caacTTTAATTGtttt	4.49	-6.79		141	76	108.5
DMU31961	D	-92017	-92010	246217	246224	tcagGGTAATGAaatt	4.66	-7.08		76	78	77
DMU31961	R	-91939	-91932	246295	246302	tttcGGCAATGGtgtt	4.71	-7.22		78	305	191.5
DMU31961	R	-91634	-91627	246600	246607	aaatGGCAATAAtgcg	4.42	-6.69		305	362	333.5
DMU31961	R	-91272	-91265	246962	246969	tcagGACAATGAttta	4.59	-6.92		362	541	451.5
DMU31961	D	-90731	-90724	247503	247510	gatgGTCAATTGacac	5.63	-9.6		541	2	271.5
DMU31961	R	-90729	-90722	247505	247512	acgtGTCAATTGacca	5.63	-9.6		2	73	37.5
DMU31961	D	-90656	-90649	247578	247585	gtgaCGTAATTAtcag	4.33	-6.51		73	2	37.5
DMU31961	R	-90654	-90647	247580	247587	tcctGATAATTAcgtc	4.77	-7.31		2	49	25.5
DMU31961	D	-90605	-90598	247629	247636	taccTGCAATTGtatg	4.61	-6.96		49	53	51
DMU31961	D	-90552	-90545	247682	247689	caagGTTAATGGgctg	4.6	-6.94		53	2	27.5
DMU31961	R	-90550	-90543	247684	247691	cacaGCCCATTAacct	4.5	-6.83		2	75	38.5
DMU31961	D	-90475	-90468	247759	247766	aacaTGCAATTAattg	4.98	-7.73		75	6	40.5
DMU31961	R	-90469	-90462	247765	247772	ccctGGCAATTAattg	5.69	-9.93		6	729	367.5
DMU31961	D	-89740	-89733	248494	248501	aaaaGTCAATTAgttg	6	-10.44		729	599	664
DMU31961	R	-89141	-89134	249093	249100	aaggGTTAATGGaggg	4.6	-6.94		599	489	544
DMU31961	D	-88652	-88645	249582	249589	gagcTTCAATTAagat	5.29	-8.49		489	53	271
DMU31961	R	-88599	-88592	249635	249642	actgGACAATTGtgaa	4.82	-7.41		53	869	461
DMU31961	D	-87730	-87723	250504	250511	ggtcGGCAATTAagat	5.69	-9.93		869	32	450.5
DMU31961	D	-87698	-87691	250536	250543	gatgGGCAATAAaagg	4.42	-6.69		32	1081	556.5
DMU31961	R	-86617	-86610	251617	251624	cgatTTTAATTAtttg	4.86	-7.45		1081	22	551.5
DMU31961	D	-86595	-86588	251639	251646	taacTTTAATTGaata	4.49	-6.79		22	2	12
DMU31961	R	-86593	-86586	251641	251648	aataTTCAATTAaagt	5.29	-8.49		2	63	32.5
DMU31961	R	-86530	-86523	251704	251711	tggaATCAATTAgagg	4.39	-6.62		63	8	35.5
DMU31961	D	-86522	-86515	251712	251719	tgatTCCAATTAtcag	4.71	-7.18		8	2	5
DMU31961	R	-86520	-86513	251714	251721	aactGATAATTGgaat	4.39	-6.66		2	627	314.5
DMU31961	D	-85893	-85886	252341	252348	cgctGGCAATTAatat	5.69	-9.93		627	24	325.5
DMU31961	D	-85869	-85862	252365	252372	gcaaTTCAATTGgcca	4.92	-7.6		24	2	13
DMU31961	R	-85867	-85860	252367	252374	gttgGCCAATTGaatt	5.05	-7.9		2	203	102.5
DMU31961	D	-85664	-85657	252570	252577	tttcGTTAATTAacag	5.58	-9.1		203	2	102.5
DMU31961	R	-85662	-85655	252572	252579	agctGTTAATTAacga	5.58	-9.1		2	59	30.5
DMU31961	R	-85603	-85596	252631	252638	ctcaGACAATGAataa	4.59	-6.92		59	52	55.5
DMU31961	D	-85551	-85544	252683	252690	ttaaTTTAATTAtaat	4.86	-7.45		52	146	99
DMU31961	R	-85405	-85398	252829	252836	aaaaTTCCATTAtaaa	4.37	-6.57		146	233	189.5
DMU31961	D	-85172	-85165	253062	253069	aaaaTCCAATTAcaca	4.71	-7.18		233	224	228.5
DMU31961	D	-84948	-84941	253286	253293	tataTTCAATTGataa	4.92	-7.6		224	503	363.5
DMU31961	D	-84445	-84438	253789	253796	aagaGATAATTAaata	4.77	-7.31		503	2	252.5
DMU31961	R	-84443	-84436	253791	253798	gctaTTTAATTAtctc	4.86	-7.45		2	70	36
DMU31961	R	-84373	-84366	253861	253868	cgttGGCCATTGcatt	4.4	-6.68		70	89	79.5
DMU31961	D	-84284	-84277	253950	253957	ttttGATAATTGctgg	4.39	-6.66		89	562	325.5
DMU31961	D	-83722	-83715	254512	254519	aattGTTAATTGaata	5.2	-8.23		562	2	282
DMU31961	R	-83720	-83713	254514	254521	aataTTCAATTAacaa	5.29	-8.49		2	152	77
DMU31961	D	-83568	-83561	254666	254673	tcgaTTTAATTGaatt	4.49	-6.79		152	2	77
DMU31961	R	-83566	-83559	254668	254675	taaaTTCAATTAaatc	5.29	-8.49		2	1023	512.5
DMU31961	D	-82543	-82536	255691	255698	aagaGCCAATGGacat	4.44	-6.71		1023	2	512.5
DMU31961	R	-82541	-82534	255693	255700	agatGTCCATTGgctc	4.71	-7.17		2	46	24
DMU31961	D	-82495	-82488	255739	255746	aggtTTCAATTAatga	5.29	-8.49		46	28	37
DMU31961	R	-82467	-82460	255767	255774	ttacGGCAATGAggcc	5.09	-8.09		28	9	18.5
DMU31961	R	-82458	-82451	255776	255783	aagtGTTCATTAcggc	4.66	-7.05		9	44	26.5
DMU31961	D	-82414	-82407	255820	255827	atgtGCTAATTAttgg	5	-7.8		44	147	95.5
DMU31961	D	-82267	-82260	255967	255974	ttgaGTCAATAAgcac	4.73	-7.23		147	189	168
DMU31961	R	-82078	-82071	256156	256163	aaccGTTCATTAagtg	4.66	-7.05		189	170	179.5
DMU31961	R	-81908	-81901	256326	256333	gaatGGCAATAAaagt	4.42	-6.69		170	32	101
DMU31961	D	-81876	-81869	256358	256365	ggtaTGCAATTAgtca	4.98	-7.73		32	8	20
DMU31961	D	-81868	-81861	256366	256373	attaGTCAATTAattt	6	-10.44		8	437	222.5
DMU31961	R	-81431	-81424	256803	256810	aaaaGTCATTTAtttc	4.53	-6.85		437	651	544
DMU31961	D	-80780	-80773	257454	257461	agctGTCAATGGgagt	5.02	-7.87		651	565	608
DMU31961	D	-80215	-80208	258019	258026	caacGACAATTGagcc	4.82	-7.41		565	2	283.5
DMU31961	R	-80213	-80206	258021	258028	ctggCTCAATTGtcgt	4.7	-7.14		2	94	48
DMU31961	R	-80119	-80112	258115	258122	aactGACAATGAcata	4.59	-6.92		94	537	315.5
DMU31961	D	-79582	-79575	258652	258659	ttttGGCAATGGaaat	4.71	-7.22		537	159	348
DMU31961	D	-79423	-79416	258811	258818	ttcaGCTAATTAcaaa	5	-7.8		159	2	80.5
DMU31961	R	-79421	-79414	258813	258820	cattTGTAATTAgctg	4.55	-6.87		2	278	140
DMU31961	D	-79143	-79136	259091	259098	accaTTTAATTAtaaa	4.86	-7.45		278	474	376
DMU31961	D	-78669	-78662	259565	259572	atggGTTAATGAgttg	4.97	-7.67		474	310	392
DMU31961	R	-78359	-78352	259875	259882	tccaCCCAATTAtgaa	4.49	-6.82		310	161	235.5
DMU31961	R	-78198	-78191	260036	260043	tattCCCAATTAtgtg	4.49	-6.82		161	311	236
DMU31961	R	-77887	-77880	260347	260354	cctcTGCAATTGtagt	4.61	-6.96		311	141	226
DMU31961	R	-77746	-77739	260488	260495	tggcTGCAATTGttgc	4.61	-6.96		141	489	315
DMU31961	D	-77257	-77250	260977	260984	cggtTTCCATTAacat	4.37	-6.57		489	2	245.5
DMU31961	R	-77255	-77248	260979	260986	taatGTTAATGGaaac	4.6	-6.94		2	173	87.5
DMU31961	R	-77082	-77075	261152	261159	aattTGCAATTGttgc	4.61	-6.96		173	186	179.5
DMU31961	R	-76896	-76889	261338	261345	ggacTGCAATTGtttt	4.61	-6.96		186	289	237.5
DMU31961	D	-76607	-76600	261627	261634	gggcGGCCATTGcagc	4.4	-6.68		289	384	336.5
DMU31961	R	-76223	-76216	262011	262018	tttcGCCAATGGgtta	4.44	-6.71		384	26	205
DMU31961	D	-76197	-76190	262037	262044	gtctGTTAATTGatca	5.2	-8.23		26	2	14
DMU31961	R	-76195	-76188	262039	262046	attgATCAATTAacag	4.39	-6.62		2	87	44.5
DMU31961	D	-76108	-76101	262126	262133	aaaaTTTAATTAgatt	4.86	-7.45		87	67	77
DMU31961	R	-76041	-76034	262193	262200	tccaTGCAATTGtatg	4.61	-6.96		67	74	70.5
DMU31961	R	-75967	-75960	262267	262274	atttTGCAATTGtatt	4.61	-6.96		74	894	484
DMU31961	D	-75073	-75066	263161	263168	ttgcGTCCATTActta	5.08	-8.03		894	256	575
DMU31961	R	-74817	-74810	263417	263424	ccggGGCAATAAaatg	4.42	-6.69		256	594	425
DMU31961	D	-74223	-74216	264011	264018	cgctGGCCATTGctgc	4.4	-6.68		594	615	604.5
DMU31961	D	-73608	-73601	264626	264633	cattGTTAATGGccga	4.6	-6.94		615	2	308.5
DMU31961	R	-73606	-73599	264628	264635	attcGGCCATTAacaa	4.77	-7.37		2	49	25.5
DMU31961	D	-73557	-73550	264677	264684	aaccGTCAATGGagca	5.02	-7.87		49	71	60
DMU31961	D	-73486	-73479	264748	264755	actcGGCCATTAatta	4.77	-7.37		71	6	38.5
DMU31961	R	-73480	-73473	264754	264761	taagTTTAATTAatgg	4.86	-7.45		6	646	326
DMU31961	R	-72834	-72827	265400	265407	tgggTGCAATGAaacc	4.37	-6.59		646	2043	1344.5
DMU31961	R	-70791	-70784	267443	267450	aattGGCAATTAtttt	5.69	-9.93		2043	5	1024
DMU31961	D	-70786	-70779	267448	267455	aattGCCAATTAttca	5.42	-8.94		5	124	64.5
DMU31961	D	-70662	-70655	267572	267579	ggtgTGCAATTAaagc	4.98	-7.73		124	2	63
DMU31961	R	-70660	-70653	267574	267581	tggcTTTAATTGcaca	4.49	-6.79		2	237	119.5
DMU31961	D	-70423	-70416	267811	267818	cacaGCCAATTAaaca	5.42	-8.94		237	2	119.5
DMU31961	R	-70421	-70414	267813	267820	tgtgTTTAATTGgctg	4.49	-6.79		2	873	437.5
DMU31961	R	-69548	-69541	268686	268693	aatcTTTAATTAttat	4.86	-7.45		873	58	465.5
DMU31961	D	-69490	-69483	268744	268751	tataATCAATTAcaat	4.39	-6.62		58	42	50
DMU31961	D	-69448	-69441	268786	268793	gatcCTCAATTGctct	4.7	-7.14		42	37	39.5
DMU31961	D	-69411	-69404	268823	268830	tcccATCAATTAgatc	4.39	-6.62		37	9	23
DMU31961	D	-69402	-69395	268832	268839	ttagATCAATTAtatt	4.39	-6.62		9	389	199
DMU31961	R	-69013	-69006	269221	269228	atttTCCAATTGcttc	4.34	-6.53		389	178	283.5
DMU31961	D	-68835	-68828	269399	269406	ccatTGCAATTAtcag	4.98	-7.73		178	2	90
DMU31961	R	-68833	-68826	269401	269408	aactGATAATTGcaat	4.39	-6.66		2	189	95.5
DMU31961	R	-68644	-68637	269590	269597	gaggGGCAATTAagag	5.69	-9.93		189	33	111
DMU31961	D	-68611	-68604	269623	269630	attaGTTAATTGgcgg	5.2	-8.23		33	2	17.5
DMU31961	R	-68609	-68602	269625	269632	ggccGCCAATTAacta	5.42	-8.94		2	831	416.5
DMU31961	D	-67778	-67771	270456	270463	tgttTGCAATTAacaa	4.98	-7.73		831	2	416.5
DMU31961	R	-67776	-67769	270458	270465	cgttGTTAATTGcaaa	5.2	-8.23		2	54	28
DMU31961	D	-67722	-67715	270512	270519	cgcgCGCAATTAaaac	4.76	-7.28		54	2	28
DMU31961	R	-67720	-67713	270514	270521	gtgtTTTAATTGcgcg	4.49	-6.79		2	73	37.5
DMU31961	D	-67647	-67640	270587	270594	tggtGGCCATTAgctt	4.77	-7.37		73	174	123.5
DMU31961	D	-67473	-67466	270761	270768	ttatGGCCATTGaccc	4.4	-6.68		174	2	88
DMU31961	R	-67471	-67464	270763	270770	cgggGTCAATGGccat	5.02	-7.87		2	1373	687.5
DMU31961	R	-66098	-66091	272136	272143	taatGGCAATTAtgat	5.69	-9.93		1373	77	725
DMU31961	D	-66021	-66014	272213	272220	tgcgGCCAATGAttat	4.82	-7.4		77	252	164.5
DMU31961	R	-65769	-65762	272465	272472	tgctGACAATTAataa	5.19	-8.14		252	355	303.5
DMU31961	D	-65414	-65407	272820	272827	gtttTTTAATTGcaaa	4.49	-6.79		355	2	178.5
DMU31961	R	-65412	-65405	272822	272829	ggttTGCAATTAaaaa	4.98	-7.73		2	367	184.5
DMU31961	D	-65045	-65038	273189	273196	gaatTTCAATTGccga	4.92	-7.6		367	2	184.5
DMU31961	R	-65043	-65036	273191	273198	aatcGGCAATTGaaat	5.32	-8.72		2	15	8.5
DMU31961	R	-65028	-65021	273206	273213	ataaGTCAATTAtata	6	-10.44		15	385	200
DMU31961	R	-64643	-64636	273591	273598	ttatGGTCATTAaatt	4.35	-6.54		385	774	579.5
DMU31961	R	-63869	-63862	274365	274372	gagcGGCCATTAaaat	4.77	-7.37		774	431	602.5
DMU31961	D	-63438	-63431	274796	274803	atgtGGTAATTAagcc	5.27	-8.35		431	2	216.5
DMU31961	R	-63436	-63429	274798	274805	tcggCTTAATTAccac	4.64	-7		2	46	24
DMU31961	D	-63390	-63383	274844	274851	aggcGATAATTAtaaa	4.77	-7.31		46	428	237
DMU31961	D	-62962	-62955	275272	275279	aagtGATAATTGgtcc	4.39	-6.66		428	120	274
DMU31961	D	-62842	-62835	275392	275399	aagcTTTAATTAgaac	4.86	-7.45		120	640	380
DMU31961	R	-62202	-62195	276032	276039	aaaaGTTAATGAtcac	4.97	-7.67		640	613	626.5
DMU31961	R	-61589	-61582	276645	276652	gtgaGTTCATTAggtc	4.66	-7.05		613	1705	1159
DMU31961	R	-59884	-59877	278350	278357	aaatTTTAATTAtgcg	4.86	-7.45		1705	38	871.5
DMU31961	D	-59846	-59839	278388	278395	atcgGGCAATTGagtt	5.32	-8.72		38	2	20
DMU31961	R	-59844	-59837	278390	278397	acaaCTCAATTGcccg	4.7	-7.14		2	96	49
DMU31961	D	-59748	-59741	278486	278493	acaaTGTAATTAaatt	4.55	-6.87		96	2	49
DMU31961	R	-59746	-59739	278488	278495	acaaTTTAATTAcatt	4.86	-7.45		2	26	14
DMU31961	D	-59720	-59713	278514	278521	gtatTTCAATTAaatt	5.29	-8.49		26	2	14
DMU31961	R	-59718	-59711	278516	278523	ttaaTTTAATTGaaat	4.49	-6.79		2	417	209.5
DMU31961	D	-59301	-59294	278933	278940	caatGGCAATTAaaag	5.69	-9.93		417	2	209.5
DMU31961	R	-59299	-59292	278935	278942	tgctTTTAATTGccat	4.49	-6.79		2	10	6
DMU31961	R	-59289	-59282	278945	278952	cctgGGTAATTGcttt	4.89	-7.57		10	10	10
DMU31961	D	-59279	-59272	278955	278962	cccaGGCCATTAacgc	4.77	-7.37		10	2	6
DMU31961	R	-59277	-59270	278957	278964	ctgcGTTAATGGcctg	4.6	-6.94		2	142	72
DMU31961	D	-59135	-59128	279099	279106	ggctGGCAATAAgtca	4.42	-6.69		142	165	153.5
DMU31961	D	-58970	-58963	279264	279271	tttcTTTAATTGcaca	4.49	-6.79		165	2	83.5
DMU31961	R	-58968	-58961	279266	279273	aatgTGCAATTAaaga	4.98	-7.73		2	29	15.5
DMU31961	D	-58939	-58932	279295	279302	cgacGTCAATAGcagc	4.35	-6.55		29	805	417
DMU31961	D	-58134	-58127	280100	280107	gaaaCTCAATGAaaac	4.46	-6.71		805	401	603
DMU31961	R	-57733	-57726	280501	280508	gaatTTTAATTAgttt	4.86	-7.45		401	1032	716.5
DMU31961	R	-56701	-56694	281533	281540	gaacTTCAATTGttca	4.92	-7.6		1032	510	771
DMU31961	D	-56191	-56184	282043	282050	ataaTTTAATTAtaat	4.86	-7.45		510	62	286
DMU31961	D	-56129	-56122	282105	282112	tgttGACAATGAaaaa	4.59	-6.92		62	200	131
DMU31961	D	-55929	-55922	282305	282312	ccccGCCAATGGtgac	4.44	-6.71		200	44	122
DMU31961	R	-55885	-55878	282349	282356	ttttGGCCATTAcgga	4.77	-7.37		44	82	63
DMU31961	R	-55803	-55796	282431	282438	actcGATAATTAtgtc	4.77	-7.31		82	445	263.5
DMU31961	R	-55358	-55351	282876	282883	cgacGTCAATAAccac	4.73	-7.23		445	123	284
DMU31961	D	-55235	-55228	282999	283006	agagGGCAATAAaatg	4.42	-6.69		123	331	227
DMU31961	D	-54904	-54897	283330	283337	gcttTGCAATTGtttg	4.61	-6.96		331	245	288
DMU31961	D	-54659	-54652	283575	283582	ccacCTTAATTAgcca	4.64	-7		245	2	123.5
DMU31961	R	-54657	-54650	283577	283584	tttgGCTAATTAaggt	5	-7.8		2	71	36.5
DMU31961	D	-54586	-54579	283648	283655	aataGTCAATTAatgg	6	-10.44		71	247	159
DMU31961	D	-54339	-54332	283895	283902	gcatTTTAATTGaagt	4.49	-6.79		247	2	124.5
DMU31961	R	-54337	-54330	283897	283904	gcacTTCAATTAaaat	5.29	-8.49		2	212	107
DMU31961	D	-54125	-54118	284109	284116	aattGGCAATAAgcat	4.42	-6.69		212	98	155
DMU31961	R	-54027	-54020	284207	284214	cactGTTAATTAatct	5.58	-9.1		98	97	97.5
DMU31961	D	-53930	-53923	284304	284311	aggcGCTAATTGtcct	4.62	-6.98		97	2	49.5
DMU31961	R	-53928	-53921	284306	284313	gcagGACAATTAgcgc	5.19	-8.14		2	930	466
DMU31961	R	-52998	-52991	285236	285243	tataTGTAATTAggca	4.55	-6.87		930	70	500
DMU31961	D	-52928	-52921	285306	285313	ctatTTTAATTGaaca	4.49	-6.79		70	2	36
DMU31961	R	-52926	-52919	285308	285315	aatgTTCAATTAaaat	5.29	-8.49		2	200	101
DMU31961	D	-52726	-52719	285508	285515	tggaGATAATTGtcag	4.39	-6.66		200	2	101
DMU31961	R	-52724	-52717	285510	285517	gcctGACAATTAtctc	5.19	-8.14		2	30	16
DMU31961	D	-52694	-52687	285540	285547	gaacTCCAATTAcaat	4.71	-7.18		30	576	303
DMU31961	D	-52118	-52111	286116	286123	atgtGCTAATTGcctt	4.62	-6.98		576	2	289
DMU31961	R	-52116	-52109	286118	286125	ttaaGGCAATTAgcac	5.69	-9.93		2	287	144.5
DMU31961	D	-51829	-51822	286405	286412	ttcgATCAATTAccat	4.39	-6.62		287	2	144.5
DMU31961	R	-51827	-51820	286407	286414	acatGGTAATTGatcg	4.89	-7.57		2	748	375
DMU31961	D	-51079	-51072	287155	287162	catcTTCAATTGgttc	4.92	-7.6		748	1488	1118
DMU31961	D	-49591	-49584	288643	288650	taaaGGCAATGAacag	5.09	-8.09		1488	363	925.5
DMU31961	R	-49228	-49221	289006	289013	acgtGGCAATAAattt	4.42	-6.69		363	25	194
DMU31961	D	-49203	-49196	289031	289038	ctccTTCAATTAtatt	5.29	-8.49		25	1211	618
DMU31961	R	-47992	-47985	290242	290249	agcaGACAATGAtctc	4.59	-6.92		1211	792	1001.5
DMU31961	R	-47200	-47193	291034	291041	caacGGCAATGGcaat	4.71	-7.22		792	59	425.5
DMU31961	R	-47141	-47134	291093	291100	cattTGCAATGAgttg	4.37	-6.59		59	693	376
DMU31961	D	-46448	-46441	291786	291793	taaaTGCAATTGcaat	4.61	-6.96		693	2	347.5
DMU31961	R	-46446	-46439	291788	291795	aaatTGCAATTGcatt	4.61	-6.96		2	123	62.5
DMU31961	R	-46323	-46316	291911	291918	atgcGTCAATAGaatt	4.35	-6.55		123	449	286
DMU31961	D	-45874	-45867	292360	292367	aaaaTTCAATTAtcac	5.29	-8.49		449	2	225.5
DMU31961	R	-45872	-45865	292362	292369	aagtGATAATTGaatt	4.39	-6.66		2	75	38.5
DMU31961	R	-45797	-45790	292437	292444	cggcGGCAATAAcaat	4.42	-6.69		75	121	98
DMU31961	D	-45676	-45669	292558	292565	tcatTTTAATTAtttc	4.86	-7.45		121	18	69.5
DMU31961	D	-45658	-45651	292576	292583	tttgTGCAATTAcaca	4.98	-7.73		18	80	49
DMU31961	R	-45578	-45571	292656	292663	ccgtTTCAATTAgttg	5.29	-8.49		80	720	400
DMU31961	R	-44858	-44851	293376	293383	ttatCTCAATGAtatg	4.46	-6.71		720	595	657.5
DMU31961	D	-44263	-44256	293971	293978	atatTCCAATTActca	4.71	-7.18		595	9	302
DMU31961	R	-44254	-44247	293980	293987	ttcgGCCAATGAgtaa	4.82	-7.4		9	127	68
DMU31961	D	-44127	-44120	294107	294114	aattTTCAATTAaccg	5.29	-8.49		127	2	64.5
DMU31961	R	-44125	-44118	294109	294116	aacgGTTAATTGaaaa	5.2	-8.23		2	97	49.5
DMU31961	D	-44028	-44021	294206	294213	tcgcGGCCATTGcaaa	4.4	-6.68		97	261	179
DMU31961	R	-43767	-43760	294467	294474	cgcaGACAATTAagtg	5.19	-8.14		261	124	192.5
DMU31961	R	-43643	-43636	294591	294598	gagaGTTAATGGcacc	4.6	-6.94		124	59	91.5
DMU31961	D	-43584	-43577	294650	294657	agttTTTAATTGaatt	4.49	-6.79		59	2	30.5
DMU31961	R	-43582	-43575	294652	294659	aaaaTTCAATTAaaaa	5.29	-8.49		2	168	85
DMU31961	D	-43414	-43407	294820	294827	ctagTTTAATTAgttt	4.86	-7.45		168	389	278.5
DMU31961	R	-43025	-43018	295209	295216	ggctGCCAATTAaggc	5.42	-8.94		389	428	408.5
DMU31961	D	-42597	-42590	295637	295644	attgCTTAATTAgtta	4.64	-7		428	162	295
DMU31961	R	-42435	-42428	295799	295806	ttaaGGCCATTAgtgc	4.77	-7.37		162	139	150.5
DMU31961	R	-42296	-42289	295938	295945	ccggGGTCATTAgggg	4.35	-6.54		139	1079	609
DMU31961	D	-41217	-41210	297017	297024	gaccCTTAATTAgtgt	4.64	-7		1079	82	580.5
DMU31961	R	-41135	-41128	297099	297106	aaacGACAATTAagca	5.19	-8.14		82	156	119
DMU31961	D	-40979	-40972	297255	297262	cgagTGTAATTAtcct	4.55	-6.87		156	2	79
DMU31961	R	-40977	-40970	297257	297264	tcagGATAATTAcact	4.77	-7.31		2	217	109.5
DMU31961	D	-40760	-40753	297474	297481	aaatGGCAATAAaatc	4.42	-6.69		217	394	305.5
DMU31961	D	-40366	-40359	297868	297875	agagTTTAATTGgatc	4.49	-6.79		394	2	198
DMU31961	R	-40364	-40357	297870	297877	cggaTCCAATTAaact	4.71	-7.18		2	251	126.5
DMU31961	D	-40113	-40106	298121	298128	aaggGGTAATTAatgt	5.27	-8.35		251	1322	786.5
DMU31961	D	-38791	-38784	299443	299450	ttagTTTAATTGcact	4.49	-6.79		1322	2	662
DMU31961	R	-38789	-38782	299445	299452	acagTGCAATTAaact	4.98	-7.73		2	78	40
DMU31961	D	-38711	-38704	299523	299530	gcgcGTCCATTGcgat	4.71	-7.17		78	713	395.5
DMU31961	R	-37998	-37991	300236	300243	ttgcGGCCATTGttct	4.4	-6.68		713	424	568.5
DMU31961	R	-37574	-37567	300660	300667	gaatGCCAATTGtttt	5.05	-7.9		424	193	308.5
DMU31961	D	-37381	-37374	300853	300860	ccacGTCCATTGccat	4.71	-7.17		193	2	97.5
DMU31961	R	-37379	-37372	300855	300862	ccatGGCAATGGacgt	4.71	-7.22		2	406	204
DMU31961	D	-36973	-36966	301261	301268	gtttTGTAATTAaatg	4.55	-6.87		406	2	204
DMU31961	R	-36971	-36964	301263	301270	agcaTTTAATTAcaaa	4.86	-7.45		2	44	23
DMU31961	D	-36927	-36920	301307	301314	aaaaTTCCATTAagta	4.37	-6.57		44	72	58
DMU31961	R	-36855	-36848	301379	301386	atccTTCAATGAaagg	4.68	-7.11		72	244	158
DMU31961	R	-36611	-36604	301623	301630	tagtTTTAATTAgttg	4.86	-7.45		244	591	417.5
DMU31961	D	-36020	-36013	302214	302221	ttttTGCAATTAataa	4.98	-7.73		591	1060	825.5
DMU31961	D	-34960	-34953	303274	303281	tataGTTAATTAtttg	5.58	-9.1		1060	114	587
DMU31961	R	-34846	-34839	303388	303395	cagcCGCAATTGttgg	4.39	-6.6		114	465	289.5
DMU31961	D	-34381	-34374	303853	303860	ggctGGCAATGAgccg	5.09	-8.09		465	612	538.5
DMU31961	D	-33769	-33762	304465	304472	tgatTTTAATTAacta	4.86	-7.45		612	2	307
DMU31961	R	-33767	-33760	304467	304474	ggtaGTTAATTAaaat	5.58	-9.1		2	197	99.5
DMU31961	R	-33570	-33563	304664	304671	attgGGCAATAAatca	4.42	-6.69		197	958	577.5
DMU31961	D	-32612	-32605	305622	305629	acaaGTTAATTAcact	5.58	-9.1		958	2	480
DMU31961	R	-32610	-32603	305624	305631	cgagTGTAATTAactt	4.55	-6.87		2	253	127.5
DMU31961	D	-32357	-32350	305877	305884	ccaaTTCAATTGgcgt	4.92	-7.6		253	2	127.5
DMU31961	R	-32355	-32348	305879	305886	tgacGCCAATTGaatt	5.05	-7.9		2	25	13.5
DMU31961	D	-32330	-32323	305904	305911	ccatTTTAATTGccca	4.49	-6.79		25	2	13.5
DMU31961	R	-32328	-32321	305906	305913	gttgGGCAATTAaaat	5.69	-9.93		2	503	252.5
DMU31961	D	-31825	-31818	306409	306416	ccccCCCAATTAtaaa	4.49	-6.82		503	214	358.5
DMU31961	R	-31611	-31604	306623	306630	ggagGGCAATGAaaac	5.09	-8.09		214	234	224
DMU31961	D	-31377	-31370	306857	306864	agttCGCAATTGgcgg	4.39	-6.6		234	2	118
DMU31961	R	-31375	-31368	306859	306866	acccGCCAATTGcgaa	5.05	-7.9		2	186	94
DMU31961	R	-31189	-31182	307045	307052	gcgtTTCAATTGttgt	4.92	-7.6		186	655	420.5
DMU31961	D	-30534	-30527	307700	307707	tgccTTTAATTGgctg	4.49	-6.79		655	2	328.5
DMU31961	R	-30532	-30525	307702	307709	agcaGCCAATTAaagg	5.42	-8.94		2	291	146.5
DMU31961	R	-30241	-30234	307993	308000	tcgtTTTAATTActgc	4.86	-7.45		291	50	170.5
DMU31961	D	-30191	-30184	308043	308050	cgatGGCAATTAaaaa	5.69	-9.93		50	2	26
DMU31961	R	-30189	-30182	308045	308052	cgttTTTAATTGccat	4.49	-6.79		2	247	124.5
DMU31961	D	-29942	-29935	308292	308299	cgggGGCCATTGggcg	4.4	-6.68		247	1252	749.5
DMU31961	R	-28690	-28683	309544	309551	tcagGGCCATTAaaag	4.77	-7.37		1252	200	726
DMU31961	D	-28490	-28483	309744	309751	gaaaCCCAATTAgaac	4.49	-6.82		200	382	291
DMU31961	D	-28108	-28101	310126	310133	agcgTGTAATTAcaag	4.55	-6.87		382	2	192
DMU31961	R	-28106	-28099	310128	310135	cgctTGTAATTAcacg	4.55	-6.87		2	193	97.5
DMU31961	D	-27913	-27906	310321	310328	acaaGTTCATTAtaaa	4.66	-7.05		193	633	413
DMU31961	R	-27280	-27273	310954	310961	ccgcGTCCATTGcgag	4.71	-7.17		633	437	535
DMU31961	D	-26843	-26836	311391	311398	aagtGCCAATTAtgtg	5.42	-8.94		437	198	317.5
DMU31961	D	-26645	-26638	311589	311596	ctgcGATAATTAatta	4.77	-7.31		198	67	132.5
DMU31961	R	-26578	-26571	311656	311663	gtgtGTTCATTAagga	4.66	-7.05		67	195	131
DMU31961	D	-26383	-26376	311851	311858	aaaaTGCAATTAaaaa	4.98	-7.73		195	2	98.5
DMU31961	R	-26381	-26374	311853	311860	cgttTTTAATTGcatt	4.49	-6.79		2	113	57.5
DMU31961	D	-26268	-26261	311966	311973	ctcgCGCAATTAaaag	4.76	-7.28		113	2	57.5
DMU31961	R	-26266	-26259	311968	311975	atctTTTAATTGcgcg	4.49	-6.79		2	270	136
DMU31961	D	-25996	-25989	312238	312245	catcGATAATTAtcgg	4.77	-7.31		270	2	136
DMU31961	R	-25994	-25987	312240	312247	ccccGATAATTAtcga	4.77	-7.31		2	736	369
DMU31961	R	-25258	-25251	312976	312983	atagCTCAATTAatga	5.07	-7.94		736	130	433
DMU31961	D	-25128	-25121	313106	313113	gtgtGCCAATGAtgat	4.82	-7.4		130	87	108.5
DMU31961	D	-25041	-25034	313193	313200	ggctTTTAATTGgcat	4.49	-6.79		87	2	44.5
DMU31961	R	-25039	-25032	313195	313202	tcatGCCAATTAaaag	5.42	-8.94		2	388	195
DMU31961	D	-24651	-24644	313583	313590	aactTGCAATGAatta	4.37	-6.59		388	140	264
DMU31961	D	-24511	-24504	313723	313730	aggcGGCCATTGagag	4.4	-6.68		140	179	159.5
DMU31961	D	-24332	-24325	313902	313909	cggcCGCAATTAcgcc	4.76	-7.28		179	121	150
DMU31961	D	-24211	-24204	314023	314030	aaatCTCAATTAccag	5.07	-7.94		121	2	61.5
DMU31961	R	-24209	-24202	314025	314032	tgctGGTAATTGagat	4.89	-7.57		2	72	37
DMU31961	R	-24137	-24130	314097	314104	agttTTTAATTGcttt	4.49	-6.79		72	231	151.5
DMU31961	D	-23906	-23899	314328	314335	tgctGGCAATTGcaac	5.32	-8.72		231	2	116.5
DMU31961	R	-23904	-23897	314330	314337	gagtTGCAATTGccag	4.61	-6.96		2	9	5.5
DMU31961	D	-23895	-23888	314339	314346	gcaaCTCAATTGcgca	4.7	-7.14		9	2	5.5
DMU31961	R	-23893	-23886	314341	314348	aatgCGCAATTGagtt	4.39	-6.6		2	152	77
DMU31961	D	-23741	-23734	314493	314500	ccaaTTTAATTGacag	4.49	-6.79		152	2	77
DMU31961	R	-23739	-23732	314495	314502	atctGTCAATTAaatt	6	-10.44		2	87	44.5
DMU31961	D	-23652	-23645	314582	314589	cgcaTTTAATTGtttt	4.49	-6.79		87	193	140
DMU31961	D	-23459	-23452	314775	314782	tagaTTTAATTAaatt	4.86	-7.45		193	2	97.5
DMU31961	R	-23457	-23450	314777	314784	gcaaTTTAATTAaatc	4.86	-7.45		2	78	40
DMU31961	D	-23379	-23372	314855	314862	gccaTCCAATTAatcg	4.71	-7.18		78	110	94
DMU31961	D	-23269	-23262	314965	314972	tagaGGCAATTAattt	5.69	-9.93		110	1518	814
DMU31961	D	-21751	-21744	316483	316490	tttgTTTAATTGaaat	4.49	-6.79		1518	2	760
DMU31961	R	-21749	-21742	316485	316492	gaatTTCAATTAaaca	5.29	-8.49		2	357	179.5
DMU31961	R	-21392	-21385	316842	316849	cgatTGCAATTGtgtg	4.61	-6.96		357	524	440.5
DMU31961	D	-20868	-20861	317366	317373	ggttGCCAATTAaacg	5.42	-8.94		524	2	263
DMU31961	R	-20866	-20859	317368	317375	cccgTTTAATTGgcaa	4.49	-6.79		2	174	88
DMU31961	D	-20692	-20685	317542	317549	tggaTGCAATGAcagc	4.37	-6.59		174	190	182
DMU31961	D	-20502	-20495	317732	317739	tgcaGGCAATTGcggc	5.32	-8.72		190	2	96
DMU31961	R	-20500	-20493	317734	317741	aggcCGCAATTGcctg	4.39	-6.6		2	239	120.5
DMU31961	R	-20261	-20254	317973	317980	gtgaTTTAATTGgtta	4.49	-6.79		239	727	483
DMU31961	R	-19534	-19527	318700	318707	ataaTTCCATTAggtt	4.37	-6.57		727	65	396
DMU31961	R	-19469	-19462	318765	318772	cctaGTTAATTAgttt	5.58	-9.1		65	828	446.5
DMU31961	D	-18641	-18634	319593	319600	ccagTGTAATTAgagc	4.55	-6.87		828	84	456
DMU31961	D	-18557	-18550	319677	319684	agccGTTAATTGatcg	5.2	-8.23		84	2	43
DMU31961	R	-18555	-18548	319679	319686	cacgATCAATTAacgg	4.39	-6.62		2	149	75.5
DMU31961	D	-18406	-18399	319828	319835	tcccGATAATTGatcc	4.39	-6.66		149	2	75.5
DMU31961	R	-18404	-18397	319830	319837	aaggATCAATTAtcgg	4.39	-6.62		2	1340	671
DMU31961	R	-17064	-17057	321170	321177	tttaTTCAATTAataa	5.29	-8.49		1340	94	717
DMU31961	D	-16970	-16963	321264	321271	atttTTCAATTAattt	5.29	-8.49		94	1472	783
DMU31961	D	-15498	-15491	322736	322743	tggaGTCAATGAgtgc	5.4	-8.8		1472	87	779.5
DMU31961	D	-15411	-15404	322823	322830	tcaaGGCAATTGcaag	5.32	-8.72		87	2	44.5
DMU31961	R	-15409	-15402	322825	322832	cactTGCAATTGcctt	4.61	-6.96		2	263	132.5
DMU31961	R	-15146	-15139	323088	323095	gcatGACAATGAcccc	4.59	-6.92		263	432	347.5
DMU31961	R	-14714	-14707	323520	323527	tgctGTCCATTGtggg	4.71	-7.17		432	455	443.5
DMU31961	D	-14259	-14252	323975	323982	ctatCGCAATTAcgga	4.76	-7.28		455	733	594
DMU31961	D	-13526	-13519	324708	324715	aaagGGCAATTGtgta	5.32	-8.72		733	43	388
DMU31961	D	-13483	-13476	324751	324758	aaagGACAATTGccaa	4.82	-7.41		43	2	22.5
DMU31961	R	-13481	-13474	324753	324760	aattGGCAATTGtcct	5.32	-8.72		2	5	3.5
DMU31961	D	-13476	-13469	324758	324765	aattGCCAATTGccac	5.05	-7.9		5	2	3.5
DMU31961	R	-13474	-13467	324760	324767	gtgtGGCAATTGgcaa	5.32	-8.72		2	257	129.5
DMU31961	D	-13217	-13210	325017	325024	gttgGCCAATTGaatg	5.05	-7.9		257	2	129.5
DMU31961	R	-13215	-13208	325019	325026	atcaTTCAATTGgcca	4.92	-7.6		2	297	149.5
DMU31961	D	-12918	-12911	325316	325323	catcTTCAATGAggat	4.68	-7.11		297	309	303
DMU31961	D	-12609	-12602	325625	325632	tgaaGTCAATAGtagt	4.35	-6.55		309	404	356.5
DMU31961	R	-12205	-12198	326029	326036	gtaaGGTCATTAaaaa	4.35	-6.54		404	48	226
DMU31961	D	-12157	-12150	326077	326084	ggtaTTCAATTAtttt	5.29	-8.49		48	655	351.5
DMU31961	R	-11502	-11495	326732	326739	gtgcGACAATTGctca	4.82	-7.41		655	424	539.5
DMU31961	D	-11078	-11071	327156	327163	tcacTTCAATTGgctt	4.92	-7.6		424	2	213
DMU31961	R	-11076	-11069	327158	327165	ctaaGCCAATTGaagt	5.05	-7.9		2	182	92
DMU31961	D	-10894	-10887	327340	327347	tactGTTAATGAgagc	4.97	-7.67		182	989	585.5
DMU31961	D	-9905	-9898	328329	328336	tcacGGCAATGAtgtc	5.09	-8.09		989	420	704.5
DMU31961	D	-9485	-9478	328749	328756	acttGCCAATGAactt	4.82	-7.4		420	574	497
DMU31961	D	-8911	-8904	329323	329330	cgatTGCAATTGggct	4.61	-6.96		574	106	340
DMU31961	R	-8805	-8798	329429	329436	cgagTTCAATTGtttt	4.92	-7.6		106	495	300.5
DMU31961	R	-8310	-8303	329924	329931	acatTTTAATTAtgat	4.86	-7.45		495	1245	870
DMU31961	R	-7065	-7058	331169	331176	ttttGACAATTActcg	5.19	-8.14		1245	13	629
DMU31961	D	-7052	-7045	331182	331189	aaatGGCAATTGgagg	5.32	-8.72		13	2	7.5
DMU31961	R	-7050	-7043	331184	331191	ccccTCCAATTGccat	4.34	-6.53		2	968	485
DMU31961	D	-6082	-6075	332152	332159	tataGTTCATTAgacg	4.66	-7.05		968	53	510.5
DMU31961	D	-6029	-6022	332205	332212	aaatTTCAATTAactc	5.29	-8.49		53	2	27.5
DMU31961	R	-6027	-6020	332207	332214	gtgaGTTAATTGaaat	5.2	-8.23		2	476	239
DMU31961	D	-5551	-5544	332683	332690	gattGTTAATGAtggc	4.97	-7.67		476	395	435.5
DMU31961	D	-5156	-5149	333078	333085	aaatGCTAATGAcacc	4.39	-6.65		395	876	635.5
DMU31961	R	-4280	-4273	333954	333961	ttgaGTTCATTAtcta	4.66	-7.05		876	261	568.5
DMU31961	D	-4019	-4012	334215	334222	cacgGGTAATTGaact	4.89	-7.57		261	2	131.5
DMU31961	R	-4017	-4010	334217	334224	tcagTTCAATTAcccg	5.29	-8.49		2	208	105
DMU31961	R	-3809	-3802	334425	334432	atccGGCAATAAgttg	4.42	-6.69		208	473	340.5
DMU31961	D	-3336	-3329	334898	334905	tttgGTTAATTAtata	5.58	-9.1		473	668	570.5
DMU31961	D	-2668	-2661	335566	335573	atcgTGCAATTGcttc	4.61	-6.96		668	126	397
DMU31961	R	-2542	-2535	335692	335699	caacGACAATGAcggc	4.59	-6.92		126	560	343
DMU31961	D	-1982	-1975	336252	336259	gttgGGCAATGAaaaa	5.09	-8.09		560	664	612
DMU31961	D	-1318	-1311	336916	336923	ttgtGGCAATGGcgaa	4.71	-7.22		664	991	827.5
DMU31961	D	-327	-320	337907	337914	ttctGACAATTAaata	5.19	-8.14		991	2	496.5
DMU31961	R	-325	-318	337909	337916	tataTTTAATTGtcag	4.49	-6.79		2		2
													Ratio
											Average	258.134
											Enhancers	261.065	0.988771
											BX-C	257.686	1.00174
											IAB8	253	1.02029
											IAB7b	261	0.989018
											IAB7a	755.833	0.341522
											IAB6	169.312	1.5246
											IAB5	89.5	2.88418
											IAB2	426.6	0.605096
